# Supplementary material for: Mechanisms of Intron Loss and Gain in the Fission Yeast Schizosaccharomyces
Source: PLoS One. 2013 Apr 17;8(4):e61683. doi: 10.1371/journal.pone.0061683 (PMC3629103; doi:10.1371/journal.pone.0061683)
Supplement: Table S1 — Conserved introns across the four fission yeast species. (XLS) [file pone.0061683.s001.xls]

## Sheet: 工作表1
Table S1 Conserve introns across the four fission yeast species.
For each intron, intron rank in CDS is marked after gene ID. For example, SPOG_04578_I1 means the first CDS intron in the gene SPOG_04578.
Intron position in protein sequence is showed next to gene ID. For example, 31-1 means an intron in the 31th amino acid, phase 1.
S. cryophilus		S. octosporus		S. pombe		S. japonicus
SPOG_04578_I1	31-1	SOCG_01498_I1	27-1	SPAC1002.07c_I1	26-1	SJAG_03288_I1	29-1
SPOG_04578_I3	81-2	SOCG_01498_I3	78-2	SPAC1002.07c_I3	77-2	SJAG_03288_I3	80-2
SPOG_04578_I4	91-0	SOCG_01498_I4	88-0	SPAC1002.07c_I4	87-0	SJAG_03288_I4	90-0
SPOG_02710_I8	1006-2	SOCG_03106_I6	1006-2	SPAC1071.02_I4	1003-2	SJAG_02866_I5	1001-2
SPOG_01150_I3	216-1	SOCG_00878_I3	216-1	SPAC1093.03_I3	216-1	SJAG_02289_I3	214-1
SPOG_01150_I4	388-2	SOCG_00878_I4	388-2	SPAC1093.03_I4	388-2	SJAG_02289_I4	386-2
SPOG_00604_I1	422-1	SOCG_02221_I1	422-1	SPAC10F6.03c_I1	422-1	SJAG_05024_I2	367-1
SPOG_00602_I1	9-0	SOCG_02223_I1	9-0	SPAC10F6.05c_I1	24-0	SJAG_05022_I1	9-0
SPOG_00602_I2	56-1	SOCG_02223_I2	56-1	SPAC10F6.05c_I2	71-1	SJAG_05022_I2	56-1
SPOG_00600_I1	16-1	SOCG_02225_I1	14-1	SPAC10F6.08c_I1	15-1	SJAG_05020_I1	15-1
SPOG_00599_I1	5-0	SOCG_02226_I1	5-0	SPAC10F6.09c_I1	5-0	SJAG_05019_I1	5-0
SPOG_00592_I2	41-0	SOCG_02233_I2	41-0	SPAC10F6.16_I2	56-0	SJAG_03309_I2	41-0
SPOG_02131_I1	16-0	SOCG_00374_I1	16-0	SPAC110.03_I1	16-0	SJAG_04509_I1	16-0
SPOG_02131_I2	39-0	SOCG_00374_I2	39-0	SPAC110.03_I2	39-0	SJAG_04509_I2	39-0
SPOG_02111_I2	247-1	SOCG_00392_I2	245-1	SPAC1142.02c_I2	242-1	SJAG_01496_I2	241-1
SPOG_04708_I1	60-1	SOCG_03182_I1	60-1	SPAC1142.07c_I1	59-1	SJAG_01242_I1	60-1
SPOG_00935_I3	195-1	SOCG_01083_I2	181-1	SPAC11E3.03_I3	203-1	SJAG_00207_I3	210-1
SPOG_00934_I1	9-0	SOCG_01084_I1	9-0	SPAC11E3.04c_I1	9-0	SJAG_00208_I1	52-0
SPOG_00934_I2	63-0	SOCG_01084_I2	63-0	SPAC11E3.04c_I2	63-0	SJAG_00208_I2	106-0
SPOG_00934_I3	92-1	SOCG_01084_I3	92-1	SPAC11E3.04c_I3	92-1	SJAG_00208_I3	135-1
SPOG_00932_I1	46-0	SOCG_01086_I1	46-0	SPAC11E3.06_I1	48-0	SJAG_00210_I1	52-0
SPOG_00929_I1	91-0	SOCG_01089_I1	91-0	SPAC11E3.09_I1	96-0	SJAG_00214_I1	92-0
SPOG_00928_I1	21-2	SOCG_01090_I1	21-2	SPAC11E3.10_I1	21-2	SJAG_00215_I1	19-2
SPOG_00928_I3	91-0	SOCG_01090_I3	91-0	SPAC11E3.10_I3	91-0	SJAG_00215_I2	81-0
SPOG_01858_I1	2-0	SOCG_00645_I1	2-0	SPAC11E3.15_I1	2-0	SJAG_00220_I1	2-0
SPOG_01858_I2	86-0	SOCG_00645_I2	86-0	SPAC11E3.15_I2	86-0	SJAG_00220_I2	86-0
SPOG_02662_I1	6-2	SOCG_03058_I1	6-2	SPAC11G7.02_I1	6-2	SJAG_03970_I1	6-2
SPOG_02662_I2	14-1	SOCG_03058_I2	14-1	SPAC11G7.02_I2	14-1	SJAG_03970_I2	14-1
SPOG_02662_I3	62-2	SOCG_03058_I3	62-2	SPAC11G7.02_I3	62-2	SJAG_03970_I3	62-2
SPOG_01006_I2	83-0	SOCG_01019_I2	83-0	SPAC1250.03_I2	83-0	SJAG_05340_I2	84-0
SPOG_03993_I2	70-1	SOCG_02018_I2	70-1	SPAC1296.01c_I2	72-1	SJAG_00978_I2	71-1
SPOG_03993_I5	517-2	SOCG_02018_I5	517-2	SPAC1296.01c_I5	519-2	SJAG_00978_I4	518-2
SPOG_03996_I1	19-2	SOCG_02015_I1	19-2	SPAC1296.04_I1	19-2	SJAG_00974_I1	19-2
SPOG_03996_I2	65-0	SOCG_02015_I2	65-0	SPAC1296.04_I2	65-0	SJAG_00974_I2	65-0
SPOG_03997_I1	44-2	SOCG_02014_I1	44-2	SPAC1296.05c_I1	44-2	SJAG_00973_I1	44-2
SPOG_01182_I1	330-0	SOCG_00847_I1	331-0	SPAC12B10.04_I1	320-0	SJAG_01897_I1	311-0
SPOG_01182_I2	358-0	SOCG_00847_I2	359-0	SPAC12B10.04_I2	348-0	SJAG_01897_I2	339-0
SPOG_01181_I1	53-1	SOCG_00848_I1	53-1	SPAC12B10.05_I1	58-1	SJAG_01896_I1	52-1
SPOG_01181_I3	94-2	SOCG_00848_I3	94-2	SPAC12B10.05_I3	99-2	SJAG_01896_I3	93-2
SPOG_01181_I4	103-2	SOCG_00848_I4	103-2	SPAC12B10.05_I4	108-2	SJAG_01896_I4	102-2
SPOG_01181_I5	108-1	SOCG_00848_I5	108-1	SPAC12B10.05_I5	113-1	SJAG_01896_I5	107-1
SPOG_01181_I8	290-0	SOCG_00848_I8	290-0	SPAC12B10.05_I8	294-0	SJAG_01896_I8	292-0
SPOG_01181_I10	390-0	SOCG_00848_I10	390-0	SPAC12B10.05_I10	394-0	SJAG_01896_I9	392-0
SPOG_01181_I11	426-0	SOCG_00848_I11	426-0	SPAC12B10.05_I11	430-0	SJAG_01896_I10	428-0
SPOG_01178_I1	8-0	SOCG_00851_I1	8-0	SPAC12B10.09_I1	87-0	SJAG_01890_I1	8-0
SPOG_01178_I2	61-1	SOCG_00851_I2	61-1	SPAC12B10.09_I2	140-1	SJAG_01890_I2	61-1
SPOG_01174_I2	101-0	SOCG_00855_I2	101-0	SPAC12B10.13_I2	99-0	SJAG_01886_I1	64-0
SPOG_01815_I1	41-0	SOCG_00683_I1	41-0	SPAC12G12.07c_I1	41-0	SJAG_01477_I1	32-0
SPOG_01966_I1	19-2	SOCG_00539_I1	23-2	SPAC12G12.12_I1	19-2	SJAG_01177_I1	23-2
SPOG_00678_I2	54-0	SOCG_02148_I2	54-0	SPAC139.06_I2	54-0	SJAG_00676_I2	54-0
SPOG_00678_I4	166-2	SOCG_02148_I4	166-2	SPAC139.06_I4	166-2	SJAG_00676_I4	170-2
SPOG_04057_I1	22-0	SOCG_01955_I1	22-0	SPAC13A11.03_I1	22-0	SJAG_03751_I1	22-0
SPOG_01560_I1	14-1	SOCG_02441_I1	14-1	SPAC13C5.02_I1	14-1	SJAG_00809_I1	14-1
SPOG_01560_I2	87-2	SOCG_02441_I2	87-2	SPAC13C5.02_I2	86-2	SJAG_00809_I2	75-2
SPOG_01559_I1	150-1	SOCG_02442_I1	150-1	SPAC13C5.03_I1	121-1	SJAG_00810_I1	146-1
SPOG_00221_I1	73-2	SOCG_04319_I1	73-2	SPAC13D6.04c_I1	70-2	SJAG_02041_I1	57-2
SPOG_00188_I1	112-1	SOCG_04351_I1	113-1	SPAC13F5.02c_I1	110-1	SJAG_01808_I1	112-1
SPOG_00190_I1	37-1	SOCG_04349_I1	37-1	SPAC13F5.04c_I1	35-1	SJAG_04045_I1	34-1
SPOG_00192_I3	726-2	SOCG_04347_I3	725-2	SPAC13F5.06c_I3	726-2	SJAG_06310_I3	723-2
SPOG_00193_I1	27-2	SOCG_04346_I1	27-2	SPAC13F5.07c_I1	27-2	SJAG_04043_I2	27-2
SPOG_02016_I2	104-0	SOCG_00488_I2	104-0	SPAC13G6.05c_I2	104-0	SJAG_02525_I2	114-0
SPOG_02010_I1	25-0	SOCG_00495_I1	25-0	SPAC13G6.11c_I1	25-0	SJAG_04865_I1	22-0
SPOG_02009_I1	840-2	SOCG_00496_I1	839-2	SPAC13G6.12c_I1	832-2	SJAG_04868_I2	830-2
SPOG_00243_I2	89-1	SOCG_04297_I2	89-1	SPAC13G7.03_I2	88-1	SJAG_04056_I2	89-1
SPOG_00248_I1	66-0	SOCG_04292_I1	66-0	SPAC13G7.08c_I1	66-0	SJAG_06315_I1	67-0
SPOG_00584_I1	36-1	SOCG_02241_I1	36-1	SPAC1420.01c_I1	36-1	SJAG_03319_I1	36-1
SPOG_01163_I1	80-0	SOCG_00866_I1	80-0	SPAC144.01_I1	80-0	SJAG_00047_I1	80-0
SPOG_01073_I1	44-0	SOCG_00953_I1	42-0	SPAC144.09c_I1	50-0	SJAG_00067_I1	60-0
SPOG_03925_I1	38-0	SOCG_01608_I1	38-0	SPAC1486.01_I1	36-0	SJAG_03303_I1	36-0
SPOG_00959_I2	73-0	SOCG_01062_I2	73-0	SPAC14C4.02c_I2	73-0	SJAG_03436_I2	76-0
SPOG_00957_I2	231-2	SOCG_01064_I2	231-2	SPAC14C4.03_I2	231-2	SJAG_03438_I2	232-2
SPOG_00950_I1	140-1	SOCG_01071_I1	140-1	SPAC14C4.10c_I1	140-1	SJAG_03443_I1	143-1
SPOG_00946_I2	41-0	SOCG_01075_I2	41-0	SPAC14C4.14_I2	41-0	SJAG_02564_I2	42-0
SPOG_00363_I2	112-2	SOCG_04179_I2	112-2	SPAC1527.02_I2	113-2	SJAG_01027_I2	114-2
SPOG_02738_I1	151-2	SOCG_03133_I1	152-2	SPAC1556.03_I1	146-2	SJAG_01672_I3	151-2
SPOG_02734_I1	29-0	SOCG_03129_I1	29-0	SPAC1556.07_I1	29-0	SJAG_02783_I1	30-0
SPOG_02733_I1	12-0	SOCG_03128_I1	12-0	SPAC1556.08c_I1	12-0	SJAG_02785_I1	12-0
SPOG_02733_I2	54-1	SOCG_03128_I2	54-1	SPAC1556.08c_I2	54-1	SJAG_02785_I2	54-1
SPOG_02733_I3	173-0	SOCG_03128_I3	173-0	SPAC1556.08c_I3	173-0	SJAG_02785_I3	173-0
SPOG_02733_I4	226-1	SOCG_03128_I4	226-1	SPAC1556.08c_I4	226-1	SJAG_02785_I4	226-1
SPOG_04730_I2	32-2	SOCG_03160_I2	32-2	SPAC15A10.05c_I2	28-2	SJAG_02462_I2	29-2
SPOG_04734_I1	17-2	SOCG_03157_I1	17-2	SPAC15A10.08_I1	17-2	SJAG_04621_I1	17-2
SPOG_04739_I2	89-0	SOCG_03152_I2	89-0	SPAC15A10.13_I2	89-0	SJAG_04622_I2	89-0
SPOG_04739_I10	455-0	SOCG_03152_I10	455-0	SPAC15A10.13_I5	453-0	SJAG_04622_I9	450-0
SPOG_04740_I2	26-2	SOCG_03151_I2	26-2	SPAC15A10.15_I2	26-2	SJAG_04623_I2	24-2
SPOG_04743_I1	100-0	SOCG_03148_I1	100-0	SPAC15E1.03_I1	100-0	SJAG_04626_I1	100-0
SPOG_04745_I1	22-1	SOCG_03146_I1	19-1	SPAC15E1.05c_I1	23-1	SJAG_04628_I1	16-1
SPOG_04746_I1	21-0	SOCG_03145_I1	21-0	SPAC15E1.06_I1	21-0	SJAG_04629_I1	21-0
SPOG_04748_I1	31-1	SOCG_03143_I1	31-1	SPAC15E1.08_I1	31-1	SJAG_04631_I1	31-1
SPOG_04748_I2	96-1	SOCG_03143_I2	96-1	SPAC15E1.08_I2	96-1	SJAG_04631_I2	96-1
SPOG_04748_I3	130-2	SOCG_03143_I3	130-2	SPAC15E1.08_I3	130-2	SJAG_04631_I3	130-2
SPOG_00286_I1	23-1	SOCG_04253_I1	23-1	SPAC15F9.02_I1	23-1	SJAG_02424_I1	24-1
SPOG_00287_I1	3-1	SOCG_04252_I1	3-1	SPAC15F9.03c_I1	3-1	SJAG_02425_I1	3-1
SPOG_00287_I2	30-0	SOCG_04252_I2	30-0	SPAC15F9.03c_I2	30-0	SJAG_02425_I2	30-0
SPOG_00287_I3	54-0	SOCG_04252_I3	54-0	SPAC15F9.03c_I3	54-0	SJAG_02425_I3	54-0
SPOG_00287_I4	88-0	SOCG_04252_I4	88-0	SPAC15F9.03c_I4	88-0	SJAG_02425_I4	88-0
SPOG_00348_I1	9-2	SOCG_04194_I1	9-2	SPAC16.01_I1	9-2	SJAG_00424_I1	9-2
SPOG_00348_I3	48-0	SOCG_04194_I4	50-0	SPAC16.01_I4	50-0	SJAG_00424_I4	50-0
SPOG_00348_I4	62-2	SOCG_04194_I5	64-2	SPAC16.01_I5	64-2	SJAG_00424_I5	64-2
SPOG_00348_I5	68-0	SOCG_04194_I6	70-0	SPAC16.01_I6	70-0	SJAG_00424_I6	70-0
SPOG_00348_I6	99-0	SOCG_04194_I7	101-0	SPAC16.01_I7	101-0	SJAG_00424_I7	101-0
SPOG_00347_I1	15-1	SOCG_04195_I1	15-1	SPAC16.02c_I1	15-1	SJAG_00425_I1	15-1
SPOG_00347_I2	89-2	SOCG_04195_I2	89-2	SPAC16.02c_I6	89-2	SJAG_00425_I6	88-2
SPOG_00347_I3	112-0	SOCG_04195_I3	112-0	SPAC16.02c_I7	112-0	SJAG_00425_I7	111-0
SPOG_00347_I4	137-2	SOCG_04195_I4	137-2	SPAC16.02c_I8	137-2	SJAG_00425_I8	136-2
SPOG_00347_I5	170-0	SOCG_04195_I5	170-0	SPAC16.02c_I9	170-0	SJAG_00425_I9	169-0
SPOG_04569_I1	41-1	SOCG_01506_I1	41-1	SPAC1610.03c_I1	41-1	SJAG_03283_I1	42-1
SPOG_04569_I2	100-2	SOCG_01506_I2	100-2	SPAC1610.03c_I2	100-2	SJAG_03283_I2	101-2
SPOG_04569_I3	265-0	SOCG_01506_I3	265-0	SPAC1610.03c_I3	258-0	SJAG_03283_I3	262-0
SPOG_01990_I1	31-1	SOCG_00515_I1	31-1	SPAC1639.02c_I1	36-1	SJAG_02883_I1	33-1
SPOG_01990_I7	846-0	SOCG_00515_I6	843-0	SPAC1639.02c_I8	790-0	SJAG_02883_I19	621-0
SPOG_01990_I8	869-1	SOCG_00515_I7	866-1	SPAC1639.02c_I9	813-1	SJAG_02883_I20	644-1
SPOG_01990_I9	892-0	SOCG_00515_I8	889-0	SPAC1639.02c_I10	836-0	SJAG_02883_I21	667-0
SPOG_01990_I10	899-1	SOCG_00515_I9	896-1	SPAC1639.02c_I11	843-1	SJAG_02883_I22	674-1
SPOG_01990_I11	907-0	SOCG_00515_I10	904-0	SPAC1639.02c_I12	851-0	SJAG_02883_I23	682-0
SPOG_04905_I1	996-0	SOCG_02371_I3	999-0	SPAC167.01_I1	1015-0	SJAG_04435_I1	937-0
SPOG_00730_I1	24-0	SOCG_02093_I1	24-0	SPAC1687.01_I1	24-0	SJAG_00731_I1	24-0
SPOG_00730_I2	57-2	SOCG_02093_I2	57-2	SPAC1687.01_I2	57-2	SJAG_00731_I2	57-2
SPOG_00730_I3	83-1	SOCG_02093_I3	83-1	SPAC1687.01_I3	83-1	SJAG_00731_I3	83-1
SPOG_00728_I1	22-2	SOCG_02095_I1	22-2	SPAC1687.03c_I1	23-2	SJAG_00729_I1	25-2
SPOG_00728_I2	59-0	SOCG_02095_I2	59-0	SPAC1687.03c_I2	60-0	SJAG_00729_I2	62-0
SPOG_00720_I2	163-2	SOCG_02103_I3	177-2	SPAC1687.12c_I3	177-2	SJAG_00721_I2	158-2
SPOG_00717_I2	70-0	SOCG_02107_I2	70-0	SPAC1687.15_I2	70-0	SJAG_00718_I2	69-0
SPOG_00715_I3	51-0	SOCG_02109_I3	51-0	SPAC1687.17c_I3	51-0	SJAG_00681_I2	48-0
SPOG_00714_I1	59-0	SOCG_02110_I1	59-0	SPAC1687.18c_I1	60-0	SJAG_00682_I1	60-0
SPOG_00714_I2	103-0	SOCG_02110_I2	103-0	SPAC1687.18c_I2	104-0	SJAG_00682_I2	104-0
SPOG_00713_I1	44-1	SOCG_02111_I1	44-1	SPAC1687.19c_I1	44-1	SJAG_00683_I1	45-1
SPOG_00713_I2	235-2	SOCG_02111_I2	235-2	SPAC1687.19c_I2	235-2	SJAG_00683_I2	236-2
SPOG_00711_I1	19-0	SOCG_02113_I1	19-0	SPAC1687.21_I1	19-0	SJAG_00685_I1	19-0
SPOG_00711_I2	60-0	SOCG_02113_I2	60-0	SPAC1687.21_I2	60-0	SJAG_00685_I2	60-0
SPOG_00711_I3	82-0	SOCG_02113_I3	82-0	SPAC1687.21_I3	82-0	SJAG_00685_I3	82-0
SPOG_03875_I2	22-1	SOCG_01656_I2	22-1	SPAC16A10.04_I2	26-1	SJAG_01774_I2	25-1
SPOG_03875_I3	37-0	SOCG_01656_I3	37-0	SPAC16A10.04_I3	41-0	SJAG_01774_I3	40-0
SPOG_03875_I4	105-0	SOCG_01656_I4	105-0	SPAC16A10.04_I4	109-0	SJAG_01774_I4	108-0
SPOG_03875_I5	150-0	SOCG_01656_I5	150-0	SPAC16A10.04_I5	154-0	SJAG_01774_I5	153-0
SPOG_03964_I2	40-1	SOCG_02048_I2	40-1	SPAC16C9.01c_I2	40-1	SJAG_03879_I2	42-1
SPOG_03963_I1	30-0	SOCG_02049_I1	30-0	SPAC16C9.02c_I1	34-0	SJAG_03880_I1	31-0
SPOG_03963_I2	217-0	SOCG_02049_I2	217-0	SPAC16C9.02c_I2	221-0	SJAG_03880_I2	218-0
SPOG_03961_I1	18-2	SOCG_02051_I1	18-2	SPAC16C9.04c_I1	18-2	SJAG_03883_I1	18-2
SPOG_03961_I2	78-2	SOCG_02051_I2	78-2	SPAC16C9.04c_I2	78-2	SJAG_03883_I2	78-2
SPOG_02062_I1	78-0	SOCG_00441_I1	78-0	SPAC16E8.01_I1	78-0	SJAG_00521_I1	78-0
SPOG_02064_I1	231-0	SOCG_00439_I1	231-0	SPAC16E8.04c_I1	231-0	SJAG_00518_I1	236-0
SPOG_02065_I1	62-1	SOCG_00438_I1	62-1	SPAC16E8.05c_I1	62-1	SJAG_00517_I1	65-1
SPOG_02067_I2	40-0	SOCG_00436_I2	70-0	SPAC16E8.07c_I2	40-0	SJAG_00516_I2	40-0
SPOG_02070_I1	177-0	SOCG_00433_I1	176-0	SPAC16E8.10c_I1	178-0	SJAG_00513_I1	175-0
SPOG_02071_I1	16-1	SOCG_00432_I1	16-1	SPAC16E8.11c_I1	16-1	SJAG_00512_I1	16-1
SPOG_02071_I2	45-1	SOCG_00432_I2	45-1	SPAC16E8.11c_I2	45-1	SJAG_00512_I2	45-1
SPOG_02074_I1	12-2	SOCG_00429_I1	12-2	SPAC16E8.14c_I1	12-2	SJAG_00508_I1	12-2
SPOG_02074_I2	32-0	SOCG_00429_I2	32-0	SPAC16E8.14c_I2	32-0	SJAG_00508_I2	32-0
SPOG_02074_I3	122-1	SOCG_00429_I3	122-1	SPAC16E8.14c_I3	122-1	SJAG_00508_I3	122-1
SPOG_02074_I4	158-0	SOCG_00429_I4	158-0	SPAC16E8.14c_I4	158-0	SJAG_00508_I4	158-0
SPOG_02075_I1	75-2	SOCG_00428_I1	75-2	SPAC16E8.15_I1	76-2	SJAG_00507_I1	73-2
SPOG_04519_I1	15-1	SOCG_01556_I1	15-1	SPAC1751.02c_I1	15-1	SJAG_04918_I1	15-1
SPOG_04519_I2	50-2	SOCG_01556_I2	50-2	SPAC1751.02c_I2	50-2	SJAG_04918_I2	50-2
SPOG_04520_I1	17-0	SOCG_01555_I1	17-0	SPAC1751.03_I1	17-0	SJAG_04891_I1	49-0
SPOG_04520_I2	70-1	SOCG_01555_I2	70-1	SPAC1751.03_I2	70-1	SJAG_04891_I2	102-1
SPOG_04518_I2	49-0	SOCG_01557_I2	50-0	SPAC1751.04_I2	47-0	SJAG_04919_I2	60-0
SPOG_04518_I3	74-0	SOCG_01557_I3	75-0	SPAC1751.04_I3	72-0	SJAG_04919_I3	85-0
SPOG_01108_I1	11-2	SOCG_00918_I1	11-2	SPAC1782.07_I1	11-2	SJAG_00080_I1	11-2
SPOG_01108_I2	17-2	SOCG_00918_I2	17-2	SPAC1782.07_I2	17-2	SJAG_00080_I2	17-2
SPOG_01106_I1	17-1	SOCG_00920_I1	17-1	SPAC1782.09c_I1	17-1	SJAG_00082_I1	17-1
SPOG_01103_I1	11-1	SOCG_00923_I1	11-1	SPAC1782.12c_I1	11-1	SJAG_00085_I1	12-1
SPOG_00195_I1	9-1	SOCG_04344_I1	9-1	SPAC1783.02c_I1	9-1	SJAG_04039_I1	9-1
SPOG_00197_I1	65-1	SOCG_04342_I1	68-1	SPAC1783.04c_I1	65-1	SJAG_16221_I1	73-1
SPOG_00199_I2	91-0	SOCG_04340_I2	92-0	SPAC1783.06c_I2	92-0	SJAG_04036_I2	94-0
SPOG_02085_I1	7-2	SOCG_00418_I1	7-2	SPAC17A2.03c_I1	7-2	SJAG_01913_I1	7-2
SPOG_04561_I1	100-2	SOCG_01514_I1	100-2	SPAC17A5.11_I1	94-2	SJAG_05295_I1	100-2
SPOG_04564_I1	5-0	SOCG_01511_I1	5-0	SPAC17A5.14_I1	5-0	SJAG_03276_I1	5-0
SPOG_04564_I2	28-2	SOCG_01511_I2	28-2	SPAC17A5.14_I2	28-2	SJAG_03276_I2	28-2
SPOG_04566_I1	7-2	SOCG_01509_I1	7-2	SPAC17A5.16_I1	7-2	SJAG_03278_I1	7-2
SPOG_04566_I2	21-0	SOCG_01509_I2	21-0	SPAC17A5.16_I2	21-0	SJAG_03278_I2	21-0
SPOG_04566_I3	32-0	SOCG_01509_I3	32-0	SPAC17A5.16_I3	32-0	SJAG_03278_I3	32-0
SPOG_04566_I6	424-0	SOCG_01509_I6	423-0	SPAC17A5.16_I6	443-0	SJAG_03278_I6	411-0
SPOG_02104_I1	23-2	SOCG_00399_I1	23-2	SPAC17G6.12_I1	23-2	SJAG_02591_I1	21-2
SPOG_02104_I2	52-2	SOCG_00399_I2	52-2	SPAC17G6.12_I2	52-2	SJAG_02591_I2	50-2
SPOG_02104_I3	74-1	SOCG_00399_I3	74-1	SPAC17G6.12_I3	74-1	SJAG_02591_I3	72-1
SPOG_02107_I1	21-0	SOCG_00396_I1	21-0	SPAC17G6.15c_I1	21-0	SJAG_04588_I1	21-0
SPOG_02107_I2	30-2	SOCG_00396_I2	30-2	SPAC17G6.15c_I2	30-2	SJAG_04588_I2	30-2
SPOG_02107_I3	66-1	SOCG_00396_I3	66-1	SPAC17G6.15c_I3	67-1	SJAG_04588_I3	67-1
SPOG_02107_I4	90-0	SOCG_00396_I4	90-0	SPAC17G6.15c_I4	91-0	SJAG_04588_I4	91-0
SPOG_02107_I5	202-0	SOCG_00396_I5	202-0	SPAC17G6.15c_I5	203-0	SJAG_04588_I5	203-0
SPOG_02108_I1	16-0	SOCG_00395_I1	16-0	SPAC17G6.16c_I1	16-0	SJAG_04587_I1	16-0
SPOG_02108_I2	45-0	SOCG_00395_I2	45-0	SPAC17G6.16c_I2	45-0	SJAG_04587_I2	45-0
SPOG_02108_I3	78-2	SOCG_00395_I3	78-2	SPAC17G6.16c_I3	78-2	SJAG_04587_I3	78-2
SPOG_02108_I6	421-0	SOCG_00395_I6	421-0	SPAC17G6.16c_I5	421-0	SJAG_04587_I5	421-0
SPOG_00264_I1	49-2	SOCG_04275_I1	49-2	SPAC17G8.04c_I1	49-2	SJAG_04098_I1	49-2
SPOG_00264_I2	73-0	SOCG_04275_I2	73-0	SPAC17G8.04c_I2	73-0	SJAG_04098_I2	73-0
SPOG_00264_I3	132-0	SOCG_04275_I3	132-0	SPAC17G8.04c_I3	132-0	SJAG_04098_I3	132-0
SPOG_00265_I2	35-1	SOCG_04274_I2	35-1	SPAC17G8.05_I2	35-1	SJAG_16213_I1	35-1
SPOG_05751_I1	27-0	SOCG_04276_I1	27-0	SPAC17G8.15_I1	27-0	SJAG_04099_I1	29-0
SPOG_00124_I1	19-1	SOCG_04665_I1	19-1	SPAC17H9.13c_I1	19-1	SJAG_03457_I1	20-1
SPOG_00124_I2	118-0	SOCG_04665_I2	118-0	SPAC17H9.13c_I2	118-0	SJAG_03457_I2	119-0
SPOG_00126_I1	131-0	SOCG_04663_I1	131-0	SPAC17H9.16_I1	131-0	SJAG_03415_I1	126-0
SPOG_00127_I1	33-1	SOCG_04662_I1	33-1	SPAC17H9.17c_I1	33-1	SJAG_03416_I1	33-1
SPOG_00129_I3	157-0	SOCG_04660_I3	157-0	SPAC17H9.20_I3	158-0	SJAG_03418_I1	138-0
SPOG_00129_I4	294-2	SOCG_04660_I4	295-2	SPAC17H9.20_I4	295-2	SJAG_03418_I2	278-2
SPOG_03751_I1	111-2	SOCG_04505_I1	111-2	SPAC1805.03c_I1	109-2	SJAG_01375_I1	105-2
SPOG_03751_I2	123-0	SOCG_04505_I2	123-0	SPAC1805.03c_I2	121-0	SJAG_01375_I2	117-0
SPOG_03753_I1	45-0	SOCG_04503_I1	45-0	SPAC1805.05_I1	45-0	SJAG_01373_I1	45-0
SPOG_03753_I2	69-1	SOCG_04503_I2	69-1	SPAC1805.05_I2	69-1	SJAG_01373_I2	69-1
SPOG_03755_I1	46-1	SOCG_04501_I1	46-1	SPAC1805.07c_I1	46-1	SJAG_01371_I1	49-1
SPOG_03756_I1	3-0	SOCG_04500_I1	3-0	SPAC1805.08_I1	3-0	SJAG_01370_I1	3-0
SPOG_03760_I1	42-1	SOCG_04496_I1	42-1	SPAC1805.11c_I1	42-1	SJAG_01366_I1	42-1
SPOG_03762_I1	36-0	SOCG_04494_I1	36-0	SPAC1805.13_I1	36-0	SJAG_01364_I1	36-0
SPOG_03764_I4	633-2	SOCG_04492_I4	633-2	SPAC1805.15c_I3	639-2	SJAG_01360_I2	631-2
SPOG_01057_I2	185-0	SOCG_00968_I2	185-0	SPAC1834.06c_I2	185-0	SJAG_00333_I2	185-0
SPOG_01056_I2	71-1	SOCG_00969_I2	71-1	SPAC1834.07_I2	71-1	SJAG_00332_I2	71-1
SPOG_01056_I3	95-0	SOCG_00969_I3	95-0	SPAC1834.07_I3	95-0	SJAG_00332_I3	95-0
SPOG_01056_I4	147-1	SOCG_00969_I4	147-1	SPAC1834.07_I4	147-1	SJAG_00332_I4	147-1
SPOG_01678_I1	8-2	SOCG_00819_I1	8-2	SPAC1851.03_I1	8-2	SJAG_00142_I1	8-2
SPOG_01678_I2	101-0	SOCG_00819_I2	101-0	SPAC1851.03_I2	101-0	SJAG_00142_I2	101-0
SPOG_01972_I1	22-1	SOCG_00533_I1	22-1	SPAC18B11.04_I1	22-1	SJAG_00296_I1	22-1
SPOG_01972_I2	33-1	SOCG_00533_I2	33-1	SPAC18B11.04_I2	33-1	SJAG_00296_I2	33-1
SPOG_01972_I3	147-0	SOCG_00533_I3	147-0	SPAC18B11.04_I3	147-0	SJAG_00296_I3	147-0
SPOG_00206_I1	143-1	SOCG_04334_I1	143-1	SPAC18G6.03_I1	143-1	SJAG_03915_I1	143-1
SPOG_00206_I2	170-1	SOCG_04334_I2	170-1	SPAC18G6.03_I2	170-1	SJAG_03915_I2	170-1
SPOG_00217_I1	14-0	SOCG_04323_I1	14-0	SPAC18G6.15_I1	14-0	SJAG_02045_I1	14-0
SPOG_01901_I1	38-0	SOCG_00605_I1	38-0	SPAC1952.02_I1	60-0	SJAG_02775_I1	38-0
SPOG_01902_I1	120-0	SOCG_00604_I1	120-0	SPAC1952.03_I1	144-0	SJAG_02774_I1	115-0
SPOG_01912_I1	20-0	SOCG_00594_I1	20-0	SPAC1952.13_I1	20-0	SJAG_02763_I1	20-0
SPOG_01689_I1	43-1	SOCG_00808_I1	43-1	SPAC19A8.04_I1	45-1	SJAG_03249_I1	43-1
SPOG_00319_I3	67-1	SOCG_04222_I3	67-1	SPAC19A8.09_I3	64-1	SJAG_05013_I2	64-1
SPOG_01685_I1	14-0	SOCG_00812_I1	14-0	SPAC19A8.16_I1	14-0	SJAG_03253_I1	14-0
SPOG_01785_I1	28-0	SOCG_00712_I1	13-0	SPAC19B12.04_I1	13-0	SJAG_01287_I1	13-0
SPOG_01784_I2	118-2	SOCG_00713_I2	118-2	SPAC19B12.05c_I2	118-2	SJAG_01286_I2	118-2
SPOG_01783_I1	63-1	SOCG_00714_I1	63-1	SPAC19B12.06c_I1	63-1	SJAG_01285_I1	53-1
SPOG_00964_I1	7-1	SOCG_01057_I1	7-1	SPAC19D5.05c_I1	7-1	SJAG_02372_I1	7-1
SPOG_00964_I2	176-0	SOCG_01057_I2	176-0	SPAC19D5.05c_I2	176-0	SJAG_02372_I2	176-0
SPOG_00542_I1	82-2	SOCG_02282_I1	82-2	SPAC19E9.01c_I1	95-2	SJAG_03593_I1	83-2
SPOG_02643_I1	80-1	SOCG_03039_I1	80-1	SPAC19G12.01c_I1	80-1	SJAG_02186_I1	79-1
SPOG_02643_I3	194-2	SOCG_03039_I3	194-2	SPAC19G12.01c_I3	194-2	SJAG_02186_I3	193-2
SPOG_02642_I6	719-1	SOCG_03038_I6	719-1	SPAC19G12.02c_I3	717-1	SJAG_02187_I7	694-1
SPOG_02628_I1	533-2	SOCG_03025_I1	532-2	SPAC19G12.14_I1	584-2	SJAG_01863_I1	534-2
SPOG_02628_I2	570-0	SOCG_03025_I2	569-0	SPAC19G12.14_I2	621-0	SJAG_01863_I2	571-0
SPOG_02632_I1	10-2	SOCG_03029_I1	10-2	SPAC19G12.17_I1	10-2	SJAG_01867_I1	10-2
SPOG_02632_I2	17-0	SOCG_03029_I2	17-0	SPAC19G12.17_I2	17-0	SJAG_01867_I2	17-0
SPOG_02632_I3	37-1	SOCG_03029_I3	37-1	SPAC19G12.17_I3	37-1	SJAG_01867_I3	37-1
SPOG_02632_I5	82-1	SOCG_03029_I5	82-1	SPAC19G12.17_I5	82-1	SJAG_01867_I5	81-1
SPOG_02082_I4	361-1	SOCG_00421_I4	361-1	SPAC1B1.04c_I4	358-1	SJAG_01910_I4	374-1
SPOG_02082_I5	543-2	SOCG_00421_I5	543-2	SPAC1B1.04c_I5	540-2	SJAG_01910_I5	555-2
SPOG_02082_I6	639-0	SOCG_00421_I6	639-0	SPAC1B1.04c_I6	633-0	SJAG_01910_I6	635-0
SPOG_02082_I7	663-0	SOCG_00421_I7	663-0	SPAC1B1.04c_I7	657-0	SJAG_01910_I7	659-0
SPOG_01881_I1	22-0	SOCG_00622_I1	22-0	SPAC1B3.02c_I1	22-0	SJAG_06390_I1	22-0
SPOG_01881_I2	28-2	SOCG_00622_I2	38-2	SPAC1B3.02c_I2	38-2	SJAG_06390_I2	38-2
SPOG_01881_I3	52-1	SOCG_00622_I3	62-1	SPAC1B3.02c_I3	62-1	SJAG_06390_I3	62-1
SPOG_01883_I1	165-0	SOCG_00620_I1	165-0	SPAC1B3.04c_I1	165-0	SJAG_06388_I1	160-0
SPOG_01884_I1	8-1	SOCG_00619_I1	8-1	SPAC1B3.05_I1	8-1	SJAG_04348_I1	8-1
SPOG_01884_I2	20-0	SOCG_00619_I2	20-0	SPAC1B3.05_I2	20-0	SJAG_04348_I2	20-0
SPOG_01884_I3	85-0	SOCG_00619_I3	85-0	SPAC1B3.05_I3	85-0	SJAG_04348_I3	85-0
SPOG_01896_I1	6-2	SOCG_00610_I1	6-2	SPAC1B3.14_I1	6-2	SJAG_02782_I1	6-2
SPOG_01896_I2	8-2	SOCG_00610_I2	8-2	SPAC1B3.14_I2	8-2	SJAG_02782_I2	8-2
SPOG_01896_I3	52-2	SOCG_00610_I3	52-2	SPAC1B3.14_I3	52-2	SJAG_02782_I3	52-2
SPOG_00288_I2	324-1	SOCG_04251_I2	325-1	SPAC1B9.02c_I2	311-1	SJAG_02426_I2	301-1
SPOG_04084_I2	239-0	SOCG_01928_I2	239-0	SPAC1D4.06c_I2	240-0	SJAG_01000_I1	243-0
SPOG_04086_I1	5-1	SOCG_01926_I1	5-1	SPAC1D4.09c_I1	5-1	SJAG_00998_I1	5-1
SPOG_04086_I2	143-0	SOCG_01926_I2	143-0	SPAC1D4.09c_I2	143-0	SJAG_00998_I2	142-0
SPOG_04086_I3	184-0	SOCG_01926_I3	186-0	SPAC1D4.09c_I3	184-0	SJAG_00998_I3	183-0
SPOG_02727_I3	190-1	SOCG_03122_I3	190-1	SPAC1F12.08_I3	193-1	SJAG_05277_I2	115-1
SPOG_04070_I1	89-0	SOCG_01942_I1	89-0	SPAC1F3.01_I1	89-0	SJAG_03745_I1	89-0
SPOG_04072_I3	181-1	SOCG_01940_I3	181-1	SPAC1F3.03_I2	178-1	SJAG_03754_I3	178-1
SPOG_04073_I1	67-2	SOCG_01939_I1	66-2	SPAC1F3.04c_I1	68-2	SJAG_03755_I1	73-2
SPOG_04074_I2	44-2	SOCG_01938_I2	44-2	SPAC1F3.05_I2	41-2	SJAG_03756_I2	44-2
SPOG_04074_I3	69-0	SOCG_01938_I3	69-0	SPAC1F3.05_I3	66-0	SJAG_03756_I3	69-0
SPOG_01980_I1	12-1	SOCG_00525_I1	12-1	SPAC1F5.03c_I1	12-1	SJAG_00287_I1	13-1
SPOG_01992_I2	30-1	SOCG_00513_I2	30-1	SPAC1F5.10_I2	30-1	SJAG_02879_I1	30-1
SPOG_02567_I1	24-2	SOCG_02965_I1	24-2	SPAC1F7.04_I1	24-2	SJAG_04666_I1	24-2
SPOG_02566_I1	7-1	SOCG_02964_I1	7-1	SPAC1F7.05_I1	7-1	SJAG_04665_I1	17-1
SPOG_01121_I1	43-1	SOCG_00907_I1	43-1	SPAC20G4.01_I1	42-1	SJAG_01944_I1	49-1
SPOG_01121_I2	83-1	SOCG_00907_I2	83-1	SPAC20G4.01_I2	82-1	SJAG_01944_I2	89-1
SPOG_01124_I1	15-1	SOCG_00904_I1	15-1	SPAC20G4.04c_I1	15-1	SJAG_03026_I1	32-1
SPOG_01124_I2	51-2	SOCG_00904_I2	51-2	SPAC20G4.04c_I2	51-2	SJAG_03026_I2	68-2
SPOG_01124_I3	55-0	SOCG_00904_I3	55-0	SPAC20G4.04c_I3	55-0	SJAG_03026_I3	72-0
SPOG_01124_I4	254-1	SOCG_00904_I4	254-1	SPAC20G4.04c_I4	254-1	SJAG_03026_I4	271-1
SPOG_01126_I1	1-0	SOCG_00902_I1	1-0	SPAC20G4.06c_I1	1-0	SJAG_03025_I1	1-0
SPOG_01126_I2	37-1	SOCG_00902_I2	37-1	SPAC20G4.06c_I2	37-1	SJAG_03025_I2	37-1
SPOG_00528_I2	205-0	SOCG_02297_I2	204-0	SPAC20G8.01_I2	197-0	SJAG_00198_I2	161-0
SPOG_00524_I2	58-2	SOCG_02301_I2	58-2	SPAC20G8.05c_I2	58-2	SJAG_03596_I2	59-2
SPOG_00521_I1	539-0	SOCG_02305_I1	536-0	SPAC20G8.08c_I1	538-0	SJAG_01878_I2	517-0
SPOG_00521_I2	584-0	SOCG_02305_I2	581-0	SPAC20G8.08c_I2	583-0	SJAG_01878_I3	562-0
SPOG_00521_I3	895-0	SOCG_02305_I3	892-0	SPAC20G8.08c_I4	894-0	SJAG_01878_I5	873-0
SPOG_00520_I1	19-0	SOCG_02306_I1	19-0	SPAC20G8.09c_I1	19-0	SJAG_01877_I1	19-0
SPOG_00520_I2	68-2	SOCG_02306_I2	68-2	SPAC20G8.09c_I2	68-2	SJAG_01877_I2	68-2
SPOG_00162_I1	23-0	SOCG_04377_I1	23-0	SPAC20H4.03c_I1	23-0	SJAG_02691_I1	23-0
SPOG_00162_I2	44-0	SOCG_04377_I2	44-0	SPAC20H4.03c_I2	44-0	SJAG_02691_I2	44-0
SPOG_00164_I1	38-2	SOCG_04375_I1	38-2	SPAC20H4.05c_I1	41-2	SJAG_02689_I1	40-2
SPOG_00164_I2	46-2	SOCG_04375_I2	46-2	SPAC20H4.05c_I2	49-2	SJAG_02689_I2	48-2
SPOG_00164_I3	72-2	SOCG_04375_I3	72-2	SPAC20H4.05c_I3	75-2	SJAG_02689_I3	74-2
SPOG_00164_I4	98-2	SOCG_04375_I4	98-2	SPAC20H4.05c_I4	101-2	SJAG_02689_I4	100-2
SPOG_00164_I5	157-1	SOCG_04375_I5	157-1	SPAC20H4.05c_I5	160-1	SJAG_02689_I5	159-1
SPOG_00168_I1	31-1	SOCG_04371_I1	31-1	SPAC20H4.09_I1	31-1	SJAG_02686_I1	31-1
SPOG_00168_I2	57-1	SOCG_04371_I2	57-1	SPAC20H4.09_I2	57-1	SJAG_02686_I2	57-1
SPOG_00168_I3	78-0	SOCG_04371_I3	78-0	SPAC20H4.09_I3	78-0	SJAG_02686_I3	78-0
SPOG_00168_I4	164-2	SOCG_04371_I4	164-2	SPAC20H4.09_I4	164-2	SJAG_02686_I4	164-2
SPOG_00168_I5	424-0	SOCG_04371_I5	424-0	SPAC20H4.09_I5	421-0	SJAG_02686_I5	424-0
SPOG_00169_I1	6-0	SOCG_04370_I1	6-0	SPAC20H4.10_I1	6-0	SJAG_02685_I1	6-0
SPOG_00170_I1	24-2	SOCG_04369_I1	24-2	SPAC20H4.11c_I1	24-2	SJAG_02684_I1	24-2
SPOG_02554_I1	71-2	SOCG_02951_I1	71-2	SPAC21E11.05c_I1	71-2	SJAG_02308_I1	71-2
SPOG_02554_I2	376-2	SOCG_02951_I2	374-2	SPAC21E11.05c_I2	376-2	SJAG_02308_I2	372-2
SPOG_02552_I1	66-0	SOCG_02949_I1	66-0	SPAC21E11.07_I1	65-0	SJAG_02306_I1	67-0
SPOG_00709_I1	34-2	SOCG_02116_I1	34-2	SPAC222.03c_I1	34-2	SJAG_00687_I1	34-2
SPOG_00704_I2	54-1	SOCG_02121_I2	54-1	SPAC222.07c_I2	52-1	SJAG_00690_I2	36-1
SPOG_00704_I3	236-2	SOCG_02121_I3	239-2	SPAC222.07c_I3	230-2	SJAG_00690_I3	219-2
SPOG_00698_I1	173-2	SOCG_02128_I1	174-2	SPAC222.13c_I1	162-2	SJAG_02596_I1	146-2
SPOG_00698_I2	281-0	SOCG_02128_I2	282-0	SPAC222.13c_I2	270-0	SJAG_02596_I2	254-0
SPOG_00698_I3	553-0	SOCG_02128_I3	554-0	SPAC222.13c_I3	544-0	SJAG_02596_I3	528-0
SPOG_00697_I1	51-1	SOCG_02129_I1	51-1	SPAC222.14c_I1	53-1	SJAG_02595_I1	48-1
SPOG_00697_I2	76-1	SOCG_02129_I2	76-1	SPAC222.14c_I2	78-1	SJAG_02595_I2	73-1
SPOG_00697_I3	104-0	SOCG_02129_I3	104-0	SPAC222.14c_I3	106-0	SJAG_02595_I3	101-0
SPOG_00696_I1	17-1	SOCG_02130_I1	17-1	SPAC222.15_I1	17-1	SJAG_04950_I1	18-1
SPOG_00696_I2	35-1	SOCG_02130_I2	35-1	SPAC222.15_I2	35-1	SJAG_04950_I2	36-1
SPOG_00696_I3	69-1	SOCG_02130_I3	69-1	SPAC222.15_I3	69-1	SJAG_04950_I3	70-1
SPOG_00708_I1	12-2	SOCG_02117_I1	12-2	SPAC222.19_I1	12-2	SJAG_00688_I1	13-2
SPOG_01531_I1	15-2	SOCG_02471_I1	15-2	SPAC227.07c_I1	15-2	SJAG_00526_I1	11-2
SPOG_01531_I2	29-1	SOCG_02471_I2	29-1	SPAC227.07c_I2	29-1	SJAG_00526_I2	25-1
SPOG_01531_I3	458-0	SOCG_02471_I3	458-0	SPAC227.07c_I3	456-0	SJAG_00526_I3	450-0
SPOG_01530_I1	57-2	SOCG_02472_I1	57-2	SPAC227.08c_I1	57-2	SJAG_00527_I1	58-2
SPOG_01520_I1	33-0	SOCG_02480_I1	33-0	SPAC227.16c_I1	33-0	SJAG_00536_I1	33-0
SPOG_01520_I2	53-2	SOCG_02480_I2	53-2	SPAC227.16c_I2	53-2	SJAG_00536_I2	53-2
SPOG_01520_I4	147-1	SOCG_02480_I4	147-1	SPAC227.16c_I4	147-1	SJAG_00536_I3	147-1
SPOG_00620_I1	84-2	SOCG_02205_I1	44-2	SPAC22A12.08c_I1	43-2	SJAG_16187_I1	39-2
SPOG_00620_I2	102-2	SOCG_02205_I2	62-2	SPAC22A12.08c_I2	62-2	SJAG_16187_I2	57-2
SPOG_00620_I3	267-2	SOCG_02205_I3	227-2	SPAC22A12.08c_I3	227-2	SJAG_16187_I3	222-2
SPOG_01935_I1	2-2	SOCG_00570_I1	2-2	SPAC22E12.13c_I1	2-2	SJAG_04394_I1	2-2
SPOG_01935_I2	48-0	SOCG_00570_I2	48-0	SPAC22E12.13c_I2	48-0	SJAG_04394_I2	48-0
SPOG_01938_I1	22-0	SOCG_00567_I1	22-0	SPAC22E12.17c_I1	22-0	SJAG_04391_I1	22-0
SPOG_01938_I2	62-2	SOCG_00567_I2	62-2	SPAC22E12.17c_I2	62-2	SJAG_04391_I2	62-2
SPOG_03991_I3	132-2	SOCG_02020_I4	188-2	SPAC22F3.03c_I4	190-2	SJAG_00980_I5	178-2
SPOG_03991_I5	220-0	SOCG_02020_I6	276-0	SPAC22F3.03c_I6	278-0	SJAG_00980_I7	266-0
SPOG_03991_I7	286-1	SOCG_02020_I8	342-1	SPAC22F3.03c_I8	344-1	SJAG_00980_I9	332-1
SPOG_03991_I8	319-1	SOCG_02020_I9	375-1	SPAC22F3.03c_I9	377-1	SJAG_00980_I10	365-1
SPOG_03991_I9	371-0	SOCG_02020_I10	427-0	SPAC22F3.03c_I10	429-0	SJAG_00980_I11	417-0
SPOG_03991_I14	593-2	SOCG_02020_I15	649-2	SPAC22F3.03c_I12	659-2	SJAG_00980_I16	640-2
SPOG_03991_I15	616-0	SOCG_02020_I16	672-0	SPAC22F3.03c_I13	682-0	SJAG_00980_I17	663-0
SPOG_04098_I1	78-1	SOCG_03639_I1	78-1	SPAC22F3.09c_I1	78-1	SJAG_00987_I1	78-1
SPOG_03987_I1	30-0	SOCG_02024_I1	30-0	SPAC22G7.01c_I1	30-0	SJAG_00969_I1	30-0
SPOG_03987_I2	49-2	SOCG_02024_I2	49-2	SPAC22G7.01c_I2	49-2	SJAG_00969_I2	49-2
SPOG_03986_I7	963-2	SOCG_02025_I7	963-2	SPAC22G7.02_I7	961-2	SJAG_00968_I7	963-2
SPOG_03984_I2	39-0	SOCG_02027_I2	39-0	SPAC22G7.04_I2	39-0	SJAG_00966_I2	39-0
SPOG_03984_I3	95-2	SOCG_02027_I3	95-2	SPAC22G7.04_I3	95-2	SJAG_00966_I3	95-2
SPOG_03984_I4	137-0	SOCG_02027_I4	137-0	SPAC22G7.04_I4	137-0	SJAG_00966_I4	137-0
SPOG_03979_I3	257-2	SOCG_02032_I3	228-2	SPAC22G7.09c_I3	250-2	SJAG_00962_I3	188-2
SPOG_03979_I4	293-0	SOCG_02032_I4	264-0	SPAC22G7.09c_I4	286-0	SJAG_00962_I4	224-0
SPOG_03979_I5	391-1	SOCG_02032_I5	362-1	SPAC22G7.09c_I5	384-1	SJAG_00962_I5	322-1
SPOG_00275_I2	49-0	SOCG_04264_I2	49-0	SPAC22H10.02_I2	49-0	SJAG_01788_I2	51-0
SPOG_00276_I1	36-1	SOCG_04263_I1	36-1	SPAC22H10.03c_I1	36-1	SJAG_01789_I1	31-1
SPOG_00276_I3	775-0	SOCG_04263_I3	775-0	SPAC22H10.03c_I2	776-0	SJAG_01789_I3	770-0
SPOG_00277_I1	54-2	SOCG_04262_I1	54-2	SPAC22H10.04_I1	54-2	SJAG_01790_I1	54-2
SPOG_00277_I2	78-1	SOCG_04262_I2	78-1	SPAC22H10.04_I2	78-1	SJAG_01790_I2	78-1
SPOG_00278_I1	25-0	SOCG_04261_I1	25-0	SPAC22H10.05c_I1	24-0	SJAG_01791_I1	24-0
SPOG_00281_I2	451-0	SOCG_04258_I2	451-0	SPAC22H10.08_I1	453-0	SJAG_02673_I2	462-0
SPOG_00285_I1	41-2	SOCG_04254_I1	41-2	SPAC22H10.12c_I1	41-2	SJAG_02422_I1	41-2
SPOG_00734_I1	14-0	SOCG_02089_I1	14-0	SPAC22H12.02_I1	14-0	SJAG_00735_I1	14-0
SPOG_00734_I3	121-0	SOCG_02089_I3	119-0	SPAC22H12.02_I3	121-0	SJAG_00735_I3	120-0
SPOG_00733_I1	96-2	SOCG_02090_I1	96-2	SPAC22H12.03_I1	96-2	SJAG_00734_I1	100-2
SPOG_02621_I1	5-0	SOCG_03018_I1	5-0	SPAC23A1.06c_I1	5-0	SJAG_01855_I1	5-0
SPOG_02621_I2	67-2	SOCG_03018_I2	67-2	SPAC23A1.06c_I2	73-2	SJAG_01855_I2	72-2
SPOG_02621_I3	99-0	SOCG_03018_I3	99-0	SPAC23A1.06c_I3	105-0	SJAG_01855_I3	104-0
SPOG_02615_I1	20-1	SOCG_03012_I1	20-1	SPAC23A1.12c_I1	20-1	SJAG_02206_I1	20-1
SPOG_00171_I1	88-0	SOCG_04368_I1	89-0	SPAC23C11.01_I1	88-0	SJAG_02683_I2	100-0
SPOG_00171_I2	193-0	SOCG_04368_I2	194-0	SPAC23C11.01_I2	193-0	SJAG_02683_I3	204-0
SPOG_00171_I3	255-0	SOCG_04368_I3	256-0	SPAC23C11.01_I3	255-0	SJAG_02683_I4	266-0
SPOG_00171_I4	293-2	SOCG_04368_I4	294-2	SPAC23C11.01_I4	293-2	SJAG_02683_I5	304-2
SPOG_00177_I1	33-0	SOCG_04362_I1	33-0	SPAC23C11.08_I1	33-0	SJAG_05247_I1	33-0
SPOG_00177_I2	54-1	SOCG_04362_I2	54-1	SPAC23C11.08_I2	54-1	SJAG_05247_I2	54-1
SPOG_00180_I1	16-1	SOCG_04359_I1	16-1	SPAC23C11.11_I1	16-1	SJAG_01799_I1	16-1
SPOG_00180_I2	109-0	SOCG_04359_I2	109-0	SPAC23C11.11_I2	109-0	SJAG_01799_I2	109-0
SPOG_00677_I3	105-0	SOCG_02149_I2	81-0	SPAC23C4.02_I3	105-0	SJAG_00677_I3	105-0
SPOG_00677_I4	135-2	SOCG_02149_I3	111-2	SPAC23C4.02_I4	135-2	SJAG_00677_I4	135-2
SPOG_00671_I1	22-1	SOCG_02154_I1	22-1	SPAC23C4.08_I1	22-1	SJAG_02366_I1	22-1
SPOG_00671_I2	46-2	SOCG_02154_I2	46-2	SPAC23C4.08_I2	46-2	SJAG_02366_I2	46-2
SPOG_00670_I3	72-1	SOCG_02155_I3	72-1	SPAC23C4.09c_I3	74-1	SJAG_02367_I3	73-1
SPOG_00670_I4	115-0	SOCG_02155_I4	115-0	SPAC23C4.09c_I4	117-0	SJAG_02367_I4	116-0
SPOG_00667_I1	63-2	SOCG_02158_I1	73-2	SPAC23C4.12_I1	55-2	SJAG_02104_I1	55-2
SPOG_00665_I2	205-2	SOCG_02160_I2	205-2	SPAC23C4.14_I2	206-2	SJAG_02102_I2	208-2
SPOG_00664_I1	25-0	SOCG_02161_I1	25-0	SPAC23C4.15_I1	25-0	SJAG_02101_I1	26-0
SPOG_00664_I2	53-2	SOCG_02161_I2	53-2	SPAC23C4.15_I2	53-2	SJAG_02101_I2	54-2
SPOG_00662_I2	48-2	SOCG_02163_I2	24-2	SPAC23C4.17_I2	24-2	SJAG_02099_I2	25-2
SPOG_00662_I3	431-2	SOCG_02163_I3	407-2	SPAC23C4.17_I3	409-2	SJAG_02099_I4	380-2
SPOG_00662_I4	517-2	SOCG_02163_I4	494-2	SPAC23C4.17_I4	498-2	SJAG_02099_I5	474-2
SPOG_00662_I5	694-2	SOCG_02163_I5	671-2	SPAC23C4.17_I5	674-2	SJAG_02099_I6	650-2
SPOG_00661_I1	22-0	SOCG_02164_I1	22-0	SPAC23C4.18c_I1	22-0	SJAG_02098_I1	22-0
SPOG_00661_I2	58-0	SOCG_02164_I2	58-0	SPAC23C4.18c_I2	58-0	SJAG_02098_I2	58-0
SPOG_00376_I1	25-2	SOCG_04165_I1	25-2	SPAC23D3.02_I1	25-2	SJAG_01010_I1	26-2
SPOG_00372_I1	17-2	SOCG_04169_I1	17-2	SPAC23D3.07_I1	17-2	SJAG_01014_I1	20-2
SPOG_00372_I2	66-1	SOCG_04169_I2	66-1	SPAC23D3.07_I2	66-1	SJAG_01014_I2	69-1
SPOG_00365_I1	78-0	SOCG_04177_I1	85-0	SPAC23D3.14c_I1	85-0	SJAG_01029_I1	79-0
SPOG_00365_I2	183-0	SOCG_04177_I2	190-0	SPAC23D3.14c_I2	190-0	SJAG_01029_I2	184-0
SPOG_05116_I1	12-2	SOCG_04174_I1	12-2	SPAC23D3.16_I1	12-2	SJAG_01032_I1	12-2
SPOG_05116_I2	31-1	SOCG_04174_I2	31-1	SPAC23D3.16_I2	31-1	SJAG_01032_I2	31-1
SPOG_00367_I1	34-0	SOCG_04175_I1	34-0	SPAC23D3.17_I1	33-0	SJAG_05558_I1	25-0
SPOG_00367_I2	62-2	SOCG_04175_I2	62-2	SPAC23D3.17_I2	61-2	SJAG_05558_I2	53-2
SPOG_03939_I1	6-1	SOCG_02073_I1	6-1	SPAC23G3.01_I1	6-1	SJAG_04030_I1	6-1
SPOG_03934_I1	6-1	SOCG_02078_I1	6-1	SPAC23G3.06_I1	6-1	SJAG_00744_I1	6-1
SPOG_00737_I1	59-2	SOCG_02086_I1	59-2	SPAC23G3.11_I1	59-2	SJAG_00738_I1	59-2
SPOG_00737_I2	87-1	SOCG_02086_I2	87-1	SPAC23G3.11_I2	87-1	SJAG_00738_I2	87-1
SPOG_01693_I1	4-1	SOCG_00804_I1	4-1	SPAC23H3.02c_I1	4-1	SJAG_03245_I1	4-1
SPOG_01693_I2	22-1	SOCG_00804_I2	22-1	SPAC23H3.02c_I2	22-1	SJAG_03245_I2	22-1
SPOG_01693_I3	104-2	SOCG_00804_I3	104-2	SPAC23H3.02c_I3	104-2	SJAG_03245_I3	104-2
SPOG_01704_I1	41-1	SOCG_00792_I1	41-1	SPAC23H3.13c_I1	41-1	SJAG_02444_I1	45-1
SPOG_01706_I2	54-0	SOCG_00790_I2	54-0	SPAC23H3.14_I2	54-0	SJAG_02443_I2	54-0
SPOG_04887_I1	107-1	SOCG_02390_I1	107-1	SPAC23H4.03c_I1	108-1	SJAG_00357_I1	104-1
SPOG_04888_I2	54-0	SOCG_02389_I2	54-0	SPAC23H4.04_I2	54-0	SJAG_00358_I1	17-0
SPOG_04891_I1	21-1	SOCG_02385_I1	21-1	SPAC23H4.08_I1	21-1	SJAG_00383_I1	21-1
SPOG_04898_I4	880-2	SOCG_02378_I4	880-2	SPAC23H4.14_I4	882-2	SJAG_05184_I4	868-2
SPOG_04901_I1	332-2	SOCG_02375_I1	332-2	SPAC23H4.17c_I1	328-2	SJAG_00342_I1	329-2
SPOG_04902_I1	25-0	SOCG_02374_I1	25-0	SPAC23H4.18c_I1	25-0	SJAG_00341_I1	26-0
SPOG_04902_I2	75-0	SOCG_02374_I2	75-0	SPAC23H4.18c_I2	75-0	SJAG_00341_I2	76-0
SPOG_04902_I3	106-1	SOCG_02374_I3	106-1	SPAC23H4.18c_I3	106-1	SJAG_00341_I3	107-1
SPOG_01999_I1	125-0	SOCG_00506_I1	125-0	SPAC24B11.12c_I1	124-0	SJAG_02897_I1	122-0
SPOG_03867_I2	587-0	SOCG_01665_I2	576-0	SPAC24C9.11_I2	578-0	SJAG_03583_I2	568-0
SPOG_03869_I1	67-0	SOCG_01663_I1	67-0	SPAC24C9.13c_I1	67-0	SJAG_01767_I1	67-0
SPOG_03871_I1	266-2	SOCG_01661_I1	251-2	SPAC24C9.15c_I1	187-2	SJAG_01769_I1	148-2
SPOG_01541_I1	83-2	SOCG_02460_I1	83-2	SPAC24H6.02c_I1	84-2	SJAG_16182_I1	77-2
SPOG_01542_I1	14-0	SOCG_02459_I1	14-0	SPAC24H6.03_I1	14-0	SJAG_06385_I1	16-0
SPOG_01542_I2	475-2	SOCG_02459_I2	474-2	SPAC24H6.03_I2	476-2	SJAG_06385_I2	468-2
SPOG_01542_I3	512-1	SOCG_02459_I3	511-1	SPAC24H6.03_I3	513-1	SJAG_06385_I3	505-1
SPOG_00391_I1	18-1	SOCG_04151_I1	18-1	SPAC25G10.05c_I1	18-1	SJAG_04747_I1	18-1
SPOG_00390_I1	23-2	SOCG_04152_I1	23-2	SPAC25G10.06_I1	23-2	SJAG_04746_I1	23-2
SPOG_00476_I1	12-0	SOCG_04835_I1	12-0	SPAC26A3.06_I1	12-0	SJAG_02281_I1	12-0
SPOG_00476_I2	25-2	SOCG_04835_I2	25-2	SPAC26A3.06_I2	25-2	SJAG_02281_I2	25-2
SPOG_00478_I1	1-0	SOCG_04833_I1	1-0	SPAC26A3.08_I1	1-0	SJAG_02279_I1	1-0
SPOG_00483_I1	1-0	SOCG_04828_I1	1-0	SPAC26A3.14c_I1	1-0	SJAG_05261_I1	1-0
SPOG_00483_I2	31-2	SOCG_04828_I2	31-2	SPAC26A3.14c_I2	31-2	SJAG_05261_I2	31-2
SPOG_00982_I1	6-0	SOCG_01041_I1	6-0	SPAC26F1.12c_I1	6-0	SJAG_02014_I1	6-0
SPOG_00982_I2	324-2	SOCG_01041_I2	324-2	SPAC26F1.12c_I2	324-2	SJAG_02014_I2	324-2
SPOG_02608_I1	200-1	SOCG_03005_I1	200-1	SPAC26H5.02c_I1	198-1	SJAG_02199_I1	201-1
SPOG_02608_I2	210-2	SOCG_03005_I2	210-2	SPAC26H5.02c_I2	208-2	SJAG_02199_I2	211-2
SPOG_02608_I3	216-2	SOCG_03005_I3	216-2	SPAC26H5.02c_I3	214-2	SJAG_02199_I3	217-2
SPOG_02607_I2	81-1	SOCG_03004_I2	81-1	SPAC26H5.03_I2	79-1	SJAG_02198_I2	79-1
SPOG_02607_I3	162-1	SOCG_03004_I3	162-1	SPAC26H5.03_I3	160-1	SJAG_02198_I3	160-1
SPOG_02604_I2	64-1	SOCG_03001_I2	105-1	SPAC26H5.06_I2	64-1	SJAG_02194_I2	61-1
SPOG_02650_I1	385-1	SOCG_03046_I1	387-1	SPAC27E2.05_I1	381-1	SJAG_04877_I1	377-1
SPOG_01001_I1	29-1	SOCG_01023_I1	29-1	SPAC29A4.18_I1	29-1	SJAG_04758_I1	29-1
SPOG_01001_I2	64-2	SOCG_01023_I2	64-2	SPAC29A4.18_I2	64-2	SJAG_04758_I2	64-2
SPOG_00351_I1	68-2	SOCG_04191_I1	69-2	SPAC29E6.08_I1	68-2	SJAG_00421_I1	68-2
SPOG_02550_I1	2-2	SOCG_02947_I1	2-2	SPAC2C4.03c_I1	2-2	SJAG_02304_I1	2-2
SPOG_02550_I2	36-1	SOCG_02947_I2	36-1	SPAC2C4.03c_I2	36-1	SJAG_02304_I2	36-1
SPOG_02550_I3	73-0	SOCG_02947_I3	73-0	SPAC2C4.03c_I3	73-0	SJAG_02304_I3	73-0
SPOG_00407_I1	46-1	SOCG_04135_I1	46-1	SPAC2C4.06c_I1	46-1	SJAG_06273_I1	46-1
SPOG_00407_I2	65-0	SOCG_04135_I2	65-0	SPAC2C4.06c_I2	65-0	SJAG_06273_I2	65-0
SPOG_00404_I2	208-2	SOCG_04138_I2	210-2	SPAC2C4.09_I2	203-2	SJAG_03873_I2	198-2
SPOG_02676_I1	36-0	SOCG_03071_I1	36-0	SPAC2F3.06c_I1	36-0	SJAG_03959_I1	36-0
SPOG_02675_I4	163-1	SOCG_03070_I4	164-1	SPAC2F3.08_I1	160-1	SJAG_16231_I3	157-1
SPOG_02669_I1	44-1	SOCG_03065_I1	44-1	SPAC2F3.11_I1	40-1	SJAG_03964_I1	40-1
SPOG_02668_I2	333-2	SOCG_05046_I2	337-2	SPAC2F3.13c_I2	337-2	SJAG_06284_I2	333-2
SPOG_02668_I4	482-2	SOCG_05046_I4	486-2	SPAC2F3.13c_I4	492-2	SJAG_06284_I4	499-2
SPOG_02668_I5	511-2	SOCG_05046_I5	515-2	SPAC2F3.13c_I5	521-2	SJAG_06284_I5	528-2
SPOG_02668_I6	536-0	SOCG_05046_I6	540-0	SPAC2F3.13c_I6	546-0	SJAG_06284_I6	553-0
SPOG_02665_I1	312-0	SOCG_03061_I1	309-0	SPAC2F3.15_I1	316-0	SJAG_06286_I1	326-0
SPOG_02665_I2	343-1	SOCG_03061_I2	340-1	SPAC2F3.15_I2	347-1	SJAG_06286_I2	357-1
SPOG_02665_I3	570-2	SOCG_03061_I3	567-2	SPAC2F3.15_I3	573-2	SJAG_06286_I3	584-2
SPOG_02664_I1	101-0	SOCG_03060_I1	101-0	SPAC2F3.16_I1	100-0	SJAG_03967_I1	105-0
SPOG_02671_I1	10-1	SOCG_03067_I1	10-1	SPAC2F3.18c_I1	10-1	SJAG_03962_I1	10-1
SPOG_02671_I2	64-0	SOCG_03067_I2	64-0	SPAC2F3.18c_I2	64-0	SJAG_03962_I2	64-0
SPOG_03953_I1	8-0	SOCG_02059_I1	8-0	SPAC2G11.06_I1	8-0	SJAG_03892_I1	8-0
SPOG_03953_I2	46-1	SOCG_02059_I2	46-1	SPAC2G11.06_I2	46-1	SJAG_03892_I2	46-1
SPOG_03953_I3	208-2	SOCG_02059_I3	207-2	SPAC2G11.06_I3	208-2	SJAG_03892_I3	212-2
SPOG_03952_I1	112-1	SOCG_02060_I1	110-1	SPAC2G11.07c_I1	110-1	SJAG_16245_I1	110-1
SPOG_03952_I2	136-0	SOCG_02060_I2	134-0	SPAC2G11.07c_I2	134-0	SJAG_16245_I2	134-0
SPOG_03949_I1	45-1	SOCG_02063_I1	35-1	SPAC2G11.10c_I1	37-1	SJAG_16244_I1	43-1
SPOG_03945_I2	208-1	SOCG_02067_I2	214-1	SPAC2G11.14_I2	212-1	SJAG_03900_I1	232-1
SPOG_03945_I3	257-0	SOCG_02067_I3	263-0	SPAC2G11.14_I3	261-0	SJAG_03900_I2	281-0
SPOG_03944_I1	57-2	SOCG_02068_I1	57-2	SPAC2G11.15c_I1	57-2	SJAG_03901_I1	71-2
SPOG_03944_I2	96-1	SOCG_02068_I2	96-1	SPAC2G11.15c_I2	96-1	SJAG_03901_I2	110-1
SPOG_00360_I1	58-1	SOCG_04182_I1	58-1	SPAC30.02c_I1	58-1	SJAG_01024_I1	58-1
SPOG_00359_I4	154-0	SOCG_04183_I4	157-0	SPAC30.03c_I4	153-0	SJAG_05214_I4	154-0
SPOG_00359_I5	211-1	SOCG_04183_I5	214-1	SPAC30.03c_I5	210-1	SJAG_05214_I5	211-1
SPOG_01157_I1	14-2	SOCG_00871_I1	14-2	SPAC30C2.05_I1	14-2	SJAG_02264_I1	13-2
SPOG_01157_I2	31-0	SOCG_00871_I2	31-0	SPAC30C2.05_I2	31-0	SJAG_02264_I2	30-0
SPOG_01160_I2	299-2	SOCG_00868_I2	299-2	SPAC30C2.08_I2	300-2	SJAG_00049_I2	296-2
SPOG_01160_I3	331-0	SOCG_00868_I3	331-0	SPAC30C2.08_I3	332-0	SJAG_00049_I3	328-0
SPOG_02791_I1	21-1	SOCG_00206_I1	21-1	SPAC30D10.21_I1	21-1	SJAG_03099_I1	23-1
SPOG_00634_I2	75-0	SOCG_02191_I2	75-0	SPAC30D11.06c_I2	75-0	SJAG_03725_I2	75-0
SPOG_04521_I1	6-1	SOCG_01554_I1	6-1	SPAC31A2.02_I1	6-1	SJAG_04890_I1	6-1
SPOG_04521_I2	62-0	SOCG_01554_I2	62-0	SPAC31A2.02_I2	62-0	SJAG_04890_I2	62-0
SPOG_04524_I1	33-1	SOCG_01551_I1	33-1	SPAC31A2.05c_I1	37-1	SJAG_00796_I1	33-1
SPOG_04524_I6	1348-0	SOCG_01551_I6	1341-0	SPAC31A2.05c_I6	1343-0	SJAG_00796_I9	1329-0
SPOG_04526_I1	83-1	SOCG_01549_I1	83-1	SPAC31A2.07c_I1	75-1	SJAG_00798_I1	71-1
SPOG_04528_I1	3-0	SOCG_01547_I1	3-0	SPAC31A2.09c_I1	3-0	SJAG_00800_I1	3-0
SPOG_01565_I1	39-0	SOCG_02436_I1	39-0	SPAC31A2.13c_I1	39-0	SJAG_00804_I1	39-0
SPOG_01564_I1	94-1	SOCG_02437_I1	94-1	SPAC31A2.14_I1	94-1	SJAG_00805_I1	96-1
SPOG_03832_I1	38-1	SOCG_01698_I1	38-1	SPAC31G5.01_I1	38-1	SJAG_00504_I1	37-1
SPOG_03843_I1	2-0	SOCG_01687_I1	2-0	SPAC31G5.12c_I1	2-0	SJAG_02898_I1	2-0
SPOG_03843_I2	35-0	SOCG_01687_I2	35-0	SPAC31G5.12c_I2	35-0	SJAG_02898_I2	35-0
SPOG_03847_I4	288-1	SOCG_01683_I4	288-1	SPAC31G5.15_I4	285-1	SJAG_02902_I4	274-1
SPOG_03847_I5	637-0	SOCG_01683_I5	636-0	SPAC31G5.15_I5	633-0	SJAG_02902_I5	619-0
SPOG_03847_I6	696-1	SOCG_01683_I6	695-1	SPAC31G5.15_I6	692-1	SJAG_02902_I6	678-1
SPOG_02685_I4	173-1	SOCG_03080_I4	168-1	SPAC323.06c_I4	168-1	SJAG_03949_I4	167-1
SPOG_02685_I9	492-0	SOCG_03080_I9	487-0	SPAC323.06c_I9	490-0	SJAG_03949_I9	484-0
SPOG_02684_I1	227-2	SOCG_03079_I1	227-2	SPAC323.07c_I1	221-2	SJAG_03950_I1	228-2
SPOG_02051_I1	31-0	SOCG_00452_I1	31-0	SPAC328.01c_I1	31-0	SJAG_01534_I1	31-0
SPOG_02055_I2	118-0	SOCG_00448_I2	117-0	SPAC328.05_I2	117-0	SJAG_01529_I2	127-0
SPOG_02055_I3	152-0	SOCG_00448_I3	151-0	SPAC328.05_I3	151-0	SJAG_01529_I3	161-0
SPOG_02055_I4	185-0	SOCG_00448_I4	184-0	SPAC328.05_I4	185-0	SJAG_01529_I4	198-0
SPOG_02055_I5	319-0	SOCG_00448_I5	318-0	SPAC328.05_I5	316-0	SJAG_01529_I6	333-0
SPOG_00310_I2	194-2	SOCG_04231_I2	207-2	SPAC32A11.01_I2	210-2	SJAG_05004_I2	195-2
SPOG_05264_I1	7-1	SOCG_02407_I1	7-1	SPAC343.03_I1	7-1	SJAG_05236_I1	7-1
SPOG_01591_I1	25-2	SOCG_02408_I1	25-2	SPAC343.04c_I1	25-2	SJAG_01472_I1	25-2
SPOG_01591_I2	75-0	SOCG_02408_I2	75-0	SPAC343.04c_I2	75-0	SJAG_01472_I2	75-0
SPOG_01590_I1	1-0	SOCG_02411_I1	1-0	SPAC343.05_I1	1-0	SJAG_01471_I1	1-0
SPOG_01590_I2	35-1	SOCG_02411_I2	35-1	SPAC343.05_I2	35-1	SJAG_01471_I2	35-1
SPOG_01581_I1	74-1	SOCG_02420_I1	72-1	SPAC343.14c_I1	72-1	SJAG_01576_I1	75-1
SPOG_01577_I1	8-1	SOCG_02424_I1	8-1	SPAC343.18_I1	8-1	SJAG_01572_I1	8-1
SPOG_02050_I1	35-1	SOCG_00453_I1	35-1	SPAC3A11.02_I1	35-1	SJAG_01535_I1	35-1
SPOG_02043_I1	42-1	SOCG_00460_I1	42-1	SPAC3A11.09_I1	42-1	SJAG_01541_I1	42-1
SPOG_02040_I1	51-0	SOCG_00462_I1	51-0	SPAC3A11.12c_I1	51-0	SJAG_01544_I1	52-0
SPOG_02038_I2	647-0	SOCG_00465_I3	744-0	SPAC3A11.14c_I3	778-0	SJAG_01546_I3	673-0
SPOG_04957_I1	17-2	SOCG_02314_I1	17-2	SPAC3A12.07_I1	17-2	SJAG_04894_I1	17-2
SPOG_04957_I2	47-2	SOCG_02314_I2	47-2	SPAC3A12.07_I2	47-2	SJAG_04894_I2	47-2
SPOG_04952_I1	73-2	SOCG_02324_I1	73-2	SPAC3A12.11c_I1	73-2	SJAG_04898_I1	71-2
SPOG_04952_I2	128-2	SOCG_02324_I2	128-2	SPAC3A12.11c_I2	128-2	SJAG_04898_I2	126-2
SPOG_04950_I1	5-1	SOCG_02326_I1	5-1	SPAC3A12.13c_I1	5-1	SJAG_04900_I1	5-1
SPOG_04949_I1	1-0	SOCG_02327_I1	1-0	SPAC3A12.14_I1	1-0	SJAG_04901_I1	1-0
SPOG_00146_I1	6-1	SOCG_04643_I1	6-1	SPAC3C7.03c_I1	6-1	SJAG_02708_I1	7-1
SPOG_03781_I2	102-0	SOCG_01750_I2	102-0	SPAC3F10.09_I2	104-0	SJAG_01346_I2	119-0
SPOG_03781_I3	137-2	SOCG_01750_I3	137-2	SPAC3F10.09_I3	139-2	SJAG_01346_I3	154-2
SPOG_03786_I1	1-0	SOCG_01745_I1	1-0	SPAC3F10.16c_I1	1-0	SJAG_01339_I1	1-0
SPOG_03698_I1	31-0	SOCG_04559_I1	31-0	SPAC3G6.01_I1	64-0	SJAG_01653_I1	63-0
SPOG_03697_I1	11-1	SOCG_04560_I1	11-1	SPAC3G6.02_I1	11-1	SJAG_01652_I1	11-1
SPOG_03697_I2	25-1	SOCG_04560_I2	25-1	SPAC3G6.02_I2	25-1	SJAG_01652_I2	25-1
SPOG_03696_I1	43-0	SOCG_04561_I1	43-0	SPAC3G6.03c_I1	48-0	SJAG_01651_I1	43-0
SPOG_03696_I3	194-0	SOCG_04561_I3	194-0	SPAC3G6.03c_I3	199-0	SJAG_01651_I2	193-0
SPOG_03694_I4	151-0	SOCG_04563_I4	150-0	SPAC3G6.05_I2	150-0	SJAG_01649_I4	150-0
SPOG_03693_I1	5-1	SOCG_04564_I1	5-1	SPAC3G6.06c_I1	5-1	SJAG_01648_I1	5-1
SPOG_03693_I2	35-2	SOCG_04564_I2	35-2	SPAC3G6.06c_I2	35-2	SJAG_01648_I2	35-2
SPOG_03689_I1	219-0	SOCG_04568_I1	219-0	SPAC3G6.11_I1	213-0	SJAG_01644_I1	234-0
SPOG_03921_I1	28-2	SOCG_01612_I1	28-2	SPAC3G9.04_I1	28-2	SJAG_03624_I1	28-2
SPOG_03920_I1	23-1	SOCG_01613_I1	23-1	SPAC3G9.05_I1	23-1	SJAG_03625_I1	23-1
SPOG_03916_I1	24-1	SOCG_01617_I1	24-1	SPAC3G9.09c_I1	24-1	SJAG_03629_I1	24-1
SPOG_03916_I2	81-1	SOCG_01617_I2	81-1	SPAC3G9.09c_I2	81-1	SJAG_03629_I2	81-1
SPOG_03910_I1	100-0	SOCG_01622_I1	100-0	SPAC3G9.13c_I1	100-0	SJAG_04840_I1	110-0
SPOG_03910_I2	127-0	SOCG_01622_I2	127-0	SPAC3G9.13c_I2	127-0	SJAG_04840_I2	137-0
SPOG_03910_I3	170-2	SOCG_01622_I3	170-2	SPAC3G9.13c_I3	170-2	SJAG_04840_I3	180-2
SPOG_02145_I1	12-0	SOCG_00360_I1	12-0	SPAC3H1.01c_I1	12-0	SJAG_05301_I1	12-0
SPOG_02138_I1	301-2	SOCG_00367_I1	305-2	SPAC3H1.09c_I1	299-2	SJAG_03400_I1	295-2
SPOG_02148_I1	71-2	SOCG_00357_I1	41-2	SPAC3H1.13_I1	41-2	SJAG_03386_I1	41-2
SPOG_02148_I3	295-0	SOCG_00357_I3	265-0	SPAC3H1.13_I3	266-0	SJAG_03386_I3	237-0
SPOG_02034_I1	51-0	SOCG_00469_I1	42-0	SPAC3H5.07_I1	42-0	SJAG_01551_I1	42-0
SPOG_01200_I1	69-1	SOCG_01847_I1	69-1	SPAC3H5.11_I1	69-1	SJAG_01566_I1	70-1
SPOG_01200_I4	291-0	SOCG_01847_I4	291-0	SPAC3H5.11_I2	291-0	SJAG_01566_I4	292-0
SPOG_01201_I2	47-0	SOCG_01846_I2	53-0	SPAC3H5.13_I2	55-0	SJAG_01567_I2	70-0
SPOG_04069_I1	53-0	SOCG_01943_I1	53-0	SPAC3H8.10_I1	53-0	SJAG_03746_I1	56-0
SPOG_04069_I2	154-0	SOCG_01943_I2	154-0	SPAC3H8.10_I2	154-0	SJAG_03746_I2	157-0
SPOG_04069_I3	195-0	SOCG_01943_I3	195-0	SPAC3H8.10_I3	195-0	SJAG_03746_I3	198-0
SPOG_01085_I1	39-1	SOCG_00941_I1	39-1	SPAC458.06_I1	39-1	SJAG_00115_I1	39-1
SPOG_01085_I2	72-0	SOCG_00941_I2	72-0	SPAC458.06_I2	72-0	SJAG_00115_I2	72-0
SPOG_01718_I1	14-0	SOCG_00779_I1	14-0	SPAC4A8.02c_I1	11-0	SJAG_02434_I1	14-0
SPOG_01731_I1	5-1	SOCG_00766_I1	5-1	SPAC4A8.15c_I1	5-1	SJAG_04982_I1	5-1
SPOG_01731_I2	116-1	SOCG_00766_I2	116-1	SPAC4A8.15c_I2	116-1	SJAG_04982_I2	116-1
SPOG_00610_I1	16-0	SOCG_02215_I1	16-0	SPAC4C5.01_I1	16-0	SJAG_05029_I1	15-0
SPOG_00610_I2	31-1	SOCG_02215_I2	31-1	SPAC4C5.01_I2	31-1	SJAG_05029_I2	30-1
SPOG_00610_I3	52-1	SOCG_02215_I3	52-1	SPAC4C5.01_I3	52-1	SJAG_05029_I3	51-1
SPOG_00610_I4	83-0	SOCG_02215_I4	83-0	SPAC4C5.01_I4	83-0	SJAG_05029_I4	82-0
SPOG_00609_I1	41-0	SOCG_02216_I1	41-0	SPAC4C5.02c_I1	41-0	SJAG_05030_I1	45-0
SPOG_00609_I2	95-1	SOCG_02216_I2	95-1	SPAC4C5.02c_I2	95-1	SJAG_05030_I2	99-1
SPOG_00609_I3	132-2	SOCG_02216_I3	132-2	SPAC4C5.02c_I3	132-2	SJAG_05030_I3	136-2
SPOG_00607_I1	28-2	SOCG_02218_I1	28-2	SPAC4C5.04_I1	28-2	SJAG_05032_I1	23-2
SPOG_03709_I1	69-0	SOCG_04548_I1	69-0	SPAC4D7.04c_I1	69-0	SJAG_02163_I1	69-0
SPOG_03709_I4	228-0	SOCG_04548_I4	228-0	SPAC4D7.04c_I3	228-0	SJAG_02163_I4	228-0
SPOG_03708_I1	21-0	SOCG_04549_I1	21-0	SPAC4D7.05_I1	21-0	SJAG_02164_I1	21-0
SPOG_03708_I2	62-1	SOCG_04549_I2	62-1	SPAC4D7.05_I2	62-1	SJAG_02164_I2	62-1
SPOG_03704_I1	51-2	SOCG_04553_I1	51-2	SPAC4D7.09_I1	50-2	SJAG_01659_I1	50-2
SPOG_03704_I2	141-0	SOCG_04553_I2	141-0	SPAC4D7.09_I2	140-0	SJAG_01659_I2	140-0
SPOG_03704_I4	333-0	SOCG_04553_I4	333-0	SPAC4D7.09_I4	335-0	SJAG_01659_I4	332-0
SPOG_01806_I1	8-0	SOCG_00692_I1	8-0	SPAC4F10.03c_I1	26-0	SJAG_01269_I1	8-0
SPOG_01802_I1	45-0	SOCG_00696_I1	45-0	SPAC4F10.07c_I1	45-0	SJAG_01274_I1	47-0
SPOG_01799_I2	245-0	SOCG_00699_I2	265-0	SPAC4F10.11_I2	259-0	SJAG_01277_I2	277-0
SPOG_01795_I1	16-1	SOCG_00702_I1	16-1	SPAC4F10.14c_I1	16-1	SJAG_01733_I1	16-1
SPOG_01794_I1	72-0	SOCG_00703_I1	72-0	SPAC4F10.15c_I1	72-0	SJAG_01732_I1	72-0
SPOG_01793_I3	1170-2	SOCG_00704_I3	1176-2	SPAC4F10.16c_I1	1176-2	SJAG_01731_I3	1142-2
SPOG_01790_I1	25-2	SOCG_00707_I1	25-2	SPAC4F10.19c_I1	23-2	SJAG_05223_I1	22-2
SPOG_01772_I1	44-2	SOCG_00725_I1	44-2	SPAC4F8.03_I1	43-2	SJAG_04491_I1	43-2
SPOG_03970_I1	10-2	SOCG_02042_I1	10-2	SPAC4G8.08_I1	10-2	SJAG_04737_I1	10-2
SPOG_03970_I2	140-0	SOCG_02042_I2	140-0	SPAC4G8.08_I2	141-0	SJAG_04737_I2	142-0
SPOG_03966_I1	42-1	SOCG_02046_I1	42-1	SPAC4G8.12c_I1	42-1	SJAG_06274_I1	40-1
SPOG_00236_I2	48-0	SOCG_04304_I2	48-0	SPAC4G9.15_I2	48-0	SJAG_00630_I2	45-0
SPOG_00238_I1	317-1	SOCG_04302_I1	317-1	SPAC4G9.17c_I1	317-1	SJAG_00628_I1	260-1
SPOG_02713_I1	8-2	SOCG_03109_I1	8-2	SPAC4H3.13_I1	11-2	SJAG_02863_I1	11-2
SPOG_00587_I1	121-0	SOCG_02238_I1	121-0	SPAC56E4.05_I1	121-0	SJAG_03315_I1	121-0
SPOG_00530_I1	99-1	SOCG_02295_I1	99-1	SPAC57A10.11c_I1	99-1	SJAG_00196_I1	116-1
SPOG_04919_I1	11-1	SOCG_02358_I1	11-1	SPAC57A7.10c_I1	11-1	SJAG_01508_I1	11-1
SPOG_04921_I1	26-0	SOCG_02356_I1	26-0	SPAC57A7.12_I1	42-0	SJAG_01510_I1	26-0
SPOG_04922_I2	162-0	SOCG_02355_I2	160-0	SPAC57A7.13_I2	163-0	SJAG_01511_I1	34-0
SPOG_04922_I3	356-0	SOCG_02355_I3	354-0	SPAC57A7.13_I3	365-0	SJAG_01511_I2	237-0
SPOG_03883_I1	13-0	SOCG_01648_I1	13-0	SPAC589.05c_I1	13-0	SJAG_01781_I1	13-0
SPOG_03883_I2	63-2	SOCG_01648_I2	63-2	SPAC589.05c_I2	63-2	SJAG_01781_I2	63-2
SPOG_03884_I1	4-0	SOCG_01647_I1	4-0	SPAC589.06c_I1	4-0	SJAG_01782_I1	4-0
SPOG_03885_I2	43-1	SOCG_01646_I2	43-1	SPAC589.07c_I2	38-1	SJAG_01783_I2	43-1
SPOG_03890_I1	41-0	SOCG_01641_I1	41-0	SPAC589.12_I1	41-0	SJAG_01227_I1	41-0
SPOG_04925_I1	46-0	SOCG_02352_I1	46-0	SPAC5D6.04_I1	48-0	SJAG_01514_I1	47-0
SPOG_04925_I3	120-0	SOCG_02352_I3	120-0	SPAC5D6.04_I3	122-0	SJAG_01514_I2	121-0
SPOG_00130_I2	143-2	SOCG_04659_I2	143-2	SPAC607.02c_I2	142-2	SJAG_03419_I2	137-2
SPOG_04516_I2	71-2	SOCG_01559_I2	71-2	SPAC630.14c_I2	99-2	SJAG_04921_I2	70-2
SPOG_00136_I2	135-1	SOCG_04653_I2	135-1	SPAC631.01c_I2	135-1	SJAG_02700_I2	138-1
SPOG_01662_I1	3-0	SOCG_00833_I1	3-0	SPAC637.04_I1	3-0	SJAG_00137_I1	3-0
SPOG_01662_I2	41-1	SOCG_00833_I2	41-1	SPAC637.04_I2	41-1	SJAG_00137_I2	41-1
SPOG_01661_I1	14-2	SOCG_00834_I1	14-2	SPAC637.05c_I1	14-2	SJAG_00136_I1	27-2
SPOG_01661_I2	38-2	SOCG_00834_I2	38-2	SPAC637.05c_I2	38-2	SJAG_00136_I2	51-2
SPOG_01661_I3	54-0	SOCG_00834_I3	54-0	SPAC637.05c_I3	54-0	SJAG_00136_I3	67-0
SPOG_01661_I4	338-1	SOCG_00834_I4	338-1	SPAC637.05c_I4	338-1	SJAG_00136_I4	351-1
SPOG_01656_I1	9-2	SOCG_00839_I1	9-2	SPAC637.10c_I1	9-2	SJAG_02992_I1	9-2
SPOG_01656_I2	58-2	SOCG_00839_I2	58-2	SPAC637.10c_I2	58-2	SJAG_02992_I2	58-2
SPOG_01656_I3	166-2	SOCG_00839_I3	166-2	SPAC637.10c_I3	166-2	SJAG_02992_I3	168-2
SPOG_01775_I1	78-0	SOCG_00722_I1	102-0	SPAC644.04_I1	78-0	SJAG_04488_I1	100-0
SPOG_01871_I1	23-0	SOCG_00632_I1	23-0	SPAC644.08_I1	23-0	SJAG_01404_I1	26-0
SPOG_01867_I1	5-1	SOCG_00636_I1	5-1	SPAC644.12_I1	7-1	SJAG_01408_I1	7-1
SPOG_01867_I2	11-0	SOCG_00636_I2	11-0	SPAC644.12_I2	13-0	SJAG_01408_I2	13-0
SPOG_01867_I3	16-0	SOCG_00636_I3	16-0	SPAC644.12_I3	18-0	SJAG_01408_I3	18-0
SPOG_01867_I4	56-0	SOCG_00636_I4	56-0	SPAC644.12_I4	58-0	SJAG_01408_I4	58-0
SPOG_01861_I1	17-0	SOCG_00642_I1	17-0	SPAC644.18c_I1	17-0	SJAG_01415_I1	17-0
SPOG_01861_I2	49-2	SOCG_00642_I2	49-2	SPAC644.18c_I2	49-2	SJAG_01415_I2	49-2
SPOG_01861_I3	144-0	SOCG_00642_I3	144-0	SPAC644.18c_I3	144-0	SJAG_01415_I3	144-0
SPOG_04537_I1	34-2	SOCG_01538_I1	34-2	SPAC664.02c_I1	34-2	SJAG_01611_I1	34-2
SPOG_04531_I3	54-2	SOCG_01544_I3	54-2	SPAC664.08c_I3	75-2	SJAG_01604_I3	53-2
SPOG_03899_I1	42-2	SOCG_01634_I1	42-2	SPAC688.09_I1	56-2	SJAG_00154_I1	25-2
SPOG_02574_I1	20-1	SOCG_02972_I1	19-1	SPAC694.04c_I1	19-1	SJAG_01501_I1	42-1
SPOG_02573_I2	82-1	SOCG_02971_I2	82-1	SPAC694.05c_I2	91-1	SJAG_04672_I2	82-1
SPOG_00297_I1	30-2	SOCG_04242_I1	30-2	SPAC6B12.08_I1	30-2	SJAG_04991_I1	26-2
SPOG_00301_I1	44-1	SOCG_04238_I1	44-1	SPAC6B12.11_I1	44-1	SJAG_04995_I1	45-1
SPOG_00301_I2	272-1	SOCG_04238_I2	274-1	SPAC6B12.11_I2	255-1	SJAG_04995_I2	274-1
SPOG_00305_I1	42-0	SOCG_04234_I1	42-0	SPAC6B12.15_I1	42-0	SJAG_05000_I1	42-0
SPOG_00305_I2	175-0	SOCG_04234_I2	175-0	SPAC6B12.15_I2	175-0	SJAG_05000_I2	175-0
SPOG_00553_I1	17-1	SOCG_02271_I1	17-1	SPAC6F12.07_I1	17-1	SJAG_03358_I1	17-1
SPOG_00553_I2	37-1	SOCG_02271_I2	37-1	SPAC6F12.07_I2	37-1	SJAG_03358_I2	37-1
SPOG_00549_I1	39-0	SOCG_02275_I1	39-0	SPAC6F12.11c_I1	38-0	SJAG_03354_I1	38-0
SPOG_00547_I2	44-0	SOCG_02277_I2	44-0	SPAC6F12.13c_I1	40-0	SJAG_03352_I2	47-0
SPOG_00546_I1	38-2	SOCG_02278_I1	38-2	SPAC6F12.14_I1	45-2	SJAG_03351_I1	38-2
SPOG_00546_I2	278-1	SOCG_02278_I2	278-1	SPAC6F12.14_I2	285-1	SJAG_03351_I2	279-1
SPOG_00545_I1	530-2	SOCG_02279_I1	531-2	SPAC6F12.15c_I1	530-2	SJAG_03350_I1	533-2
SPOG_00545_I2	575-0	SOCG_02279_I2	576-0	SPAC6F12.15c_I2	575-0	SJAG_03350_I2	578-0
SPOG_03734_I1	264-0	SOCG_04523_I1	264-0	SPAC6F6.03c_I1	265-0	SJAG_01391_I1	264-0
SPOG_03739_I1	167-0	SOCG_04518_I1	167-0	SPAC6F6.08c_I1	167-0	SJAG_01386_I1	167-0
SPOG_03739_I2	198-1	SOCG_04518_I2	198-1	SPAC6F6.08c_I2	198-1	SJAG_01386_I2	198-1
SPOG_03739_I3	247-2	SOCG_04518_I3	247-2	SPAC6F6.08c_I3	247-2	SJAG_01386_I3	247-2
SPOG_03741_I1	21-2	SOCG_04516_I1	21-2	SPAC6F6.10c_I1	21-2	SJAG_01384_I1	21-2
SPOG_03742_I1	13-0	SOCG_04515_I1	13-0	SPAC6F6.11c_I1	11-0	SJAG_01383_I1	10-0
SPOG_03742_I2	50-1	SOCG_04515_I2	50-1	SPAC6F6.11c_I2	48-1	SJAG_01383_I2	47-1
SPOG_03743_I1	44-0	SOCG_04514_I1	44-0	SPAC6F6.12_I1	44-0	SJAG_01382_I1	38-0
SPOG_03743_I2	90-1	SOCG_04514_I2	90-1	SPAC6F6.12_I2	90-1	SJAG_01382_I2	84-1
SPOG_03746_I1	27-0	SOCG_04511_I1	27-0	SPAC6F6.15_I1	27-0	SJAG_01379_I1	25-0
SPOG_03746_I2	41-1	SOCG_04511_I2	41-1	SPAC6F6.15_I2	41-1	SJAG_01379_I2	39-1
SPOG_03746_I3	49-1	SOCG_04511_I3	49-1	SPAC6F6.15_I3	49-1	SJAG_01379_I3	47-1
SPOG_03746_I4	69-2	SOCG_04511_I4	69-2	SPAC6F6.15_I4	69-2	SJAG_01379_I4	67-2
SPOG_03746_I5	85-1	SOCG_04511_I5	85-1	SPAC6F6.15_I5	85-1	SJAG_01379_I5	83-1
SPOG_03746_I6	100-0	SOCG_04511_I6	100-0	SPAC6F6.15_I6	100-0	SJAG_01379_I6	98-0
SPOG_04832_I1	7-1	SOCG_04885_I1	7-1	SPAC6G10.04c_I1	7-1	SJAG_04355_I1	7-1
SPOG_04832_I2	50-0	SOCG_04885_I2	50-0	SPAC6G10.04c_I2	50-0	SJAG_04355_I2	50-0
SPOG_04832_I3	85-2	SOCG_04885_I3	85-2	SPAC6G10.04c_I3	85-2	SJAG_04355_I3	85-2
SPOG_04827_I1	80-1	SOCG_04880_I1	80-1	SPAC6G10.09_I1	80-1	SJAG_06399_I1	79-1
SPOG_04823_I1	60-1	SOCG_04876_I1	60-1	SPAC6G9.01c_I1	61-1	SJAG_02251_I1	63-1
SPOG_04817_I1	1-0	SOCG_04870_I1	1-0	SPAC6G9.07c_I1	1-0	SJAG_02245_I1	1-0
SPOG_04817_I2	69-2	SOCG_04870_I2	69-2	SPAC6G9.07c_I2	69-2	SJAG_02245_I2	69-2
SPOG_04817_I3	110-0	SOCG_04870_I3	110-0	SPAC6G9.07c_I3	110-0	SJAG_02245_I3	110-0
SPOG_00111_I1	31-0	SOCG_04678_I1	31-0	SPAC767.01c_I1	31-0	SJAG_02384_I1	96-0
SPOG_01753_I5	443-2	SOCG_00744_I5	442-2	SPAC7D4.10_I5	443-2	SJAG_04955_I5	441-2
SPOG_01997_I1	2-1	SOCG_00508_I1	2-1	SPAC806.02c_I1	2-1	SJAG_02895_I1	2-1
SPOG_00691_I1	15-1	SOCG_02135_I1	14-1	SPAC821.06_I1	14-1	SJAG_00663_I1	14-1
SPOG_00691_I2	40-1	SOCG_02135_I2	39-1	SPAC821.06_I2	39-1	SJAG_00663_I2	39-1
SPOG_00691_I3	83-1	SOCG_02135_I3	82-1	SPAC821.06_I3	82-1	SJAG_00663_I3	82-1
SPOG_00691_I4	110-2	SOCG_02135_I4	109-2	SPAC821.06_I4	109-2	SJAG_00663_I4	109-2
SPOG_01746_I1	15-1	SOCG_00751_I1	15-1	SPAC823.14_I1	15-1	SJAG_04964_I1	16-1
SPOG_01746_I2	28-1	SOCG_00751_I2	28-1	SPAC823.14_I2	28-1	SJAG_04964_I2	29-1
SPOG_01746_I3	52-2	SOCG_00751_I3	52-2	SPAC823.14_I3	52-2	SJAG_04964_I3	53-2
SPOG_01748_I1	15-2	SOCG_00749_I1	15-2	SPAC823.16c_I1	15-2	SJAG_04963_I1	15-2
SPOG_01748_I2	40-1	SOCG_00749_I2	40-1	SPAC823.16c_I2	40-1	SJAG_04963_I2	40-1
SPOG_01570_I4	86-0	SOCG_02431_I4	86-0	SPAC824.05_I4	86-0	SJAG_01598_I4	84-0
SPOG_01571_I2	17-0	SOCG_02430_I2	17-0	SPAC824.06_I2	17-0	SJAG_01597_I2	18-0
SPOG_01572_I1	40-2	SOCG_02429_I1	40-2	SPAC824.07_I1	40-2	SJAG_01596_I1	41-2
SPOG_01918_I2	40-1	SOCG_00587_I2	40-1	SPAC890.03_I2	40-1	SJAG_02760_I2	41-1
SPOG_01918_I3	56-0	SOCG_00587_I3	56-0	SPAC890.03_I3	56-0	SJAG_02760_I3	57-0
SPOG_01919_I1	73-1	SOCG_00586_I1	51-1	SPAC890.04c_I1	51-1	SJAG_02759_I1	51-1
SPOG_01921_I1	45-1	SOCG_00584_I1	45-1	SPAC890.06_I1	45-1	SJAG_02757_I1	43-1
SPOG_01921_I2	80-1	SOCG_00584_I2	80-1	SPAC890.06_I2	80-1	SJAG_02757_I2	78-1
SPOG_01922_I4	60-0	SOCG_00583_I4	60-0	SPAC890.07c_I4	60-0	SJAG_02756_I3	87-0
SPOG_01922_I5	82-0	SOCG_00583_I5	82-0	SPAC890.07c_I5	82-0	SJAG_02756_I4	109-0
SPOG_01922_I6	181-1	SOCG_00583_I6	181-1	SPAC890.07c_I6	181-1	SJAG_02756_I5	208-1
SPOG_01922_I7	292-0	SOCG_00583_I7	292-0	SPAC890.07c_I7	292-0	SJAG_02756_I6	319-0
SPOG_01922_I8	339-2	SOCG_00583_I8	339-2	SPAC890.07c_I8	339-2	SJAG_02756_I7	366-2
SPOG_01923_I1	49-0	SOCG_00582_I1	49-0	SPAC890.08_I1	49-0	SJAG_02755_I1	58-0
SPOG_04717_I1	5-0	SOCG_03173_I1	5-0	SPAC8C9.10c_I1	5-0	SJAG_02475_I1	5-0
SPOG_04717_I2	33-0	SOCG_03173_I2	33-0	SPAC8C9.10c_I2	33-0	SJAG_02475_I2	33-0
SPOG_04718_I1	20-0	SOCG_03172_I1	20-0	SPAC8C9.11_I1	20-0	SJAG_02474_I1	20-0
SPOG_04718_I2	70-0	SOCG_03172_I2	70-0	SPAC8C9.11_I2	70-0	SJAG_02474_I2	70-0
SPOG_04721_I1	10-0	SOCG_03169_I1	10-0	SPAC8C9.14_I1	10-0	SJAG_02472_I1	10-0
SPOG_04721_I3	67-2	SOCG_03169_I3	67-2	SPAC8C9.14_I3	67-2	SJAG_02472_I4	95-2
SPOG_04721_I4	86-0	SOCG_03169_I4	86-0	SPAC8C9.14_I4	86-0	SJAG_02472_I5	114-0
SPOG_04722_I1	32-1	SOCG_03168_I1	21-1	SPAC8C9.15c_I1	20-1	SJAG_02471_I1	21-1
SPOG_04722_I2	52-0	SOCG_03168_I2	41-0	SPAC8C9.15c_I2	40-0	SJAG_02471_I2	41-0
SPOG_04722_I3	94-2	SOCG_03168_I3	83-2	SPAC8C9.15c_I3	82-2	SJAG_02471_I3	83-2
SPOG_00492_I1	24-1	SOCG_04819_I1	24-1	SPAC8E11.02c_I1	24-1	SJAG_02266_I1	24-1
SPOG_00491_I1	28-1	SOCG_04820_I1	28-1	SPAC8E11.03c_I1	25-1	SJAG_02267_I1	29-1
SPOG_00490_I1	25-1	SOCG_04821_I1	25-1	SPAC8E11.04c_I1	25-1	SJAG_02268_I1	25-1
SPOG_00490_I2	53-2	SOCG_04821_I2	53-2	SPAC8E11.04c_I2	53-2	SJAG_02268_I2	53-2
SPOG_00490_I3	69-2	SOCG_04821_I3	69-2	SPAC8E11.04c_I3	69-2	SJAG_02268_I3	69-2
SPOG_00490_I4	118-1	SOCG_04821_I4	118-1	SPAC8E11.04c_I4	118-1	SJAG_02268_I4	118-1
SPOG_03788_I1	15-1	SOCG_01742_I1	38-1	SPAC8F11.02c_I1	15-1	SJAG_01418_I1	15-1
SPOG_03788_I2	35-0	SOCG_01742_I2	58-0	SPAC8F11.02c_I2	35-0	SJAG_01418_I2	35-0
SPOG_03791_I1	109-2	SOCG_01739_I1	109-2	SPAC8F11.05c_I1	108-2	SJAG_01421_I1	112-2
SPOG_03795_I1	38-2	SOCG_01735_I1	38-2	SPAC8F11.09c_I1	38-2	SJAG_01425_I1	40-2
SPOG_04944_I1	33-0	SOCG_02332_I1	33-0	SPAC9.02c_I1	33-0	SJAG_02296_I1	33-0
SPOG_04940_I1	55-1	SOCG_02336_I1	55-1	SPAC9.07c_I1	54-1	SJAG_02292_I1	54-1
SPOG_02699_I1	49-0	SOCG_03094_I1	49-0	SPAC926.02_I1	48-0	SJAG_01666_I1	53-0
SPOG_00494_I1	11-0	SOCG_04817_I1	11-0	SPAC959.02_I1	11-0	SJAG_04909_I1	11-0
SPOG_00494_I2	51-1	SOCG_04817_I2	51-1	SPAC959.02_I2	51-1	SJAG_04909_I2	52-1
SPOG_00494_I3	152-2	SOCG_04817_I3	152-2	SPAC959.02_I3	152-2	SJAG_04909_I3	153-2
SPOG_00340_I1	40-0	SOCG_04202_I1	23-0	SPAC9E9.06c_I1	23-0	SJAG_00432_I1	23-0
SPOG_00334_I1	9-1	SOCG_04207_I1	9-1	SPAC9E9.13_I1	10-1	SJAG_03784_I1	9-1
SPOG_02151_I1	80-2	SOCG_00354_I1	80-2	SPAC9G1.03c_I1	80-2	SJAG_03383_I1	80-2
SPOG_00100_I2	266-0	SOCG_04688_I2	266-0	SPAC9G1.04_I2	260-0	SJAG_05300_I1	265-0
SPOG_00101_I2	77-1	SOCG_04687_I2	77-1	SPAC9G1.05_I2	77-1	SJAG_03380_I2	77-1
SPOG_00101_I3	111-1	SOCG_04687_I3	111-1	SPAC9G1.05_I3	111-1	SJAG_03380_I3	111-1
SPOG_00101_I4	126-2	SOCG_04687_I4	126-2	SPAC9G1.05_I4	126-2	SJAG_03380_I4	126-2
SPOG_00101_I5	141-0	SOCG_04687_I5	141-0	SPAC9G1.05_I5	141-0	SJAG_03380_I5	141-0
SPOG_00101_I6	454-0	SOCG_04687_I6	454-0	SPAC9G1.05_I6	455-0	SJAG_03380_I6	457-0
SPOG_00102_I1	23-1	SOCG_04686_I1	23-1	SPAC9G1.06c_I1	23-1	SJAG_03379_I1	23-1
SPOG_00106_I1	39-0	SOCG_04683_I1	39-0	SPAC9G1.09_I1	39-0	SJAG_03376_I1	46-0
SPOG_00110_I1	69-2	SOCG_04679_I1	69-2	SPAC9G1.13c_I1	69-2	SJAG_02385_I1	69-2
SPOG_00110_I3	125-1	SOCG_04679_I3	125-1	SPAC9G1.13c_I3	125-1	SJAG_02385_I3	124-1
SPOG_02134_I1	8-0	SOCG_00371_I1	8-0	SPAP14E8.03_I1	30-0	SJAG_04513_I1	8-0
SPOG_02134_I2	41-1	SOCG_00371_I2	41-1	SPAP14E8.03_I2	63-1	SJAG_04513_I2	41-1
SPOG_04883_I1	236-1	SOCG_02394_I1	243-1	SPAP27G11.03_I1	224-1	SJAG_00353_I1	223-1
SPOG_04881_I1	54-0	SOCG_02396_I1	54-0	SPAP27G11.05c_I1	54-0	SJAG_00380_I1	54-0
SPOG_04881_I2	102-1	SOCG_02396_I2	102-1	SPAP27G11.05c_I2	102-1	SJAG_00380_I2	102-1
SPOG_04881_I3	155-1	SOCG_02396_I3	155-1	SPAP27G11.05c_I3	155-1	SJAG_00380_I3	155-1
SPOG_04880_I1	55-1	SOCG_02397_I1	55-1	SPAP27G11.06c_I1	55-1	SJAG_00379_I1	55-1
SPOG_04880_I2	98-0	SOCG_02397_I2	98-0	SPAP27G11.06c_I2	98-0	SJAG_00379_I2	98-0
SPOG_04879_I1	203-0	SOCG_02398_I1	212-0	SPAP27G11.07c_I1	202-0	SJAG_00378_I1	203-0
SPOG_03720_I1	11-1	SOCG_04537_I1	11-1	SPAP8A3.08_I1	11-1	SJAG_00228_I1	11-1
SPOG_03720_I2	55-1	SOCG_04537_I2	55-1	SPAP8A3.08_I2	55-1	SJAG_00228_I2	55-1
SPOG_03720_I3	102-1	SOCG_04537_I3	102-1	SPAP8A3.08_I3	102-1	SJAG_00228_I3	102-1
SPOG_03720_I4	133-1	SOCG_04537_I4	133-1	SPAP8A3.08_I4	133-1	SJAG_00228_I4	133-1
SPOG_03719_I1	5-0	SOCG_04538_I1	5-0	SPAP8A3.09c_I1	5-0	SJAG_00229_I1	5-0
SPOG_03719_I2	21-0	SOCG_04538_I2	21-0	SPAP8A3.09c_I2	21-0	SJAG_00229_I2	21-0
SPOG_03719_I3	57-1	SOCG_04538_I3	57-1	SPAP8A3.09c_I3	57-1	SJAG_00229_I3	57-1
SPOG_03719_I4	358-2	SOCG_04538_I4	358-2	SPAP8A3.09c_I4	358-2	SJAG_00229_I4	358-2
SPOG_03719_I5	392-1	SOCG_04538_I5	392-1	SPAP8A3.09c_I5	392-1	SJAG_00229_I5	392-1
SPOG_03719_I6	504-0	SOCG_04538_I6	504-0	SPAP8A3.09c_I6	504-0	SJAG_00229_I6	504-0
SPOG_03718_I1	27-2	SOCG_04539_I1	27-2	SPAP8A3.10_I1	28-2	SJAG_00230_I1	27-2
SPOG_00579_I1	28-0	SOCG_02246_I1	28-0	SPAPB17E12.03_I1	28-0	SJAG_03324_I1	30-0
SPOG_00578_I1	8-2	SOCG_02247_I1	8-2	SPAPB17E12.04c_I1	8-2	SJAG_03325_I1	9-2
SPOG_00578_I3	67-2	SOCG_02247_I3	67-2	SPAPB17E12.04c_I3	67-2	SJAG_03325_I3	68-2
SPOG_00578_I4	87-0	SOCG_02247_I4	87-0	SPAPB17E12.04c_I4	87-0	SJAG_03325_I4	88-0
SPOG_00575_I1	284-1	SOCG_02250_I1	285-1	SPAPB17E12.07c_I1	279-1	SJAG_03328_I2	237-1
SPOG_00574_I1	69-0	SOCG_02251_I1	69-0	SPAPB17E12.08_I1	69-0	SJAG_03330_I1	69-0
SPOG_00574_I2	86-2	SOCG_02251_I2	86-2	SPAPB17E12.08_I2	86-2	SJAG_03330_I2	86-2
SPOG_00572_I2	82-0	SOCG_02253_I2	82-0	SPAPB17E12.10c_I2	82-0	SJAG_03332_I2	66-0
SPOG_00571_I2	119-0	SOCG_02254_I2	108-0	SPAPB17E12.11_I2	108-0	SJAG_03333_I2	107-0
SPOG_02117_I1	137-1	SOCG_00387_I1	137-1	SPAPB1A10.09_I1	142-1	SJAG_03073_I1	134-1
SPOG_02123_I1	29-0	SOCG_00381_I1	29-0	SPAPB1A10.15_I1	29-0	SJAG_00261_I1	29-0
SPOG_02123_I2	74-0	SOCG_00381_I2	74-0	SPAPB1A10.15_I2	74-0	SJAG_00261_I2	74-0
SPOG_04805_I1	64-0	SOCG_04858_I1	64-0	SPAPB1E7.02c_I1	64-0	SJAG_00618_I1	65-0
SPOG_04804_I1	22-0	SOCG_04857_I1	22-0	SPAPB1E7.03_I1	22-0	SJAG_00619_I1	22-0
SPOG_00465_I1	14-1	SOCG_04846_I1	14-1	SPAPB1E7.14_I1	14-1	SJAG_03033_I1	17-1
SPOG_00465_I2	103-1	SOCG_04846_I2	103-1	SPAPB1E7.14_I2	101-1	SJAG_03033_I2	99-1
SPOG_01539_I2	42-0	SOCG_02462_I2	45-0	SPAPB21F2.02_I2	45-0	SJAG_06386_I2	45-0
SPOG_03729_I1	49-0	SOCG_04528_I1	49-0	SPAPB2B4.05_I1	49-0	SJAG_01397_I1	49-0
SPOG_03729_I4	163-2	SOCG_04528_I4	163-2	SPAPB2B4.05_I4	163-2	SJAG_01397_I4	163-2
SPOG_03729_I6	250-2	SOCG_04528_I6	250-2	SPAPB2B4.05_I5	250-2	SJAG_01397_I6	250-2
SPOG_03729_I7	327-0	SOCG_04528_I7	327-0	SPAPB2B4.05_I6	327-0	SJAG_01397_I7	327-0
SPOG_01878_I1	48-0	SOCG_00625_I1	48-0	SPAPB8E5.09_I1	48-0	SJAG_06393_I1	48-0
SPOG_00969_I2	43-1	SOCG_01052_I2	43-1	SPAPJ691.03_I2	43-1	SJAG_02002_I2	51-1
SPOG_03988_I1	13-1	SOCG_02023_I1	13-1	SPAPJ696.02_I1	13-1	SJAG_00970_I1	13-1
SPOG_03988_I2	26-0	SOCG_02023_I2	26-0	SPAPJ696.02_I2	26-0	SJAG_00970_I2	26-0
SPOG_00944_I1	50-1	SOCG_01077_I1	50-1	SPAPJ760.02c_I1	50-1	SJAG_02566_I1	50-1
SPOG_01087_I2	628-2	SOCG_00939_I2	627-2	SPAPYUG7.02c_I2	636-2	SJAG_00117_I5	602-2
SPOG_01089_I1	14-2	SOCG_00937_I1	14-2	SPAPYUG7.04c_I1	14-2	SJAG_00119_I1	14-2
SPOG_01089_I2	36-0	SOCG_00937_I2	36-0	SPAPYUG7.04c_I2	36-0	SJAG_00119_I2	36-0
SPOG_01089_I3	53-2	SOCG_00937_I3	53-2	SPAPYUG7.04c_I3	53-2	SJAG_00119_I3	53-2
SPOG_01089_I4	97-0	SOCG_00937_I4	97-0	SPAPYUG7.04c_I4	97-0	SJAG_00119_I4	97-0
SPOG_02258_I1	40-1	SOCG_02663_I1	40-1	SPBC106.15_I1	42-1	SJAG_04306_I1	40-1
SPOG_02258_I2	153-1	SOCG_02663_I2	153-1	SPBC106.15_I2	155-1	SJAG_04306_I2	153-1
SPOG_02260_I1	33-0	SOCG_02665_I1	33-0	SPBC106.16_I1	33-0	SJAG_16189_I1	33-0
SPOG_02260_I2	158-2	SOCG_02665_I2	158-2	SPBC106.16_I2	158-2	SJAG_16189_I2	158-2
SPOG_03002_I1	66-1	SOCG_01263_I1	66-1	SPBC1105.08_I1	67-1	SJAG_00299_I2	71-1
SPOG_03001_I1	23-0	SOCG_01262_I2	63-0	SPBC1105.09_I2	63-0	SJAG_00300_I2	62-0
SPOG_03001_I2	33-0	SOCG_01262_I3	73-0	SPBC1105.09_I3	73-0	SJAG_00300_I3	72-0
SPOG_01322_I1	19-1	SOCG_04450_I1	19-1	SPBC115.01c_I1	19-1	SJAG_06343_I1	19-1
SPOG_01342_I1	29-2	SOCG_04429_I1	29-2	SPBC119.07_I1	29-2	SJAG_04552_I1	91-2
SPOG_01343_I1	22-0	SOCG_04428_I1	22-0	SPBC119.08_I1	22-0	SJAG_04551_I1	22-0
SPOG_01350_I2	112-0	SOCG_04421_I2	112-0	SPBC119.14_I2	105-0	SJAG_04530_I1	114-0
SPOG_01350_I4	264-1	SOCG_04421_I4	263-1	SPBC119.14_I4	250-1	SJAG_04530_I4	285-1
SPOG_01351_I1	23-1	SOCG_04420_I1	23-1	SPBC119.15_I1	20-1	SJAG_04531_I1	20-1
SPOG_01351_I2	74-2	SOCG_04420_I2	74-2	SPBC119.15_I2	71-2	SJAG_04531_I2	71-2
SPOG_01462_I1	62-2	SOCG_02540_I1	62-2	SPBC1198.10c_I1	63-2	SJAG_04856_I1	57-2
SPOG_01463_I1	328-2	SOCG_02539_I1	328-2	SPBC1198.11c_I1	326-2	SJAG_04855_I1	329-2
SPOG_01466_I1	176-0	SOCG_02536_I1	176-0	SPBC1198.13c_I1	204-0	SJAG_04852_I1	172-0
SPOG_01466_I2	224-0	SOCG_02536_I2	224-0	SPBC1198.13c_I2	252-0	SJAG_04852_I2	220-0
SPOG_04428_I1	27-1	SOCG_00049_I1	26-1	SPBC11B10.01_I1	29-1	SJAG_03056_I1	31-1
SPOG_04428_I2	66-1	SOCG_00049_I2	65-1	SPBC11B10.01_I2	68-1	SJAG_03056_I2	70-1
SPOG_04429_I1	23-2	SOCG_00048_I1	23-2	SPBC11B10.02c_I1	23-2	SJAG_03055_I1	45-2
SPOG_04429_I2	27-2	SOCG_00048_I2	27-2	SPBC11B10.02c_I2	27-2	SJAG_03055_I2	49-2
SPOG_04436_I1	13-1	SOCG_00041_I1	13-1	SPBC11B10.09_I1	13-1	SJAG_03048_I1	13-1
SPOG_04436_I2	69-2	SOCG_00041_I2	69-2	SPBC11B10.09_I2	69-2	SJAG_03048_I2	69-2
SPOG_04436_I3	169-0	SOCG_00041_I3	169-0	SPBC11B10.09_I3	169-0	SJAG_03048_I3	169-0
SPOG_04436_I4	271-0	SOCG_00041_I4	271-0	SPBC11B10.09_I4	271-0	SJAG_03048_I4	271-0
SPOG_00801_I1	23-0	SOCG_00095_I1	23-0	SPBC11C11.02_I1	23-0	SJAG_06319_I1	23-0
SPOG_00801_I2	54-2	SOCG_00095_I2	54-2	SPBC11C11.02_I2	54-2	SJAG_06319_I2	54-2
SPOG_00802_I1	10-1	SOCG_00094_I1	10-1	SPBC11C11.03_I1	10-1	SJAG_04075_I1	10-1
SPOG_00802_I2	74-2	SOCG_00094_I2	74-2	SPBC11C11.03_I2	71-2	SJAG_04075_I2	74-2
SPOG_00807_I1	29-2	SOCG_00089_I1	29-2	SPBC11C11.08_I1	29-2	SJAG_04071_I1	29-2
SPOG_00807_I2	48-2	SOCG_00089_I2	48-2	SPBC11C11.08_I2	48-2	SJAG_04071_I2	48-2
SPOG_01203_I1	22-1	SOCG_01844_I1	22-1	SPBC11C11.10_I1	69-1	SJAG_16217_I1	22-1
SPOG_01204_I3	206-2	SOCG_01843_I3	206-2	SPBC11C11.11c_I3	202-2	SJAG_16218_I3	192-2
SPOG_01204_I4	216-2	SOCG_01843_I4	216-2	SPBC11C11.11c_I4	212-2	SJAG_16218_I4	202-2
SPOG_01204_I5	267-1	SOCG_01843_I5	267-1	SPBC11C11.11c_I5	263-1	SJAG_16218_I5	253-1
SPOG_04677_I1	50-1	SOCG_03215_I1	50-1	SPBC11G11.02c_I1	50-1	SJAG_03465_I1	50-1
SPOG_04677_I2	75-0	SOCG_03215_I2	75-0	SPBC11G11.02c_I2	75-0	SJAG_03465_I2	75-0
SPOG_04676_I1	39-0	SOCG_03216_I1	39-0	SPBC11G11.03_I1	39-0	SJAG_03466_I1	39-0
SPOG_04675_I1	31-0	SOCG_03217_I1	31-0	SPBC11G11.04_I1	29-0	SJAG_03467_I1	29-0
SPOG_04439_I1	11-0	SOCG_00038_I1	11-0	SPBC1215.02c_I1	11-0	SJAG_03045_I1	11-0
SPOG_04439_I2	58-1	SOCG_00038_I2	58-1	SPBC1215.02c_I2	58-1	SJAG_03045_I2	58-1
SPOG_04439_I3	97-0	SOCG_00038_I3	97-0	SPBC1215.02c_I3	97-0	SJAG_03045_I3	97-0
SPOG_03680_I1	34-1	SOCG_04579_I1	34-1	SPBC1271.02_I1	34-1	SJAG_16211_I1	47-1
SPOG_03674_I2	22-1	SOCG_04585_I2	22-1	SPBC1271.11_I2	22-1	SJAG_01589_I2	25-1
SPOG_03674_I3	24-0	SOCG_04585_I3	24-0	SPBC1271.11_I3	24-0	SJAG_01589_I3	27-0
SPOG_03674_I4	65-1	SOCG_04585_I4	65-1	SPBC1271.11_I4	65-1	SJAG_01589_I4	68-1
SPOG_03673_I1	50-2	SOCG_04586_I1	25-2	SPBC1271.12_I1	24-2	SJAG_01590_I1	23-2
SPOG_03673_I2	54-0	SOCG_04586_I2	29-0	SPBC1271.12_I2	28-0	SJAG_01590_I2	27-0
SPOG_03673_I3	63-2	SOCG_04586_I3	38-2	SPBC1271.12_I3	37-2	SJAG_01590_I3	36-2
SPOG_03673_I4	89-0	SOCG_04586_I4	64-0	SPBC1271.12_I4	63-0	SJAG_01590_I4	62-0
SPOG_03673_I5	130-0	SOCG_04586_I5	105-0	SPBC1271.12_I5	104-0	SJAG_01590_I5	103-0
SPOG_03672_I1	25-2	SOCG_04587_I1	25-2	SPBC1271.13_I1	25-2	SJAG_01591_I1	25-2
SPOG_00920_I1	41-0	SOCG_01098_I1	41-0	SPBC1289.03c_I1	42-0	SJAG_01449_I1	41-0
SPOG_00919_I1	44-0	SOCG_01099_I1	44-0	SPBC1289.04c_I1	44-0	SJAG_01448_I1	44-0
SPOG_00918_I1	1-0	SOCG_01100_I1	1-0	SPBC1289.05c_I1	1-0	SJAG_01447_I1	1-0
SPOG_00918_I2	14-0	SOCG_01100_I2	14-0	SPBC1289.05c_I2	14-0	SJAG_01447_I2	14-0
SPOG_00918_I3	29-1	SOCG_01100_I3	29-1	SPBC1289.05c_I3	29-1	SJAG_01447_I3	29-1
SPOG_00918_I4	62-0	SOCG_01100_I4	62-0	SPBC1289.05c_I4	62-0	SJAG_01447_I4	62-0
SPOG_02152_I1	47-1	SOCG_00353_I1	47-1	SPBC12C2.08_I1	47-1	SJAG_02848_I1	47-1
SPOG_02155_I1	2-2	SOCG_00350_I1	2-2	SPBC12C2.11_I1	2-2	SJAG_04728_I1	2-2
SPOG_02155_I2	26-1	SOCG_00350_I2	26-1	SPBC12C2.11_I2	26-1	SJAG_04728_I2	26-1
SPOG_04131_I1	11-1	SOCG_03605_I1	11-1	SPBC12D12.03_I1	11-1	SJAG_00609_I1	13-1
SPOG_04131_I2	27-1	SOCG_03605_I2	27-1	SPBC12D12.03_I2	27-1	SJAG_00609_I2	29-1
SPOG_04131_I3	55-0	SOCG_03605_I3	55-0	SPBC12D12.03_I3	55-0	SJAG_00609_I3	57-0
SPOG_04297_I1	352-2	SOCG_03443_I1	350-2	SPBC1306.02_I1	349-2	SJAG_02352_I1	353-2
SPOG_04592_I1	20-1	SOCG_01485_I1	20-1	SPBC1347.03_I1	28-1	SJAG_00405_I1	20-1
SPOG_04590_I2	57-2	SOCG_01487_I2	57-2	SPBC1347.05c_I2	57-2	SJAG_00403_I2	54-2
SPOG_04590_I3	384-1	SOCG_01487_I3	381-1	SPBC1347.05c_I3	383-1	SJAG_00403_I3	384-1
SPOG_04589_I1	42-0	SOCG_01488_I1	42-0	SPBC1347.06c_I1	42-0	SJAG_00402_I1	40-0
SPOG_01217_I1	70-0	SOCG_01831_I1	70-0	SPBC13A2.01c_I1	70-0	SJAG_01064_I1	70-0
SPOG_01219_I1	113-2	SOCG_01829_I1	154-2	SPBC13A2.03_I1	113-2	SJAG_00426_I1	118-2
SPOG_01219_I2	160-1	SOCG_01829_I2	201-1	SPBC13A2.03_I2	160-1	SJAG_00426_I2	165-1
SPOG_02811_I1	748-0	SOCG_00226_I1	747-0	SPBC13E7.05_I1	738-0	SJAG_03115_I1	704-0
SPOG_02806_I1	22-2	SOCG_00221_I1	22-2	SPBC13E7.10c_I1	22-2	SJAG_03120_I1	22-2
SPOG_03078_I1	12-0	SOCG_01336_I1	12-0	SPBC13G1.01c_I1	12-0	SJAG_00889_I1	12-0
SPOG_03079_I1	14-2	SOCG_01337_I1	14-2	SPBC13G1.02_I1	14-2	SJAG_00890_I1	19-2
SPOG_03079_I2	27-0	SOCG_01337_I2	27-0	SPBC13G1.02_I2	27-0	SJAG_00890_I2	32-0
SPOG_03080_I1	91-0	SOCG_01338_I1	91-0	SPBC13G1.03c_I1	91-0	SJAG_00891_I1	90-0
SPOG_03081_I1	257-1	SOCG_01339_I1	257-1	SPBC13G1.04c_I1	262-1	SJAG_00892_I1	257-1
SPOG_03088_I1	35-2	SOCG_01346_I1	35-2	SPBC13G1.11_I1	35-2	SJAG_00899_I1	35-2
SPOG_03090_I1	6-1	SOCG_01347_I1	6-1	SPBC13G1.12_I1	6-1	SJAG_00900_I1	6-1
SPOG_03090_I2	12-0	SOCG_01347_I2	12-0	SPBC13G1.12_I2	12-0	SJAG_00900_I2	12-0
SPOG_03090_I3	38-0	SOCG_01347_I3	38-0	SPBC13G1.12_I3	38-0	SJAG_00900_I3	38-0
SPOG_03090_I4	87-0	SOCG_01347_I4	87-0	SPBC13G1.12_I4	87-0	SJAG_00900_I4	87-0
SPOG_03090_I5	110-0	SOCG_01347_I5	110-0	SPBC13G1.12_I5	110-0	SJAG_00900_I5	110-0
SPOG_03090_I6	134-0	SOCG_01347_I6	134-0	SPBC13G1.12_I6	134-0	SJAG_00900_I6	134-0
SPOG_03091_I1	108-2	SOCG_01348_I1	108-2	SPBC13G1.13_I1	108-2	SJAG_00901_I1	108-2
SPOG_03077_I1	67-0	SOCG_01335_I1	64-0	SPBC13G1.14c_I1	100-0	SJAG_00888_I1	60-0
SPOG_03077_I2	103-1	SOCG_01335_I2	100-1	SPBC13G1.14c_I2	136-1	SJAG_00888_I2	96-1
SPOG_04212_I2	59-0	SOCG_03526_I2	59-0	SPBC146.01_I1	59-0	SJAG_03981_I2	59-0
SPOG_04217_I1	12-2	SOCG_03522_I1	12-2	SPBC146.05c_I1	12-2	SJAG_06293_I1	12-2
SPOG_01405_I2	70-0	SOCG_02596_I2	55-0	SPBC14C8.04_I2	55-0	SJAG_06635_I2	55-0
SPOG_01405_I3	135-2	SOCG_02596_I3	120-2	SPBC14C8.04_I3	120-2	SJAG_06635_I3	120-2
SPOG_01403_I1	25-1	SOCG_02598_I1	25-1	SPBC14C8.06_I1	25-1	SJAG_02075_I1	24-1
SPOG_01398_I1	24-1	SOCG_02603_I1	24-1	SPBC14C8.12_I1	24-1	SJAG_02070_I1	24-1
SPOG_01398_I2	91-2	SOCG_02603_I2	91-2	SPBC14C8.12_I2	91-2	SJAG_02070_I2	91-2
SPOG_01395_I1	66-0	SOCG_02606_I1	66-0	SPBC14C8.14c_I1	66-0	SJAG_05253_I1	66-0
SPOG_01136_I1	20-0	SOCG_00892_I1	20-0	SPBC14F5.06_I1	19-0	SJAG_03658_I1	20-0
SPOG_01137_I1	25-2	SOCG_00891_I1	25-2	SPBC14F5.07_I1	25-2	SJAG_03657_I1	25-2
SPOG_01137_I2	38-2	SOCG_00891_I2	38-2	SPBC14F5.07_I2	38-2	SJAG_03657_I2	38-2
SPOG_01137_I3	63-1	SOCG_00891_I3	63-1	SPBC14F5.07_I3	63-1	SJAG_03657_I3	63-1
SPOG_01138_I1	80-0	SOCG_00890_I1	80-0	SPBC14F5.08_I1	82-0	SJAG_02849_I1	75-0
SPOG_01141_I1	97-0	SOCG_00887_I1	97-0	SPBC14F5.11c_I1	96-0	SJAG_02852_I1	105-0
SPOG_01841_I1	20-0	SOCG_00656_I1	20-0	SPBC1539.04_I1	20-0	SJAG_01460_I1	20-0
SPOG_01842_I3	210-0	SOCG_00655_I3	208-0	SPBC1539.05_I3	214-0	SJAG_01459_I3	212-0
SPOG_01842_I6	510-0	SOCG_00655_I6	508-0	SPBC1539.05_I6	516-0	SJAG_01459_I6	519-0
SPOG_01845_I1	36-1	SOCG_00652_I1	36-1	SPBC1539.08_I1	36-1	SJAG_01456_I1	32-1
SPOG_01845_I2	137-1	SOCG_00652_I2	137-1	SPBC1539.08_I4	137-1	SJAG_01456_I4	133-1
SPOG_00923_I1	49-2	SOCG_01095_I1	49-2	SPBC1539.10_I1	49-2	SJAG_01454_I1	49-2
SPOG_01391_I1	60-0	SOCG_02610_I1	58-0	SPBC15C4.01c_I1	57-0	SJAG_02065_I1	59-0
SPOG_01391_I2	108-0	SOCG_02610_I2	106-0	SPBC15C4.01c_I2	105-0	SJAG_02065_I2	107-0
SPOG_01390_I1	141-0	SOCG_02611_I1	141-0	SPBC15C4.02_I1	141-0	SJAG_02064_I1	171-0
SPOG_01390_I2	469-2	SOCG_02611_I2	469-2	SPBC15C4.02_I2	469-2	SJAG_02064_I2	499-2
SPOG_01389_I1	23-2	SOCG_02612_I1	23-2	SPBC15C4.03_I1	23-2	SJAG_02063_I1	22-2
SPOG_02817_I2	490-0	SOCG_00232_I2	490-0	SPBC15D4.14_I1	491-0	SJAG_03107_I1	492-0
SPOG_02816_I1	27-1	SOCG_00231_I1	27-1	SPBC15D4.15_I1	27-1	SJAG_03108_I1	27-1
SPOG_03164_I1	28-2	SOCG_01421_I1	28-2	SPBC1604.04_I1	31-2	SJAG_00835_I1	24-2
SPOG_03164_I2	258-2	SOCG_01421_I2	258-2	SPBC1604.04_I2	261-2	SJAG_00835_I2	256-2
SPOG_03170_I1	72-0	SOCG_01427_I1	72-0	SPBC1677.02_I1	72-0	SJAG_00831_I1	72-0
SPOG_01270_I2	117-2	SOCG_01777_I2	117-2	SPBC1685.03_I2	113-2	SJAG_03261_I2	115-2
SPOG_01264_I1	21-2	SOCG_01784_I1	21-2	SPBC1685.09_I1	21-2	SJAG_03254_I1	21-2
SPOG_01264_I2	54-0	SOCG_01784_I2	54-0	SPBC1685.09_I2	54-0	SJAG_03254_I2	54-0
SPOG_01263_I1	2-0	SOCG_01785_I1	2-0	SPBC1685.10_I1	2-0	SJAG_02340_I1	2-0
SPOG_01263_I2	33-0	SOCG_01785_I2	33-0	SPBC1685.10_I2	33-0	SJAG_02340_I2	33-0
SPOG_01260_I1	8-2	SOCG_01788_I1	8-2	SPBC1685.14c_I1	8-2	SJAG_02337_I1	8-2
SPOG_01260_I2	39-2	SOCG_01788_I2	39-2	SPBC1685.14c_I2	39-2	SJAG_02337_I2	39-2
SPOG_01259_I1	11-1	SOCG_01789_I1	11-1	SPBC1685.15c_I1	11-1	SJAG_02336_I1	11-1
SPOG_01956_I1	65-1	SOCG_00549_I1	65-1	SPBC16A3.01_I1	103-1	SJAG_04375_I1	70-1
SPOG_01956_I2	124-0	SOCG_00549_I2	124-0	SPBC16A3.01_I2	162-0	SJAG_04375_I2	129-0
SPOG_01951_I1	24-0	SOCG_00555_I1	24-0	SPBC16A3.05c_I1	24-0	SJAG_04377_I1	25-0
SPOG_01951_I2	50-2	SOCG_00555_I2	50-2	SPBC16A3.05c_I2	50-2	SJAG_04377_I2	51-2
SPOG_01947_I1	6-0	SOCG_00558_I1	6-0	SPBC16A3.08c_I1	6-0	SJAG_16176_I1	6-0
SPOG_01946_I3	68-1	SOCG_00559_I2	61-1	SPBC16A3.09c_I3	69-1	SJAG_04383_I2	54-1
SPOG_01946_I4	108-0	SOCG_00559_I3	101-0	SPBC16A3.09c_I4	109-0	SJAG_04383_I3	94-0
SPOG_01022_I2	153-0	SOCG_01003_I2	153-0	SPBC16A3.12c_I2	152-0	SJAG_04790_I2	155-0
SPOG_01022_I3	283-1	SOCG_01003_I3	283-1	SPBC16A3.12c_I3	282-1	SJAG_04790_I3	285-1
SPOG_01822_I1	8-1	SOCG_00675_I1	8-1	SPBC16C6.02c_I1	8-1	SJAG_16302_I1	8-1
SPOG_01822_I2	45-0	SOCG_00675_I2	45-0	SPBC16C6.02c_I2	45-0	SJAG_16302_I2	45-0
SPOG_01826_I1	23-0	SOCG_00671_I1	23-0	SPBC16C6.05_I1	23-0	SJAG_01487_I1	23-0
SPOG_01828_I1	38-0	SOCG_00669_I1	49-0	SPBC16C6.07c_I1	38-0	SJAG_01489_I1	38-0
SPOG_01828_I2	66-1	SOCG_00669_I2	77-1	SPBC16C6.07c_I2	66-1	SJAG_01489_I2	66-1
SPOG_01829_I3	163-1	SOCG_00668_I3	156-1	SPBC16C6.08c_I3	156-1	SJAG_01490_I3	221-1
SPOG_03022_I1	260-1	SOCG_01282_I1	260-1	SPBC16D10.02_I1	264-1	SJAG_04179_I2	228-1
SPOG_03022_I2	315-1	SOCG_01282_I2	315-1	SPBC16D10.02_I2	319-1	SJAG_04179_I3	283-1
SPOG_03022_I3	413-1	SOCG_01282_I3	411-1	SPBC16D10.02_I3	412-1	SJAG_04179_I4	377-1
SPOG_03023_I3	190-2	SOCG_01283_I3	190-2	SPBC16D10.03_I1	194-2	SJAG_04181_I3	193-2
SPOG_03025_I1	123-0	SOCG_01285_I1	123-0	SPBC16D10.05_I1	119-0	SJAG_04184_I1	115-0
SPOG_05419_I3	111-0	SOCG_01287_I3	111-0	SPBC16D10.07c_I3	110-0	SJAG_04186_I2	110-0
SPOG_05419_I4	122-2	SOCG_01287_I4	122-2	SPBC16D10.07c_I4	121-2	SJAG_04186_I3	121-2
SPOG_05419_I5	268-1	SOCG_01287_I5	268-1	SPBC16D10.07c_I5	267-1	SJAG_04186_I4	267-1
SPOG_03030_I1	27-0	SOCG_01289_I1	27-0	SPBC16D10.09_I1	27-0	SJAG_04189_I1	27-0
SPOG_03031_I1	19-0	SOCG_01290_I1	21-0	SPBC16D10.10_I1	21-0	SJAG_16203_I1	19-0
SPOG_03031_I6	327-2	SOCG_01290_I6	329-2	SPBC16D10.10_I6	332-2	SJAG_16203_I4	308-2
SPOG_03032_I1	8-0	SOCG_01291_I1	8-0	SPBC16D10.11c_I1	8-0	SJAG_04188_I1	8-0
SPOG_04113_I2	59-1	SOCG_03624_I2	57-1	SPBC16E9.02c_I2	57-1	SJAG_05335_I1	80-1
SPOG_04107_I2	143-1	SOCG_03630_I2	143-1	SPBC16E9.09c_I2	143-1	SJAG_04598_I2	142-1
SPOG_04107_I3	207-1	SOCG_03630_I3	207-1	SPBC16E9.09c_I3	207-1	SJAG_04598_I3	206-1
SPOG_04108_I1	104-0	SOCG_03629_I1	105-0	SPBC16E9.10c_I1	105-0	SJAG_04599_I1	108-0
SPOG_04109_I1	60-2	SOCG_03628_I1	60-2	SPBC16E9.11c_I1	60-2	SJAG_04600_I1	60-2
SPOG_04110_I1	12-0	SOCG_03627_I1	12-0	SPBC16E9.12c_I1	12-0	SJAG_04601_I1	15-0
SPOG_01046_I1	60-1	SOCG_00979_I1	51-1	SPBC16G5.01_I1	51-1	SJAG_01203_I1	51-1
SPOG_01042_I1	7-0	SOCG_00984_I1	7-0	SPBC16G5.04_I1	7-0	SJAG_03176_I1	7-0
SPOG_01041_I1	64-1	SOCG_00985_I1	64-1	SPBC16G5.05c_I1	64-1	SJAG_03170_I1	64-1
SPOG_01034_I1	27-0	SOCG_00992_I1	27-0	SPBC16G5.12c_I1	27-0	SJAG_04816_I1	27-0
SPOG_01034_I3	153-2	SOCG_00992_I3	153-2	SPBC16G5.12c_I2	153-2	SJAG_04816_I3	153-2
SPOG_01034_I4	317-0	SOCG_00992_I4	317-0	SPBC16G5.12c_I3	317-0	SJAG_04816_I4	317-0
SPOG_01032_I1	13-0	SOCG_00994_I1	13-0	SPBC16G5.14c_I1	12-0	SJAG_04814_I1	11-0
SPOG_01031_I1	171-2	SOCG_00995_I1	171-2	SPBC16G5.15c_I1	171-2	SJAG_04813_I1	170-2
SPOG_01030_I1	30-0	SOCG_00996_I1	30-0	SPBC16G5.16_I1	30-0	SJAG_05343_I1	33-0
SPOG_01030_I2	41-1	SOCG_00996_I2	41-1	SPBC16G5.16_I2	41-1	SJAG_05343_I2	44-1
SPOG_04142_I1	47-0	SOCG_03596_I1	47-0	SPBC16H5.07c_I1	47-0	SJAG_00600_I1	44-0
SPOG_04144_I1	264-0	SOCG_03594_I1	264-0	SPBC16H5.09c_I1	266-0	SJAG_00598_I1	266-0
SPOG_04144_I2	297-0	SOCG_03594_I2	297-0	SPBC16H5.09c_I2	299-0	SJAG_00598_I2	299-0
SPOG_04146_I1	64-1	SOCG_03592_I1	64-1	SPBC16H5.11c_I1	84-1	SJAG_00596_I2	94-1
SPOG_04147_I2	59-1	SOCG_03591_I2	59-1	SPBC16H5.12c_I2	59-1	SJAG_00595_I2	57-1
SPOG_04147_I3	96-2	SOCG_03591_I3	96-2	SPBC16H5.12c_I3	96-2	SJAG_00595_I3	94-2
SPOG_02972_I1	43-0	SOCG_01231_I1	43-0	SPBC1703.03c_I1	43-0	SJAG_01621_I1	43-0
SPOG_02973_I1	26-0	SOCG_01232_I1	26-0	SPBC1703.04_I1	24-0	SJAG_01620_I1	25-0
SPOG_02973_I2	72-0	SOCG_01232_I2	72-0	SPBC1703.04_I2	70-0	SJAG_01620_I2	71-0
SPOG_02973_I3	130-2	SOCG_01232_I3	130-2	SPBC1703.04_I3	128-2	SJAG_01620_I3	129-2
SPOG_02974_I1	22-0	SOCG_01233_I1	22-0	SPBC1703.05_I1	22-0	SJAG_01618_I1	22-0
SPOG_02977_I2	72-1	SOCG_01236_I2	72-1	SPBC1703.08c_I2	71-1	SJAG_01616_I2	71-1
SPOG_02862_I1	5-1	SOCG_00276_I1	5-1	SPBC1703.14c_I1	5-1	SJAG_05193_I1	5-1
SPOG_02861_I1	19-0	SOCG_00275_I1	19-0	SPBC1703.15c_I1	19-0	SJAG_05194_I1	14-0
SPOG_02861_I2	246-1	SOCG_00275_I2	246-1	SPBC1703.15c_I2	246-1	SJAG_05194_I2	242-1
SPOG_02861_I3	337-1	SOCG_00275_I3	337-1	SPBC1703.15c_I3	337-1	SJAG_05194_I3	332-1
SPOG_04256_I2	32-1	SOCG_03482_I2	32-1	SPBC1709.02c_I2	30-1	SJAG_00443_I2	33-1
SPOG_04258_I1	10-0	SOCG_03480_I1	10-0	SPBC1709.04c_I1	10-0	SJAG_03238_I1	11-0
SPOG_04258_I2	32-2	SOCG_03480_I2	32-2	SPBC1709.04c_I2	32-2	SJAG_03238_I2	33-2
SPOG_04258_I3	38-2	SOCG_03480_I3	38-2	SPBC1709.04c_I3	38-2	SJAG_03238_I3	39-2
SPOG_04258_I4	54-1	SOCG_03480_I4	54-1	SPBC1709.04c_I4	54-1	SJAG_03238_I4	55-1
SPOG_04258_I5	76-0	SOCG_03480_I5	76-0	SPBC1709.04c_I5	76-0	SJAG_03238_I5	77-0
SPOG_04260_I1	57-1	SOCG_03478_I1	57-1	SPBC1709.06_I1	57-1	SJAG_03236_I1	43-1
SPOG_04261_I1	14-2	SOCG_03477_I1	14-2	SPBC1709.07_I1	14-2	SJAG_03235_I1	14-2
SPOG_04261_I2	160-0	SOCG_03477_I2	160-0	SPBC1709.07_I2	160-0	SJAG_03235_I2	160-0
SPOG_04266_I1	18-1	SOCG_03472_I1	18-1	SPBC1709.11c_I1	18-1	SJAG_03230_I1	18-1
SPOG_04267_I1	140-2	SOCG_03471_I1	140-2	SPBC1709.12_I1	140-2	SJAG_03229_I1	147-2
SPOG_04267_I3	367-2	SOCG_03471_I3	367-2	SPBC1709.12_I3	367-2	SJAG_03229_I3	374-2
SPOG_04269_I1	111-0	SOCG_03469_I1	111-0	SPBC1709.14_I1	109-0	SJAG_03227_I1	106-0
SPOG_04269_I2	170-0	SOCG_03469_I2	170-0	SPBC1709.14_I2	168-0	SJAG_03227_I2	165-0
SPOG_04269_I3	224-1	SOCG_03469_I3	224-1	SPBC1709.14_I3	222-1	SJAG_03227_I3	219-1
SPOG_04262_I2	71-2	SOCG_03476_I2	71-2	SPBC1709.20_I2	71-2	SJAG_03234_I2	87-2
SPOG_03643_I1	9-1	SOCG_04611_I1	9-1	SPBC1711.03_I1	9-1	SJAG_01127_I1	9-1
SPOG_03643_I2	51-2	SOCG_04611_I2	51-2	SPBC1711.03_I2	51-2	SJAG_01127_I2	51-2
SPOG_03643_I3	143-1	SOCG_04611_I3	143-1	SPBC1711.03_I3	143-1	SJAG_01127_I3	142-1
SPOG_03016_I5	345-0	SOCG_01276_I5	346-0	SPBC1718.02_I5	348-0	SJAG_02652_I4	369-0
SPOG_03016_I6	421-1	SOCG_01276_I6	422-1	SPBC1718.02_I6	424-1	SJAG_02652_I5	445-1
SPOG_03014_I1	16-1	SOCG_01274_I1	16-1	SPBC1718.04_I1	16-1	SJAG_02654_I1	16-1
SPOG_03013_I1	70-2	SOCG_01273_I1	70-2	SPBC1718.05_I1	70-2	SJAG_02655_I1	70-2
SPOG_03013_I2	132-1	SOCG_01273_I2	132-1	SPBC1718.05_I2	132-1	SJAG_02655_I2	132-1
SPOG_03013_I3	173-0	SOCG_01273_I3	173-0	SPBC1718.05_I3	173-0	SJAG_02655_I3	173-0
SPOG_04243_I1	17-0	SOCG_03495_I1	17-0	SPBC1734.05c_I1	17-0	SJAG_00818_I1	17-0
SPOG_04246_I2	68-0	SOCG_03492_I2	68-0	SPBC1734.08_I2	68-0	SJAG_00821_I2	68-0
SPOG_04250_I1	54-0	SOCG_03488_I1	61-0	SPBC1734.12c_I1	53-0	SJAG_00437_I1	45-0
SPOG_04252_I1	30-2	SOCG_03486_I1	30-2	SPBC1734.14c_I1	30-2	SJAG_00439_I1	30-2
SPOG_03664_I1	150-1	SOCG_04595_I1	150-1	SPBC1773.07c_I1	150-1	SJAG_02520_I1	152-1
SPOG_03664_I2	193-1	SOCG_04595_I2	193-1	SPBC1773.07c_I2	193-1	SJAG_02520_I2	195-1
SPOG_03662_I1	17-2	SOCG_04597_I1	17-2	SPBC1773.09c_I1	17-2	SJAG_02518_I1	17-2
SPOG_02782_I1	78-0	SOCG_00197_I1	78-0	SPBC1778.06c_I1	78-0	SJAG_03088_I1	78-0
SPOG_02781_I1	168-1	SOCG_00196_I1	168-1	SPBC1778.07_I1	168-1	SJAG_03087_I1	98-1
SPOG_02780_I1	2-0	SOCG_00195_I1	2-0	SPBC1778.08c_I1	2-0	SJAG_03086_I1	2-0
SPOG_02780_I2	36-1	SOCG_00195_I2	36-1	SPBC1778.08c_I2	36-1	SJAG_03086_I2	36-1
SPOG_02780_I3	128-1	SOCG_00195_I3	128-1	SPBC1778.08c_I3	128-1	SJAG_03086_I3	128-1
SPOG_02778_I1	67-0	SOCG_00193_I1	67-0	SPBC1778.10c_I1	68-0	SJAG_05290_I1	91-0
SPOG_02778_I2	146-0	SOCG_00193_I2	146-0	SPBC1778.10c_I2	147-0	SJAG_05290_I2	170-0
SPOG_02778_I4	240-2	SOCG_00193_I4	240-2	SPBC1778.10c_I4	241-2	SJAG_05290_I4	252-2
SPOG_04395_I1	10-2	SOCG_00080_I1	10-2	SPBC17A3.05c_I1	10-2	SJAG_01160_I1	10-2
SPOG_04395_I2	154-1	SOCG_00080_I2	154-1	SPBC17A3.05c_I2	156-1	SJAG_01160_I2	153-1
SPOG_04397_I1	18-1	SOCG_00078_I1	18-1	SPBC17A3.07_I1	18-1	SJAG_01162_I1	18-1
SPOG_00792_I1	67-0	SOCG_00103_I1	67-0	SPBC17D1.01_I2	146-0	SJAG_04085_I1	64-0
SPOG_00793_I1	53-0	SOCG_00102_I1	53-0	SPBC17D1.02_I1	53-0	SJAG_04083_I1	53-0
SPOG_00793_I2	117-2	SOCG_00102_I2	117-2	SPBC17D1.02_I2	117-2	SJAG_04083_I2	117-2
SPOG_00793_I3	344-0	SOCG_00102_I3	344-0	SPBC17D1.02_I3	343-0	SJAG_04083_I3	346-0
SPOG_00785_I1	8-0	SOCG_00110_I1	8-0	SPBC17D11.02c_I1	8-0	SJAG_05274_I1	8-0
SPOG_00786_I1	69-0	SOCG_00109_I1	69-0	SPBC17D11.03c_I1	70-0	SJAG_02630_I1	63-0
SPOG_00788_I1	13-0	SOCG_00107_I1	13-0	SPBC17D11.05_I1	13-0	SJAG_02628_I1	13-0
SPOG_00789_I1	56-1	SOCG_00106_I1	56-1	SPBC17D11.06_I1	56-1	SJAG_02627_I1	56-1
SPOG_00789_I3	318-0	SOCG_00106_I3	318-0	SPBC17D11.06_I3	318-0	SJAG_02627_I2	320-0
SPOG_00791_I3	241-2	SOCG_00104_I3	241-2	SPBC17D11.08_I3	240-2	SJAG_04086_I3	241-2
SPOG_00091_I1	27-2	SOCG_04696_I1	27-2	SPBC17F3.02_I1	27-2	SJAG_04461_I1	27-2
SPOG_00091_I2	189-0	SOCG_04696_I2	189-0	SPBC17F3.02_I2	189-0	SJAG_04461_I2	189-0
SPOG_01422_I2	170-0	SOCG_02579_I2	169-0	SPBC17G9.02c_I2	168-0	SJAG_01151_I2	173-0
SPOG_04499_I1	24-2	SOCG_01577_I1	24-2	SPBC1861.01c_I1	26-2	SJAG_03217_I1	24-2
SPOG_04505_I1	36-1	SOCG_01571_I1	36-1	SPBC1861.07_I1	36-1	SJAG_03211_I1	36-1
SPOG_04505_I2	52-2	SOCG_01571_I2	52-2	SPBC1861.07_I2	52-2	SJAG_03211_I2	52-2
SPOG_01500_I1	17-2	SOCG_02502_I1	17-2	SPBC18E5.06_I1	27-2	SJAG_16206_I1	17-2
SPOG_04669_I1	2-1	SOCG_03223_I1	2-1	SPBC18H10.04c_I1	2-1	SJAG_03433_I1	2-1
SPOG_04669_I2	5-0	SOCG_03223_I2	5-0	SPBC18H10.04c_I2	5-0	SJAG_03433_I2	5-0
SPOG_04667_I1	94-2	SOCG_03225_I1	59-2	SPBC18H10.06c_I1	59-2	SJAG_03431_I1	59-2
SPOG_04667_I2	182-0	SOCG_03225_I2	147-0	SPBC18H10.06c_I2	147-0	SJAG_03431_I2	147-0
SPOG_04666_I1	18-0	SOCG_03226_I1	18-0	SPBC18H10.07_I1	18-0	SJAG_03430_I1	18-0
SPOG_04664_I2	398-1	SOCG_03228_I1	240-1	SPBC18H10.09_I2	405-1	SJAG_03428_I2	396-1
SPOG_04661_I1	43-0	SOCG_03231_I1	43-0	SPBC18H10.12c_I1	43-0	SJAG_03425_I1	43-0
SPOG_04657_I1	581-1	SOCG_03235_I1	581-1	SPBC18H10.16_I1	581-1	SJAG_03401_I1	583-1
SPOG_02167_I1	153-2	SOCG_00338_I1	155-2	SPBC1921.07c_I1	150-2	SJAG_00184_I1	154-2
SPOG_04857_I1	28-1	SOCG_04909_I1	28-1	SPBC19C2.03_I1	26-1	SJAG_01313_I1	30-1
SPOG_04849_I1	21-0	SOCG_04901_I1	21-0	SPBC19C2.12_I1	22-0	SJAG_01303_I1	21-0
SPOG_04849_I2	76-1	SOCG_04901_I2	76-1	SPBC19C2.12_I2	77-1	SJAG_01303_I2	76-1
SPOG_04847_I1	13-1	SOCG_04899_I1	13-1	SPBC19C2.14_I1	13-1	SJAG_01301_I1	13-1
SPOG_04847_I2	33-1	SOCG_04899_I2	33-1	SPBC19C2.14_I2	33-1	SJAG_01301_I2	33-1
SPOG_04847_I3	76-2	SOCG_04899_I3	76-2	SPBC19C2.14_I3	76-2	SJAG_01301_I3	76-2
SPOG_04846_I1	5-1	SOCG_04898_I1	5-1	SPBC19C2.15c_I1	5-1	SJAG_01300_I1	5-1
SPOG_04846_I2	184-1	SOCG_04898_I2	184-1	SPBC19C2.15c_I2	184-1	SJAG_01300_I2	184-1
SPOG_02939_I1	14-2	SOCG_03325_I1	14-2	SPBC19C7.10_I1	14-2	SJAG_01263_I1	14-2
SPOG_02939_I2	25-1	SOCG_03325_I2	25-1	SPBC19C7.10_I2	25-1	SJAG_01263_I2	25-1
SPOG_02939_I3	58-2	SOCG_03325_I3	58-2	SPBC19C7.10_I3	58-2	SJAG_01263_I3	58-2
SPOG_02939_I4	76-2	SOCG_03325_I4	76-2	SPBC19C7.10_I4	76-2	SJAG_01263_I4	76-2
SPOG_03070_I1	38-2	SOCG_01328_I1	38-2	SPBC19F5.04_I1	38-2	SJAG_00881_I1	42-2
SPOG_03071_I1	8-1	SOCG_01329_I1	8-1	SPBC19F5.05c_I1	8-1	SJAG_00882_I1	8-1
SPOG_03071_I2	64-1	SOCG_01329_I2	64-1	SPBC19F5.05c_I2	64-1	SJAG_00882_I2	64-1
SPOG_02199_I2	40-0	SOCG_00306_I2	40-0	SPBC19G7.01c_I2	38-0	SJAG_02226_I2	36-0
SPOG_02198_I2	160-1	SOCG_00307_I2	160-1	SPBC19G7.02_I2	161-1	SJAG_02225_I2	160-1
SPOG_02197_I1	13-0	SOCG_00308_I1	13-0	SPBC19G7.03c_I1	13-0	SJAG_02224_I1	13-0
SPOG_02197_I2	56-0	SOCG_00308_I2	56-0	SPBC19G7.03c_I2	56-0	SJAG_02224_I2	56-0
SPOG_02190_I2	60-1	SOCG_00315_I2	60-1	SPBC19G7.10c_I2	60-1	SJAG_02213_I2	60-1
SPOG_02190_I3	667-2	SOCG_00315_I3	668-2	SPBC19G7.10c_I3	656-2	SJAG_02213_I3	627-2
SPOG_04014_I1	88-1	SOCG_01998_I1	88-1	SPBC1A4.07c_I1	88-1	SJAG_03569_I1	88-1
SPOG_04015_I1	9-1	SOCG_01997_I1	9-1	SPBC1A4.08c_I1	9-1	SJAG_03570_I1	9-1
SPOG_04015_I2	33-0	SOCG_01997_I2	33-0	SPBC1A4.08c_I2	33-0	SJAG_03570_I2	33-0
SPOG_04679_I1	3-0	SOCG_03213_I1	3-0	SPBC1D7.01_I1	3-0	SJAG_03463_I1	3-0
SPOG_00774_I1	32-1	SOCG_00121_I1	32-1	SPBC20F10.01_I1	32-1	SJAG_01234_I1	32-1
SPOG_00774_I2	65-0	SOCG_00121_I2	65-0	SPBC20F10.01_I2	65-0	SJAG_01234_I2	65-0
SPOG_00777_I1	22-1	SOCG_00118_I1	22-1	SPBC20F10.04c_I1	22-1	SJAG_01332_I1	19-1
SPOG_00777_I2	49-1	SOCG_00118_I2	49-1	SPBC20F10.04c_I2	49-1	SJAG_01332_I2	46-1
SPOG_00777_I5	240-1	SOCG_00118_I5	239-1	SPBC20F10.04c_I5	240-1	SJAG_01332_I5	239-1
SPOG_00777_I6	270-0	SOCG_00118_I6	269-0	SPBC20F10.04c_I6	270-0	SJAG_01332_I6	269-0
SPOG_00779_I1	24-1	SOCG_00116_I1	24-1	SPBC20F10.06_I1	24-1	SJAG_01330_I1	25-1
SPOG_00779_I2	73-1	SOCG_00116_I2	73-1	SPBC20F10.06_I2	73-1	SJAG_01330_I2	74-1
SPOG_00782_I1	9-1	SOCG_00113_I1	9-1	SPBC20F10.09_I1	9-1	SJAG_01327_I1	9-1
SPOG_00782_I2	50-2	SOCG_00113_I2	50-2	SPBC20F10.09_I2	50-2	SJAG_01327_I2	50-2
SPOG_00782_I3	72-0	SOCG_00113_I3	72-0	SPBC20F10.09_I3	72-0	SJAG_01327_I3	72-0
SPOG_03141_I1	1-0	SOCG_01398_I1	1-0	SPBC211.05_I1	1-0	SJAG_05208_I1	1-0
SPOG_03141_I2	29-2	SOCG_01398_I2	29-2	SPBC211.05_I2	29-2	SJAG_05208_I2	29-2
SPOG_03144_I1	39-1	SOCG_01401_I1	39-1	SPBC211.08c_I1	39-1	SJAG_00854_I1	37-1
SPOG_04598_I1	8-2	SOCG_01479_I1	8-2	SPBC215.12_I1	9-2	SJAG_00414_I1	8-2
SPOG_04598_I2	128-2	SOCG_01479_I2	128-2	SPBC215.12_I2	129-2	SJAG_00414_I2	140-2
SPOG_04598_I3	245-0	SOCG_01479_I3	245-0	SPBC215.12_I3	246-0	SJAG_00414_I3	257-0
SPOG_04595_I1	12-0	SOCG_01482_I1	12-0	SPBC215.15_I1	12-0	SJAG_03907_I1	12-0
SPOG_04868_I1	65-1	SOCG_04920_I1	64-1	SPBC21B10.09_I1	59-1	SJAG_04324_I1	63-1
SPOG_03113_I1	37-2	SOCG_01370_I1	37-2	SPBC21C3.07c_I1	44-2	SJAG_00499_I1	37-2
SPOG_03113_I2	258-1	SOCG_01370_I2	258-1	SPBC21C3.07c_I2	265-1	SJAG_00499_I2	259-1
SPOG_03113_I3	278-2	SOCG_01370_I3	278-2	SPBC21C3.07c_I3	285-2	SJAG_00499_I3	279-2
SPOG_03115_I1	16-2	SOCG_01372_I1	16-2	SPBC21C3.09c_I1	16-2	SJAG_00493_I1	18-2
SPOG_03124_I1	332-1	SOCG_01381_I1	332-1	SPBC21C3.18_I1	332-1	SJAG_00486_I1	335-1
SPOG_03124_I2	388-1	SOCG_01381_I2	388-1	SPBC21C3.18_I2	388-1	SJAG_00486_I2	391-1
SPOG_02158_I1	39-1	SOCG_00347_I1	39-1	SPBC21D10.05c_I1	39-1	SJAG_04724_I1	39-1
SPOG_02158_I2	74-0	SOCG_00347_I2	74-0	SPBC21D10.05c_I2	74-0	SJAG_04724_I2	74-0
SPOG_02158_I3	106-2	SOCG_00347_I3	106-2	SPBC21D10.05c_I3	106-2	SJAG_04724_I3	106-2
SPOG_02166_I1	414-0	SOCG_00339_I1	415-0	SPBC21D10.12_I1	469-0	SJAG_00185_I1	435-0
SPOG_04152_I2	358-1	SOCG_03586_I2	363-1	SPBC21H7.05_I2	354-1	SJAG_00585_I2	365-1
SPOG_04152_I3	426-1	SOCG_03586_I3	431-1	SPBC21H7.05_I3	422-1	SJAG_00585_I3	433-1
SPOG_03129_I1	48-1	SOCG_01386_I1	48-1	SPBC23E6.03c_I1	48-1	SJAG_00476_I1	48-1
SPOG_01491_I1	11-1	SOCG_02511_I1	11-1	SPBC23G7.05_I1	11-1	SJAG_01117_I1	11-1
SPOG_02207_I1	11-1	SOCG_00298_I1	11-1	SPBC24C6.05_I1	11-1	SJAG_02234_I1	11-1
SPOG_02200_I1	11-2	SOCG_00305_I1	11-2	SPBC24C6.11_I1	11-2	SJAG_02227_I1	11-2
SPOG_02200_I3	138-1	SOCG_00305_I3	138-1	SPBC24C6.11_I2	138-1	SJAG_02227_I3	138-1
SPOG_02931_I1	14-1	SOCG_03317_I1	14-1	SPBC25B2.01_I1	14-1	SJAG_02601_I1	14-1
SPOG_02931_I2	32-1	SOCG_03317_I2	30-1	SPBC25B2.01_I2	32-1	SJAG_02601_I2	31-1
SPOG_02929_I1	50-0	SOCG_03315_I1	50-0	SPBC25B2.03_I1	50-0	SJAG_02603_I1	49-0
SPOG_02921_I2	449-2	SOCG_03307_I2	460-2	SPBC25B2.11_I2	444-2	SJAG_00651_I2	454-2
SPOG_00772_I3	78-0	SOCG_00123_I3	78-0	SPBC25H2.03_I3	78-0	SJAG_01236_I3	119-0
SPOG_00772_I6	637-2	SOCG_00123_I6	637-2	SPBC25H2.03_I6	637-2	SJAG_01236_I5	643-2
SPOG_00772_I7	664-1	SOCG_00123_I7	664-1	SPBC25H2.03_I7	664-1	SJAG_01236_I6	670-1
SPOG_00761_I2	56-1	SOCG_00134_I2	56-1	SPBC25H2.18_I2	56-1	SJAG_06046_I2	58-1
SPOG_03176_I1	24-1	SOCG_01433_I1	24-1	SPBC26H8.05c_I1	24-1	SJAG_00823_I1	25-1
SPOG_03176_I2	175-0	SOCG_01433_I2	175-0	SPBC26H8.05c_I2	175-0	SJAG_00823_I2	176-0
SPOG_03182_I1	4-0	SOCG_01442_I1	4-0	SPBC26H8.07c_I1	4-0	SJAG_16226_I1	4-0
SPOG_03182_I2	21-2	SOCG_01442_I2	21-2	SPBC26H8.07c_I2	21-2	SJAG_16226_I2	21-2
SPOG_03182_I3	35-2	SOCG_01442_I3	35-2	SPBC26H8.07c_I3	35-2	SJAG_16226_I3	35-2
SPOG_03182_I4	53-0	SOCG_01442_I4	53-0	SPBC26H8.07c_I4	53-0	SJAG_16226_I4	53-0
SPOG_03183_I1	5-1	SOCG_01443_I1	5-1	SPBC26H8.08c_I1	5-1	SJAG_04003_I1	5-1
SPOG_04357_I1	223-0	SOCG_03382_I1	223-0	SPBC27B12.01c_I1	214-0	SJAG_04368_I1	204-0
SPOG_04357_I2	293-2	SOCG_03382_I2	293-2	SPBC27B12.01c_I2	284-2	SJAG_04368_I2	274-2
SPOG_04361_I2	124-1	SOCG_03378_I4	196-1	SPBC27B12.05_I4	196-1	SJAG_03507_I4	194-1
SPOG_04363_I1	128-0	SOCG_03376_I1	127-0	SPBC27B12.07_I1	128-0	SJAG_03505_I1	117-0
SPOG_04364_I4	1268-0	SOCG_03375_I4	1268-0	SPBC27B12.08_I4	1276-0	SJAG_03504_I4	1282-0
SPOG_04364_I6	1673-1	SOCG_03375_I6	1673-1	SPBC27B12.08_I5	1682-1	SJAG_03504_I5	1688-1
SPOG_04366_I1	8-0	SOCG_03373_I1	8-0	SPBC27B12.10c_I1	8-0	SJAG_03502_I1	8-0
SPOG_04474_I1	6-0	SOCG_00004_I1	27-0	SPBC28F2.09_I1	6-0	SJAG_01710_I1	26-0
SPOG_04474_I2	40-0	SOCG_00004_I2	61-0	SPBC28F2.09_I2	40-0	SJAG_01710_I2	60-0
SPOG_04477_I1	5-0	SOCG_00001_I1	5-0	SPBC28F2.12_I1	5-0	SJAG_01713_I1	5-0
SPOG_04477_I2	14-2	SOCG_00001_I2	14-2	SPBC28F2.12_I2	14-2	SJAG_01713_I2	14-2
SPOG_04477_I3	38-0	SOCG_00001_I3	38-0	SPBC28F2.12_I3	38-0	SJAG_01713_I3	38-0
SPOG_04477_I4	64-1	SOCG_00001_I4	64-1	SPBC28F2.12_I4	64-1	SJAG_01713_I4	64-1
SPOG_04477_I5	84-1	SOCG_00001_I5	84-1	SPBC28F2.12_I5	84-1	SJAG_01713_I5	84-1
SPOG_00064_I1	1224-0	SOCG_04723_I1	1224-0	SPBC29A10.04_I1	1222-0	SJAG_01831_I1	1226-0
SPOG_00055_I1	52-2	SOCG_04733_I1	19-2	SPBC29A10.14_I1	19-2	SJAG_06281_I1	19-2
SPOG_00055_I2	115-1	SOCG_04733_I2	82-1	SPBC29A10.14_I2	82-1	SJAG_06281_I2	82-1
SPOG_00052_I1	50-1	SOCG_04736_I1	50-1	SPBC29A10.16c_I1	50-1	SJAG_16241_I1	49-1
SPOG_00053_I1	13-0	SOCG_04735_I1	13-0	SPBC29A10.17_I1	14-0	SJAG_03927_I1	13-0
SPOG_01519_I1	1-0	SOCG_02481_I1	1-0	SPBC29A3.04_I1	1-0	SJAG_00537_I1	1-0
SPOG_01518_I1	19-0	SOCG_02482_I1	19-0	SPBC29A3.05_I1	19-0	SJAG_05192_I1	19-0
SPOG_01518_I2	55-1	SOCG_02482_I2	55-1	SPBC29A3.05_I2	55-1	SJAG_05192_I2	55-1
SPOG_01516_I1	82-1	SOCG_02484_I1	82-1	SPBC29A3.07c_I1	82-1	SJAG_00539_I1	81-1
SPOG_01510_I14	775-1	SOCG_02491_I13	678-1	SPBC29A3.14c_I12	765-1	SJAG_05979_I7	630-1
SPOG_02858_I1	56-2	SOCG_00272_I1	56-2	SPBC2A9.05c_I1	75-2	SJAG_00553_I1	57-2
SPOG_02857_I1	104-1	SOCG_00271_I1	104-1	SPBC2A9.06c_I1	104-1	SJAG_00554_I1	104-1
SPOG_02856_I1	11-1	SOCG_00270_I1	11-1	SPBC2A9.07c_I1	11-1	SJAG_00555_I1	11-1
SPOG_02856_I2	27-2	SOCG_00270_I2	27-2	SPBC2A9.07c_I2	27-2	SJAG_00555_I2	27-2
SPOG_02854_I1	12-1	SOCG_00268_I1	12-1	SPBC2A9.08c_I1	12-1	SJAG_00557_I1	12-1
SPOG_02854_I2	60-2	SOCG_00268_I2	60-2	SPBC2A9.08c_I2	60-2	SJAG_00557_I2	60-2
SPOG_02854_I3	115-1	SOCG_00268_I3	115-1	SPBC2A9.08c_I3	115-1	SJAG_00557_I3	115-1
SPOG_02853_I1	9-2	SOCG_00267_I1	9-2	SPBC2A9.09_I1	9-2	SJAG_00558_I1	9-2
SPOG_02847_I1	230-1	SOCG_00261_I1	230-1	SPBC2D10.05_I1	230-1	SJAG_03646_I1	228-1
SPOG_02840_I1	23-0	SOCG_00254_I1	23-0	SPBC2D10.12_I1	23-0	SJAG_00941_I1	23-0
SPOG_02840_I2	48-1	SOCG_00254_I2	48-1	SPBC2D10.12_I2	48-1	SJAG_00941_I2	48-1
SPOG_02840_I3	324-0	SOCG_00254_I3	323-0	SPBC2D10.12_I3	328-0	SJAG_00941_I3	332-0
SPOG_02840_I4	347-0	SOCG_00254_I4	346-0	SPBC2D10.12_I4	351-0	SJAG_00941_I4	355-0
SPOG_02837_I1	79-2	SOCG_00251_I1	79-2	SPBC2D10.15c_I2	134-2	SJAG_00936_I2	109-2
SPOG_02837_I2	94-0	SOCG_00251_I2	94-0	SPBC2D10.15c_I3	149-0	SJAG_00936_I3	124-0
SPOG_02832_I1	38-0	SOCG_00247_I1	38-0	SPBC2D10.19c_I1	38-0	SJAG_00932_I1	38-0
SPOG_04687_I2	39-1	SOCG_03205_I2	39-1	SPBC2F12.05c_I2	34-1	SJAG_01722_I2	29-1
SPOG_04687_I3	96-0	SOCG_03205_I3	96-0	SPBC2F12.05c_I3	91-0	SJAG_01722_I3	86-0
SPOG_04694_I1	11-1	SOCG_03197_I1	11-1	SPBC2F12.13_I1	11-1	SJAG_01297_I1	11-1
SPOG_04695_I1	153-1	SOCG_03196_I1	153-1	SPBC2F12.14c_I1	153-1	SJAG_01298_I1	153-1
SPOG_01235_I1	5-0	SOCG_01813_I1	5-0	SPBC2G2.03c_I1	5-0	SJAG_00064_I1	5-0
SPOG_01235_I2	26-2	SOCG_01813_I2	26-2	SPBC2G2.03c_I2	26-2	SJAG_00064_I2	26-2
SPOG_01235_I3	70-2	SOCG_01813_I3	70-2	SPBC2G2.03c_I3	70-2	SJAG_00064_I3	69-2
SPOG_03019_I1	42-0	SOCG_01279_I1	42-0	SPBC2G2.16_I1	42-0	SJAG_02648_I1	42-0
SPOG_04355_I1	272-1	SOCG_03384_I1	272-1	SPBC30B4.07c_I1	271-1	SJAG_04367_I3	271-1
SPOG_04356_I1	27-2	SOCG_03383_I1	27-2	SPBC30B4.08_I1	43-2	SJAG_04369_I1	27-2
SPOG_02790_I1	66-2	SOCG_00205_I1	62-2	SPBC30D10.04_I1	56-2	SJAG_03097_I1	61-2
SPOG_02792_I1	1-0	SOCG_00207_I1	1-0	SPBC30D10.06_I1	1-0	SJAG_03070_I1	1-0
SPOG_02792_I2	65-0	SOCG_00207_I2	65-0	SPBC30D10.06_I2	65-0	SJAG_03070_I2	65-0
SPOG_01443_I1	6-2	SOCG_02559_I1	6-2	SPBC31E1.03_I1	6-2	SJAG_03849_I1	6-2
SPOG_01443_I2	40-2	SOCG_02559_I2	40-2	SPBC31E1.03_I2	40-2	SJAG_03849_I2	40-2
SPOG_01444_I1	194-1	SOCG_02558_I1	187-1	SPBC31E1.04_I1	194-1	SJAG_03847_I1	193-1
SPOG_03102_I1	4-2	SOCG_01359_I1	4-2	SPBC31F10.12_I1	4-2	SJAG_00912_I1	4-2
SPOG_03102_I2	55-2	SOCG_01359_I2	55-2	SPBC31F10.12_I2	55-2	SJAG_00912_I2	55-2
SPOG_03102_I3	88-1	SOCG_01359_I3	88-1	SPBC31F10.12_I3	88-1	SJAG_00912_I3	88-1
SPOG_03102_I4	156-2	SOCG_01359_I4	156-2	SPBC31F10.12_I4	156-2	SJAG_00912_I4	156-2
SPOG_03103_I1	13-1	SOCG_01360_I1	13-1	SPBC31F10.13c_I1	13-1	SJAG_00913_I1	13-1
SPOG_03103_I3	103-2	SOCG_01360_I3	103-2	SPBC31F10.13c_I3	105-2	SJAG_00913_I2	99-2
SPOG_03103_I4	134-1	SOCG_01360_I4	134-1	SPBC31F10.13c_I4	136-1	SJAG_00913_I3	130-1
SPOG_03105_I1	10-2	SOCG_01362_I1	10-2	SPBC31F10.15c_I1	10-2	SJAG_00915_I1	10-2
SPOG_03106_I1	11-2	SOCG_01363_I1	11-2	SPBC31F10.16_I1	11-2	SJAG_00916_I1	11-2
SPOG_03106_I2	53-0	SOCG_01363_I2	53-0	SPBC31F10.16_I2	53-0	SJAG_00916_I2	53-0
SPOG_02309_I1	97-1	SOCG_02716_I1	97-1	SPBC32F12.02_I1	97-1	SJAG_01218_I1	97-1
SPOG_00033_I1	17-1	SOCG_04756_I1	17-1	SPBC32F12.04_I1	17-1	SJAG_01215_I1	17-1
SPOG_00033_I2	54-0	SOCG_04756_I2	54-0	SPBC32F12.04_I2	54-0	SJAG_01215_I2	54-0
SPOG_00033_I3	72-0	SOCG_04756_I3	72-0	SPBC32F12.04_I3	72-0	SJAG_01215_I3	72-0
SPOG_00033_I4	231-0	SOCG_04756_I4	231-0	SPBC32F12.04_I4	231-0	SJAG_01215_I4	231-0
SPOG_00033_I5	386-0	SOCG_04756_I5	386-0	SPBC32F12.04_I5	386-0	SJAG_01215_I5	386-0
SPOG_00033_I6	425-2	SOCG_04756_I6	425-2	SPBC32F12.04_I6	425-2	SJAG_01215_I6	425-2
SPOG_00035_I1	60-2	SOCG_04754_I1	60-2	SPBC32F12.06_I1	60-2	SJAG_01213_I1	51-2
SPOG_04417_I1	46-2	SOCG_00059_I1	46-2	SPBC32H8.04c_I1	46-2	SJAG_00772_I1	45-2
SPOG_04418_I1	16-0	SOCG_00058_I1	16-0	SPBC32H8.05_I1	28-0	SJAG_03080_I1	16-0
SPOG_04421_I1	327-0	SOCG_00055_I1	327-0	SPBC32H8.08c_I2	347-0	SJAG_03082_I1	333-0
SPOG_04424_I1	49-2	SOCG_00053_I1	48-2	SPBC32H8.10_I1	48-2	SJAG_03061_I1	44-2
SPOG_04424_I2	76-0	SOCG_00053_I2	75-0	SPBC32H8.10_I2	75-0	SJAG_03061_I2	71-0
SPOG_02871_I1	604-1	SOCG_00286_I1	604-1	SPBC336.01_I1	604-1	SJAG_02822_I1	603-1
SPOG_02870_I1	45-0	SOCG_00287_I1	45-0	SPBC336.02_I1	45-0	SJAG_02821_I1	45-0
SPOG_05396_I1	25-2	SOCG_00290_I1	25-2	SPBC336.06c_I1	23-2	SJAG_06022_I1	22-2
SPOG_02982_I1	37-0	SOCG_01242_I1	37-0	SPBC336.09c_I1	37-0	SJAG_02813_I1	40-0
SPOG_02986_I1	81-2	SOCG_01247_I1	81-2	SPBC336.13c_I1	81-2	SJAG_02809_I1	80-2
SPOG_02986_I2	131-2	SOCG_01247_I2	131-2	SPBC336.13c_I2	131-2	SJAG_02809_I2	130-2
SPOG_02987_I6	211-1	SOCG_01248_I6	212-1	SPBC336.14c_I6	209-1	SJAG_02808_I6	192-1
SPOG_02987_I8	298-1	SOCG_01248_I8	299-1	SPBC336.14c_I8	296-1	SJAG_02808_I8	279-1
SPOG_02987_I9	374-2	SOCG_01248_I9	375-2	SPBC336.14c_I9	371-2	SJAG_02808_I9	353-2
SPOG_02987_I10	551-0	SOCG_01248_I10	552-0	SPBC336.14c_I10	548-0	SJAG_02808_I10	531-0
SPOG_02988_I1	53-2	SOCG_01249_I1	53-2	SPBC336.15_I1	53-2	SJAG_02807_I1	53-2
SPOG_04226_I1	50-1	SOCG_03512_I1	50-1	SPBC337.03_I1	50-1	SJAG_00448_I1	50-1
SPOG_04226_I2	83-0	SOCG_03512_I2	83-0	SPBC337.03_I2	83-0	SJAG_00448_I2	83-0
SPOG_04228_I1	41-0	SOCG_03510_I1	41-0	SPBC337.05c_I1	41-0	SJAG_00447_I1	41-0
SPOG_04228_I2	55-1	SOCG_03510_I2	55-1	SPBC337.05c_I2	55-1	SJAG_00447_I2	55-1
SPOG_04228_I3	95-0	SOCG_03510_I3	95-0	SPBC337.05c_I3	95-0	SJAG_00447_I3	95-0
SPOG_04229_I1	5-0	SOCG_03509_I1	5-0	SPBC337.06c_I1	5-0	SJAG_00446_I1	5-0
SPOG_04230_I1	459-0	SOCG_03508_I1	454-0	SPBC337.07c_I4	465-0	SJAG_00451_I4	467-0
SPOG_04233_I1	15-1	SOCG_03504_I1	15-1	SPBC337.12_I1	15-1	SJAG_00456_I1	20-1
SPOG_04236_I1	18-1	SOCG_03502_I1	18-1	SPBC337.14_I1	18-1	SJAG_00458_I1	20-1
SPOG_04236_I2	53-2	SOCG_03502_I2	53-2	SPBC337.14_I2	53-2	SJAG_00458_I2	55-2
SPOG_04238_I1	177-2	SOCG_03500_I1	177-2	SPBC337.16_I1	177-2	SJAG_00812_I1	177-2
SPOG_01148_I1	399-2	SOCG_00880_I1	399-2	SPBC342.01c_I1	399-2	SJAG_03656_I3	383-2
SPOG_01148_I2	440-0	SOCG_00880_I2	440-0	SPBC342.01c_I2	440-0	SJAG_03656_I4	424-0
SPOG_01049_I1	27-2	SOCG_00976_I1	27-2	SPBC342.04_I1	27-2	SJAG_04484_I1	27-2
SPOG_01049_I2	54-0	SOCG_00976_I2	54-0	SPBC342.04_I2	54-0	SJAG_04484_I2	53-0
SPOG_01286_I1	4-1	SOCG_01762_I1	4-1	SPBC354.02c_I1	4-1	SJAG_02330_I1	4-1
SPOG_01286_I2	26-0	SOCG_01762_I2	26-0	SPBC354.02c_I2	26-0	SJAG_02330_I2	26-0
SPOG_01286_I3	64-2	SOCG_01762_I3	64-2	SPBC354.02c_I3	64-2	SJAG_02330_I3	64-2
SPOG_01286_I4	75-2	SOCG_01762_I4	75-2	SPBC354.02c_I4	75-2	SJAG_02330_I4	75-2
SPOG_01286_I5	120-1	SOCG_01762_I5	120-1	SPBC354.02c_I5	120-1	SJAG_02330_I5	120-1
SPOG_01290_I1	26-2	SOCG_01758_I1	26-2	SPBC354.06_I1	26-2	SJAG_02324_I1	26-2
SPOG_01290_I2	86-0	SOCG_01758_I2	86-0	SPBC354.06_I2	86-0	SJAG_02324_I2	86-0
SPOG_01291_I3	34-2	SOCG_01757_I3	34-2	SPBC354.07c_I3	34-2	SJAG_02323_I3	36-2
SPOG_01291_I4	101-0	SOCG_01757_I4	101-0	SPBC354.07c_I4	101-0	SJAG_02323_I4	103-0
SPOG_01300_I2	37-0	SOCG_04472_I2	37-0	SPBC354.14c_I2	37-0	SJAG_00029_I2	38-0
SPOG_01300_I3	78-1	SOCG_04472_I3	78-1	SPBC354.14c_I3	78-1	SJAG_00029_I3	79-1
SPOG_04156_I1	14-1	SOCG_03582_I1	14-1	SPBC36.05c_I1	14-1	SJAG_00581_I1	14-1
SPOG_04156_I2	34-0	SOCG_03582_I2	34-0	SPBC36.05c_I2	34-0	SJAG_00581_I2	34-0
SPOG_04156_I3	51-0	SOCG_03582_I3	51-0	SPBC36.05c_I3	51-0	SJAG_00581_I3	51-0
SPOG_04156_I4	91-1	SOCG_03582_I4	91-1	SPBC36.05c_I4	91-1	SJAG_00581_I4	91-1
SPOG_04156_I5	101-2	SOCG_03582_I5	101-2	SPBC36.05c_I5	101-2	SJAG_00581_I5	101-2
SPOG_04156_I6	116-1	SOCG_03582_I6	116-1	SPBC36.05c_I6	116-1	SJAG_00581_I6	116-1
SPOG_04156_I7	131-2	SOCG_03582_I7	131-2	SPBC36.05c_I7	131-2	SJAG_00581_I7	131-2
SPOG_04156_I8	209-0	SOCG_03582_I8	209-0	SPBC36.05c_I8	209-0	SJAG_00581_I8	209-0
SPOG_04156_I9	240-0	SOCG_03582_I9	240-0	SPBC36.05c_I9	240-0	SJAG_00581_I9	240-0
SPOG_04156_I10	277-1	SOCG_03582_I10	277-1	SPBC36.05c_I10	277-1	SJAG_00581_I10	277-1
SPOG_04156_I12	360-2	SOCG_03582_I12	360-2	SPBC36.05c_I12	360-2	SJAG_00581_I11	360-2
SPOG_04157_I3	184-0	SOCG_03581_I3	166-0	SPBC36.06c_I3	158-0	SJAG_00580_I3	148-0
SPOG_00074_I1	34-1	SOCG_04713_I1	34-1	SPBC365.10_I1	32-1	SJAG_06262_I1	32-1
SPOG_02175_I1	39-0	SOCG_00330_I1	39-0	SPBC36B7.09_I1	39-0	SJAG_00169_I1	39-0
SPOG_01216_I1	68-0	SOCG_01832_I1	71-0	SPBC3B8.01c_I1	69-0	SJAG_01063_I1	83-0
SPOG_04623_I2	69-2	SOCG_01455_I2	69-2	SPBC3B9.05_I2	69-2	SJAG_01560_I1	69-2
SPOG_04622_I1	35-0	SOCG_01456_I1	35-0	SPBC3B9.06c_I1	47-0	SJAG_01561_I1	35-0
SPOG_04621_I1	103-1	SOCG_01457_I1	90-1	SPBC3B9.07c_I1	90-1	SJAG_01562_I1	90-1
SPOG_04621_I2	169-2	SOCG_01457_I2	156-2	SPBC3B9.07c_I2	156-2	SJAG_01562_I2	156-2
SPOG_04620_I1	10-2	SOCG_01458_I1	10-2	SPBC3B9.08c_I1	9-2	SJAG_04025_I1	15-2
SPOG_04620_I2	23-1	SOCG_01458_I2	23-1	SPBC3B9.08c_I2	22-1	SJAG_04025_I2	28-1
SPOG_04620_I3	32-1	SOCG_01458_I3	32-1	SPBC3B9.08c_I3	31-1	SJAG_04025_I3	37-1
SPOG_04620_I4	50-1	SOCG_01458_I4	50-1	SPBC3B9.08c_I4	49-1	SJAG_04025_I4	55-1
SPOG_04620_I5	71-2	SOCG_01458_I5	71-2	SPBC3B9.08c_I5	70-2	SJAG_04025_I5	76-2
SPOG_04620_I6	100-0	SOCG_01458_I6	100-0	SPBC3B9.08c_I6	99-0	SJAG_04025_I6	105-0
SPOG_04618_I1	9-2	SOCG_01460_I1	9-2	SPBC3B9.10_I1	9-2	SJAG_04021_I1	9-2
SPOG_04618_I2	44-0	SOCG_01460_I2	44-0	SPBC3B9.10_I2	44-0	SJAG_04021_I2	44-0
SPOG_04618_I3	81-0	SOCG_01460_I3	81-0	SPBC3B9.10_I3	81-0	SJAG_04021_I3	81-0
SPOG_04618_I4	165-0	SOCG_01460_I4	165-0	SPBC3B9.10_I4	165-0	SJAG_04021_I4	163-0
SPOG_04618_I5	186-2	SOCG_01460_I5	186-2	SPBC3B9.10_I5	186-2	SJAG_04021_I5	184-2
SPOG_04615_I1	40-2	SOCG_01463_I1	40-2	SPBC3B9.12_I1	40-2	SJAG_16224_I1	40-2
SPOG_04613_I2	275-0	SOCG_01465_I2	275-0	SPBC3B9.14c_I2	275-0	SJAG_06303_I2	278-0
SPOG_04609_I1	47-1	SOCG_01469_I1	47-1	SPBC3B9.18c_I1	46-1	SJAG_06300_I2	44-1
SPOG_04624_I1	45-0	SOCG_01454_I1	45-0	SPBC3B9.21_I1	45-0	SJAG_05694_I1	45-0
SPOG_04340_I1	26-1	SOCG_03400_I1	26-1	SPBC3D6.05_I1	26-1	SJAG_04883_I1	27-1
SPOG_04340_I2	105-0	SOCG_03400_I2	105-0	SPBC3D6.05_I2	105-0	SJAG_04883_I2	106-0
SPOG_04341_I1	36-2	SOCG_03399_I1	36-2	SPBC3D6.06c_I1	36-2	SJAG_04882_I1	36-2
SPOG_04343_I1	22-1	SOCG_03397_I1	22-1	SPBC3D6.08c_I1	22-1	SJAG_04880_I1	32-1
SPOG_04343_I2	45-1	SOCG_03397_I2	45-1	SPBC3D6.08c_I2	45-1	SJAG_04880_I2	55-1
SPOG_04344_I1	58-2	SOCG_03396_I1	58-2	SPBC3D6.09_I1	58-2	SJAG_04879_I1	57-2
SPOG_04344_I2	98-1	SOCG_03396_I2	98-1	SPBC3D6.09_I2	98-1	SJAG_04879_I2	97-1
SPOG_04345_I1	265-1	SOCG_03395_I1	265-1	SPBC3D6.10_I1	265-1	SJAG_02298_I1	265-1
SPOG_02903_I1	15-0	SOCG_03288_I1	15-0	SPBC3E7.07c_I1	16-0	SJAG_02030_I1	15-0
SPOG_02903_I2	19-0	SOCG_03288_I2	19-0	SPBC3E7.07c_I2	20-0	SJAG_02030_I2	19-0
SPOG_02903_I3	29-1	SOCG_03288_I3	29-1	SPBC3E7.07c_I3	30-1	SJAG_02030_I3	29-1
SPOG_02903_I4	47-2	SOCG_03288_I4	47-2	SPBC3E7.07c_I4	48-2	SJAG_02030_I4	47-2
SPOG_02903_I5	122-1	SOCG_03288_I5	122-1	SPBC3E7.07c_I5	123-1	SJAG_02030_I5	122-1
SPOG_02900_I1	39-0	SOCG_03285_I1	39-0	SPBC3E7.10_I1	39-0	SJAG_02033_I1	47-0
SPOG_02900_I2	46-0	SOCG_03285_I2	46-0	SPBC3E7.10_I2	46-0	SJAG_02033_I2	54-0
SPOG_02900_I3	62-1	SOCG_03285_I3	62-1	SPBC3E7.10_I3	62-1	SJAG_02033_I3	70-1
SPOG_02899_I1	30-2	SOCG_03284_I1	30-2	SPBC3E7.11c_I1	30-2	SJAG_02034_I1	30-2
SPOG_02899_I2	54-0	SOCG_03284_I2	54-0	SPBC3E7.11c_I2	54-0	SJAG_02034_I2	54-0
SPOG_01146_I1	51-0	SOCG_00882_I1	51-0	SPBC3F6.04c_I1	50-0	SJAG_03654_I1	51-0
SPOG_04122_I2	81-0	SOCG_03615_I2	81-0	SPBC3H7.01_I2	80-0	SJAG_04615_I2	75-0
SPOG_04630_I2	266-0	SOCG_03262_I2	267-0	SPBC3H7.07c_I1	266-0	SJAG_04449_I1	264-0
SPOG_04299_I1	35-0	SOCG_03441_I1	35-0	SPBC4.02c_I1	35-0	SJAG_02350_I1	77-0
SPOG_04299_I2	61-1	SOCG_03441_I2	61-1	SPBC4.02c_I2	61-1	SJAG_02350_I2	103-1
SPOG_04299_I3	97-2	SOCG_03441_I3	97-2	SPBC4.02c_I3	97-2	SJAG_02350_I3	139-2
SPOG_04301_I1	78-2	SOCG_03439_I1	78-2	SPBC4.04c_I1	78-2	SJAG_02348_I1	79-2
SPOG_02765_I1	27-0	SOCG_00180_I1	27-0	SPBC405.04c_I1	27-0	SJAG_03137_I1	27-0
SPOG_02765_I2	135-0	SOCG_00180_I2	135-0	SPBC405.04c_I2	135-0	SJAG_03137_I2	135-0
SPOG_04276_I1	17-1	SOCG_03462_I1	17-1	SPBC409.05_I1	17-1	SJAG_03219_I1	17-1
SPOG_04276_I2	33-1	SOCG_03462_I2	33-1	SPBC409.05_I2	33-1	SJAG_03219_I2	33-1
SPOG_04277_I1	42-2	SOCG_03461_I1	42-2	SPBC409.06_I1	42-2	SJAG_02341_I1	42-2
SPOG_02273_I6	156-0	SOCG_02678_I4	157-0	SPBC428.01c_I6	176-0	SJAG_06342_I6	155-0
SPOG_02278_I1	13-2	SOCG_02682_I1	9-2	SPBC428.06c_I1	9-2	SJAG_04576_I1	9-2
SPOG_02278_I2	25-1	SOCG_02682_I2	21-1	SPBC428.06c_I2	21-1	SJAG_04576_I2	21-1
SPOG_02278_I3	66-0	SOCG_02682_I3	62-0	SPBC428.06c_I3	62-0	SJAG_04576_I3	62-0
SPOG_02278_I4	103-1	SOCG_02682_I4	99-1	SPBC428.06c_I4	99-1	SJAG_04576_I4	99-1
SPOG_02290_I1	21-2	SOCG_02697_I1	21-2	SPBC428.16c_I1	21-2	SJAG_02605_I1	21-2
SPOG_02290_I2	107-0	SOCG_02697_I2	107-0	SPBC428.16c_I2	107-0	SJAG_02605_I2	107-0
SPOG_01221_I1	37-1	SOCG_01827_I1	37-1	SPBC4B4.01c_I1	36-1	SJAG_00427_I1	48-1
SPOG_01221_I2	66-0	SOCG_01827_I2	66-0	SPBC4B4.01c_I2	65-0	SJAG_00427_I2	77-0
SPOG_01229_I1	31-2	SOCG_01819_I1	31-2	SPBC4B4.09_I1	31-2	SJAG_00058_I1	31-2
SPOG_01229_I2	93-0	SOCG_01819_I2	93-0	SPBC4B4.09_I2	93-0	SJAG_00058_I2	93-0
SPOG_01229_I3	128-2	SOCG_01819_I3	128-2	SPBC4B4.09_I3	128-2	SJAG_00058_I3	128-2
SPOG_01229_I4	184-2	SOCG_01819_I4	184-2	SPBC4B4.09_I4	184-2	SJAG_00058_I4	184-2
SPOG_01229_I5	383-1	SOCG_01819_I5	383-1	SPBC4B4.09_I5	383-1	SJAG_00058_I5	383-1
SPOG_01230_I2	71-2	SOCG_01818_I2	71-2	SPBC4B4.10c_I2	73-2	SJAG_00059_I2	70-2
SPOG_01230_I3	130-0	SOCG_01818_I3	130-0	SPBC4B4.10c_I3	131-0	SJAG_00059_I3	128-0
SPOG_02773_I2	48-0	SOCG_00188_I1	14-0	SPBC4C3.06_I1	14-0	SJAG_03146_I1	14-0
SPOG_02777_I1	19-2	SOCG_00192_I1	19-2	SPBC4C3.10c_I1	19-2	SJAG_03151_I1	19-2
SPOG_02777_I2	47-1	SOCG_00192_I2	47-1	SPBC4C3.10c_I2	47-1	SJAG_03151_I2	47-1
SPOG_02777_I3	91-2	SOCG_00192_I3	91-2	SPBC4C3.10c_I3	91-2	SJAG_03151_I3	91-2
SPOG_02885_I1	10-2	SOCG_03270_I1	10-2	SPBC4F6.12_I1	10-2	SJAG_02831_I1	10-2
SPOG_02877_I3	87-2	SOCG_00280_I3	87-2	SPBC4F6.15c_I1	11-2	SJAG_02828_I4	83-2
SPOG_02874_I1	17-0	SOCG_00283_I1	17-0	SPBC4F6.18c_I1	17-0	SJAG_02824_I1	17-0
SPOG_01382_I1	55-2	SOCG_02619_I1	53-2	SPBC530.13_I1	54-2	SJAG_02057_I1	59-2
SPOG_01382_I3	166-1	SOCG_02619_I3	164-1	SPBC530.13_I4	169-1	SJAG_02057_I3	171-1
SPOG_05232_I1	1-0	SOCG_05345_I1	1-0	SPBC530.16_I1	1-0	SJAG_05736_I1	1-0
SPOG_05232_I2	38-2	SOCG_05345_I2	38-2	SPBC530.16_I2	38-2	SJAG_05736_I2	38-2
SPOG_05232_I3	55-0	SOCG_05345_I3	55-0	SPBC530.16_I3	55-0	SJAG_05736_I3	55-0
SPOG_01959_I1	353-2	SOCG_00546_I1	354-2	SPBC543.04_I1	355-2	SJAG_01184_I1	351-2
SPOG_01960_I1	55-2	SOCG_00545_I1	61-2	SPBC543.05c_I1	50-2	SJAG_01183_I1	50-2
SPOG_01960_I3	300-0	SOCG_00545_I3	306-0	SPBC543.05c_I3	295-0	SJAG_01183_I2	295-0
SPOG_01961_I1	44-1	SOCG_00544_I1	44-1	SPBC543.06c_I1	44-1	SJAG_01182_I1	44-1
SPOG_01961_I2	85-2	SOCG_00544_I2	85-2	SPBC543.06c_I2	85-2	SJAG_01182_I2	85-2
SPOG_01965_I2	151-1	SOCG_00540_I2	162-1	SPBC543.10_I2	152-1	SJAG_01178_I2	151-1
SPOG_00086_I2	79-0	SOCG_04701_I2	79-0	SPBC557.04_I2	78-0	SJAG_04465_I1	89-0
SPOG_04498_I1	64-1	SOCG_01578_I1	64-1	SPBC56F2.14_I1	64-1	SJAG_06110_I1	68-1
SPOG_01355_I1	63-1	SOCG_04416_I1	63-1	SPBC577.03c_I1	63-1	SJAG_04535_I2	62-1
SPOG_01356_I1	105-2	SOCG_04415_I1	105-2	SPBC577.04_I1	105-2	SJAG_04536_I1	97-2
SPOG_01358_I1	3-2	SOCG_04413_I1	3-2	SPBC577.06c_I1	3-2	SJAG_04537_I1	3-2
SPOG_01358_I7	1522-0	SOCG_04413_I7	1523-0	SPBC577.06c_I3	1533-0	SJAG_04537_I4	1528-0
SPOG_01359_I1	64-0	SOCG_04412_I1	62-0	SPBC577.07_I1	63-0	SJAG_04538_I1	62-0
SPOG_01359_I2	177-1	SOCG_04412_I2	175-1	SPBC577.07_I2	176-1	SJAG_04538_I2	175-1
SPOG_01360_I1	75-2	SOCG_04411_I1	75-2	SPBC577.08c_I1	75-2	SJAG_04539_I1	102-2
SPOG_01361_I2	62-2	SOCG_04410_I2	62-2	SPBC577.09_I2	62-2	SJAG_04540_I1	62-2
SPOG_01361_I3	98-2	SOCG_04410_I3	97-2	SPBC577.09_I3	98-2	SJAG_04540_I2	96-2
SPOG_01361_I4	137-0	SOCG_04410_I4	136-0	SPBC577.09_I4	137-0	SJAG_04540_I3	135-0
SPOG_01361_I5	164-1	SOCG_04410_I5	163-1	SPBC577.09_I5	164-1	SJAG_04540_I4	162-1
SPOG_01368_I1	736-2	SOCG_04403_I1	735-2	SPBC577.13_I1	745-2	SJAG_04545_I2	748-2
SPOG_01368_I2	809-2	SOCG_04403_I2	808-2	SPBC577.13_I2	818-2	SJAG_04545_I3	821-2
SPOG_01368_I3	826-0	SOCG_04403_I3	825-0	SPBC577.13_I3	835-0	SJAG_04545_I4	838-0
SPOG_02271_I2	25-0	SOCG_02676_I2	25-0	SPBC582.09_I2	25-0	SJAG_04145_I2	25-0
SPOG_02758_I1	79-0	SOCG_00172_I1	79-0	SPBC609.05_I1	79-0	SJAG_03128_I1	79-0
SPOG_04184_I1	517-2	SOCG_03554_I1	517-2	SPBC646.04_I2	525-2	SJAG_02720_I2	519-2
SPOG_04323_I1	7-0	SOCG_03417_I1	7-0	SPBC651.01c_I1	7-0	SJAG_04940_I1	7-0
SPOG_04323_I2	39-0	SOCG_03417_I2	39-0	SPBC651.01c_I2	39-0	SJAG_04940_I2	39-0
SPOG_04324_I3	225-0	SOCG_03416_I3	225-0	SPBC651.02_I3	226-0	SJAG_04939_I3	225-0
SPOG_04324_I4	231-1	SOCG_03416_I4	231-1	SPBC651.02_I4	232-1	SJAG_04939_I4	231-1
SPOG_04330_I1	8-0	SOCG_03410_I1	8-0	SPBC651.08c_I1	8-0	SJAG_04934_I1	8-0
SPOG_04331_I2	88-2	SOCG_03409_I2	88-2	SPBC651.09c_I2	88-2	SJAG_04933_I2	91-2
SPOG_04333_I1	14-2	SOCG_03407_I1	14-2	SPBC651.11c_I1	14-2	SJAG_04931_I1	14-2
SPOG_01452_I1	39-0	SOCG_02550_I1	39-0	SPBC660.10_I1	39-0	SJAG_04862_I1	41-0
SPOG_01453_I1	69-2	SOCG_02549_I1	69-2	SPBC660.11_I1	71-2	SJAG_04863_I1	60-2
SPOG_01455_I1	14-2	SOCG_02547_I1	14-2	SPBC660.13c_I1	14-2	SJAG_16249_I1	14-2
SPOG_01456_I1	405-0	SOCG_02546_I1	402-0	SPBC660.14_I1	403-0	SJAG_03853_I1	388-0
SPOG_01457_I1	16-2	SOCG_02545_I1	16-2	SPBC660.15_I1	16-2	SJAG_03852_I1	16-2
SPOG_01457_I2	159-2	SOCG_02545_I2	156-2	SPBC660.15_I2	163-2	SJAG_03852_I2	120-2
SPOG_01457_I3	173-1	SOCG_02545_I3	170-1	SPBC660.15_I3	177-1	SJAG_03852_I3	134-1
SPOG_01457_I4	227-0	SOCG_02545_I4	224-0	SPBC660.15_I4	231-0	SJAG_03852_I4	188-0
SPOG_01458_I1	6-2	SOCG_02544_I1	6-2	SPBC660.16_I1	6-2	SJAG_16250_I1	6-2
SPOG_01458_I2	8-1	SOCG_02544_I2	8-1	SPBC660.16_I2	8-1	SJAG_16250_I2	8-1
SPOG_01458_I3	29-2	SOCG_02544_I3	29-2	SPBC660.16_I3	29-2	SJAG_16250_I3	29-2
SPOG_01458_I4	52-1	SOCG_02544_I4	52-1	SPBC660.16_I4	52-1	SJAG_16250_I4	52-1
SPOG_02989_I2	76-0	SOCG_01250_I2	77-0	SPBC685.02_I2	76-0	SJAG_05280_I2	92-0
SPOG_02303_I1	70-1	SOCG_02710_I1	70-1	SPBC685.05_I1	70-1	SJAG_02804_I1	70-1
SPOG_02304_I1	13-0	SOCG_02711_I1	13-0	SPBC685.06_I1	13-0	SJAG_02803_I1	31-0
SPOG_02916_I4	357-0	SOCG_03302_I4	357-0	SPBC6B1.05c_I4	355-0	SJAG_00645_I4	356-0
SPOG_02915_I1	32-0	SOCG_03301_I1	32-0	SPBC6B1.06c_I1	32-0	SJAG_00644_I1	32-0
SPOG_02912_I1	18-2	SOCG_03298_I1	18-2	SPBC6B1.12c_I1	27-2	SJAG_00641_I1	18-2
SPOG_04164_I2	32-1	SOCG_03574_I2	32-1	SPBC713.02c_I2	32-1	SJAG_00573_I2	34-1
SPOG_04167_I1	116-1	SOCG_03571_I1	116-1	SPBC713.05_I1	116-1	SJAG_00571_I2	116-1
SPOG_04167_I2	128-2	SOCG_03571_I2	128-2	SPBC713.05_I2	128-2	SJAG_00571_I3	128-2
SPOG_04167_I3	181-1	SOCG_03571_I3	181-1	SPBC713.05_I3	181-1	SJAG_00571_I4	181-1
SPOG_04173_I1	10-0	SOCG_03565_I1	10-0	SPBC713.11c_I1	10-0	SJAG_00372_I1	10-0
SPOG_04309_I1	553-0	SOCG_03431_I1	553-0	SPBC725.04_I1	554-0	SJAG_00706_I1	557-0
SPOG_04314_I1	30-0	SOCG_03426_I1	30-0	SPBC725.09c_I1	16-0	SJAG_00700_I1	16-0
SPOG_04317_I1	38-1	SOCG_03423_I1	38-1	SPBC725.12_I1	39-1	SJAG_00697_I1	45-1
SPOG_02757_I1	9-0	SOCG_00171_I1	9-0	SPBC776.01_I1	9-0	SJAG_03127_I1	9-0
SPOG_02756_I1	18-1	SOCG_00170_I1	18-1	SPBC776.02c_I1	18-1	SJAG_03126_I1	18-1
SPOG_02755_I1	14-1	SOCG_00169_I1	77-1	SPBC776.03_I1	14-1	SJAG_03152_I1	89-1
SPOG_02754_I1	11-1	SOCG_00168_I1	11-1	SPBC776.04_I1	11-1	SJAG_03153_I1	11-1
SPOG_02754_I2	68-2	SOCG_00168_I2	68-2	SPBC776.04_I2	68-2	SJAG_03153_I2	68-2
SPOG_02754_I3	79-1	SOCG_00168_I3	79-1	SPBC776.04_I3	79-1	SJAG_03153_I3	79-1
SPOG_02753_I2	153-2	SOCG_00167_I2	153-2	SPBC776.05_I2	151-2	SJAG_03154_I2	152-2
SPOG_02753_I3	176-0	SOCG_00167_I3	176-0	SPBC776.05_I3	174-0	SJAG_03154_I3	175-0
SPOG_02753_I4	218-2	SOCG_00167_I4	218-2	SPBC776.05_I4	216-2	SJAG_03154_I4	217-2
SPOG_02753_I5	305-2	SOCG_00167_I5	305-2	SPBC776.05_I5	303-2	SJAG_03154_I5	304-2
SPOG_02753_I6	372-1	SOCG_00167_I6	372-1	SPBC776.05_I6	370-1	SJAG_03154_I6	371-1
SPOG_02749_I1	35-0	SOCG_00163_I1	35-0	SPBC776.09_I1	36-0	SJAG_03157_I1	37-0
SPOG_02749_I2	52-2	SOCG_00163_I2	52-2	SPBC776.09_I2	53-2	SJAG_03157_I2	54-2
SPOG_02748_I2	408-2	SOCG_00162_I2	408-2	SPBC776.10c_I2	408-2	SJAG_03158_I2	408-2
SPOG_02742_I9	328-0	SOCG_00156_I9	328-0	SPBC776.14_I1	328-0	SJAG_03162_I9	325-0
SPOG_02742_I10	352-1	SOCG_00156_I10	352-1	SPBC776.14_I2	352-1	SJAG_03162_I10	349-1
SPOG_02742_I11	361-2	SOCG_00156_I11	361-2	SPBC776.14_I3	361-2	SJAG_03162_I11	358-2
SPOG_02742_I12	370-0	SOCG_00156_I12	370-0	SPBC776.14_I4	370-0	SJAG_03162_I12	367-0
SPOG_02742_I14	478-0	SOCG_00156_I14	478-0	SPBC776.14_I6	478-0	SJAG_03162_I13	487-0
SPOG_02742_I15	527-0	SOCG_00156_I15	527-0	SPBC776.14_I7	527-0	SJAG_03162_I14	536-0
SPOG_02742_I16	596-0	SOCG_00156_I16	596-0	SPBC776.14_I8	596-0	SJAG_03162_I15	605-0
SPOG_00744_I2	45-0	SOCG_00151_I2	47-0	SPBC776.18c_I2	44-0	SJAG_03618_I2	44-0
SPOG_00744_I3	92-2	SOCG_00151_I3	94-2	SPBC776.18c_I3	91-2	SJAG_03618_I3	91-2
SPOG_00744_I4	117-1	SOCG_00151_I4	119-1	SPBC776.18c_I4	116-1	SJAG_03618_I4	116-1
SPOG_04440_I1	51-0	SOCG_00037_I1	51-0	SPBC83.01_I1	50-0	SJAG_03044_I1	50-0
SPOG_04447_I1	38-1	SOCG_00030_I1	38-1	SPBC83.09c_I1	40-1	SJAG_00278_I1	24-1
SPOG_04451_I1	65-0	SOCG_00026_I1	65-0	SPBC83.14c_I1	65-0	SJAG_00272_I1	65-0
SPOG_04451_I2	130-1	SOCG_00026_I2	130-1	SPBC83.14c_I2	130-1	SJAG_00272_I2	130-1
SPOG_04452_I1	14-1	SOCG_00025_I1	14-1	SPBC83.15_I1	14-1	SJAG_00271_I1	14-1
SPOG_04455_I1	17-0	SOCG_00022_I1	16-0	SPBC83.18c_I1	16-0	SJAG_00268_I1	14-0
SPOG_01307_I1	1-0	SOCG_04465_I1	1-0	SPBC839.05c_I1	1-0	SJAG_06346_I1	1-0
SPOG_01311_I1	51-1	SOCG_04461_I1	51-1	SPBC839.08c_I1	51-1	SJAG_04165_I1	51-1
SPOG_01317_I1	14-2	SOCG_04455_I1	14-2	SPBC839.14c_I1	14-2	SJAG_04159_I1	13-2
SPOG_01319_I2	60-0	SOCG_04453_I2	60-0	SPBC839.16_I2	60-0	SJAG_04156_I2	60-0
SPOG_01320_I1	9-0	SOCG_04452_I1	9-0	SPBC839.17c_I1	9-0	SJAG_04155_I1	9-0
SPOG_01320_I2	22-2	SOCG_04452_I2	22-2	SPBC839.17c_I2	22-2	SJAG_04155_I2	22-2
SPOG_01320_I3	29-1	SOCG_04452_I3	29-1	SPBC839.17c_I3	29-1	SJAG_04155_I3	29-1
SPOG_02299_I1	16-0	SOCG_02706_I1	16-0	SPBC887.04c_I1	16-0	SJAG_00312_I1	18-0
SPOG_02299_I2	74-1	SOCG_02706_I2	74-1	SPBC887.04c_I2	74-1	SJAG_00312_I2	75-1
SPOG_02297_I1	28-0	SOCG_02704_I1	28-0	SPBC887.06c_I1	28-0	SJAG_00314_I1	28-0
SPOG_02297_I2	50-0	SOCG_02704_I2	50-0	SPBC887.06c_I2	50-0	SJAG_00314_I2	50-0
SPOG_02297_I3	116-2	SOCG_02704_I3	116-2	SPBC887.06c_I3	116-2	SJAG_00314_I3	116-2
SPOG_02296_I1	14-0	SOCG_02702_I1	14-0	SPBC887.07_I1	24-0	SJAG_00315_I1	14-0
SPOG_02296_I2	34-1	SOCG_02702_I2	34-1	SPBC887.07_I2	44-1	SJAG_00315_I2	34-1
SPOG_02295_I1	42-0	SOCG_02701_I1	42-0	SPBC887.08_I1	42-0	SJAG_00316_I1	42-0
SPOG_04371_I2	63-0	SOCG_03368_I2	64-0	SPBC8D2.01_I2	63-0	SJAG_05304_I2	66-0
SPOG_04372_I1	31-0	SOCG_03367_I1	31-0	SPBC8D2.02c_I1	31-0	SJAG_03511_I1	34-0
SPOG_04372_I2	73-2	SOCG_03367_I2	73-2	SPBC8D2.02c_I2	73-2	SJAG_03511_I2	76-2
SPOG_04375_I1	25-1	SOCG_03364_I1	25-1	SPBC8D2.05c_I1	24-1	SJAG_03544_I1	23-1
SPOG_04378_I1	76-0	SOCG_03361_I1	76-0	SPBC8D2.09c_I1	76-0	SJAG_03547_I1	76-0
SPOG_04379_I2	47-1	SOCG_03360_I2	47-1	SPBC8D2.10c_I2	80-1	SJAG_03548_I2	46-1
SPOG_04382_I1	34-1	SOCG_03358_I1	34-1	SPBC8D2.12c_I1	34-1	SJAG_03550_I1	36-1
SPOG_04382_I2	55-2	SOCG_03358_I2	55-2	SPBC8D2.12c_I2	55-2	SJAG_03550_I2	57-2
SPOG_01278_I3	871-2	SOCG_01769_I2	828-2	SPBC902.02c_I2	840-2	SJAG_02610_I2	710-2
SPOG_01332_I1	467-0	SOCG_04440_I1	463-0	SPBC947.01_I1	452-0	SJAG_04566_I1	493-0
SPOG_01326_I1	21-0	SOCG_04446_I1	21-0	SPBC947.12_I1	21-0	SJAG_04558_I1	21-0
SPOG_01324_I1	61-0	SOCG_04448_I1	61-0	SPBC947.14c_I1	63-0	SJAG_04560_I1	61-0
SPOG_04651_I1	6-0	SOCG_03241_I1	6-0	SPBC9B6.05c_I1	6-0	SJAG_03460_I1	6-0
SPOG_04651_I4	82-1	SOCG_03241_I4	82-1	SPBC9B6.05c_I4	82-1	SJAG_03460_I3	77-1
SPOG_04649_I1	15-1	SOCG_03243_I1	15-1	SPBC9B6.07_I1	15-1	SJAG_03458_I1	15-1
SPOG_04649_I2	51-1	SOCG_03243_I2	51-1	SPBC9B6.07_I2	51-1	SJAG_03458_I2	51-1
SPOG_04649_I3	148-2	SOCG_03243_I3	148-2	SPBC9B6.07_I3	147-2	SJAG_03458_I3	147-2
SPOG_04646_I1	8-2	SOCG_03246_I1	8-2	SPBC9B6.10_I1	8-2	SJAG_04518_I1	8-2
SPOG_04646_I2	17-2	SOCG_03246_I2	17-2	SPBC9B6.10_I2	17-2	SJAG_04518_I2	17-2
SPOG_04646_I3	21-1	SOCG_03246_I3	21-1	SPBC9B6.10_I3	21-1	SJAG_04518_I3	21-1
SPOG_04121_I1	91-0	SOCG_03616_I1	91-0	SPBP16F5.02_I1	91-0	SJAG_04614_I1	91-0
SPOG_04121_I2	116-2	SOCG_03616_I2	116-2	SPBP16F5.02_I2	116-2	SJAG_04614_I2	116-2
SPOG_04119_I1	63-0	SOCG_03618_I1	63-0	SPBP16F5.04_I1	63-0	SJAG_04612_I1	63-0
SPOG_04119_I2	83-1	SOCG_03618_I2	83-1	SPBP16F5.04_I2	83-1	SJAG_04612_I2	83-1
SPOG_04116_I1	21-2	SOCG_03621_I1	21-2	SPBP16F5.07_I1	21-2	SJAG_04609_I1	21-2
SPOG_04116_I2	56-0	SOCG_03621_I2	56-0	SPBP16F5.07_I2	56-0	SJAG_04609_I2	56-0
SPOG_02174_I1	162-2	SOCG_00331_I1	162-2	SPBP18G5.02_I1	162-2	SJAG_00168_I1	159-2
SPOG_02174_I2	418-1	SOCG_00331_I2	418-1	SPBP18G5.02_I2	418-1	SJAG_00168_I2	381-1
SPOG_04410_I1	11-2	SOCG_00066_I1	11-2	SPBP22H7.06_I1	11-2	SJAG_04693_I1	13-2
SPOG_04410_I2	19-0	SOCG_00066_I2	19-0	SPBP22H7.06_I2	19-0	SJAG_04693_I2	21-0
SPOG_04410_I3	42-0	SOCG_00066_I3	42-0	SPBP22H7.06_I3	42-0	SJAG_04693_I3	44-0
SPOG_04020_I1	412-0	SOCG_01991_I1	412-0	SPBP23A10.04_I1	412-0	SJAG_03575_I1	431-0
SPOG_04020_I2	619-2	SOCG_01991_I2	619-2	SPBP23A10.04_I2	619-2	SJAG_03575_I2	638-2
SPOG_04021_I1	53-0	SOCG_01990_I1	53-0	SPBP23A10.05_I1	53-0	SJAG_03576_I1	53-0
SPOG_04021_I2	101-0	SOCG_01990_I2	101-0	SPBP23A10.05_I2	101-0	SJAG_03576_I2	101-0
SPOG_04027_I1	9-1	SOCG_01985_I1	9-1	SPBP23A10.10_I1	9-1	SJAG_00875_I1	9-1
SPOG_04202_I1	66-1	SOCG_03536_I1	66-1	SPBP35G2.05c_I2	66-1	SJAG_06288_I2	66-1
SPOG_04205_I2	109-0	SOCG_03533_I2	108-0	SPBP35G2.08c_I2	108-0	SJAG_03984_I2	97-0
SPOG_03034_I1	66-2	SOCG_01293_I1	38-2	SPBP8B7.01c_I1	38-2	SJAG_06613_I1	36-2
SPOG_03040_I2	72-0	SOCG_01299_I2	72-0	SPBP8B7.07c_I2	73-0	SJAG_02659_I2	72-0
SPOG_03041_I3	217-0	SOCG_01300_I3	217-0	SPBP8B7.08c_I3	217-0	SJAG_02660_I3	220-0
SPOG_03047_I3	540-0	SOCG_01306_I3	540-0	SPBP8B7.14c_I2	543-0	SJAG_02667_I3	553-0
SPOG_03049_I2	433-1	SOCG_01308_I1	431-1	SPBP8B7.16c_I2	434-1	SJAG_05276_I1	459-1
SPOG_03059_I1	12-1	SOCG_01317_I1	12-1	SPBP8B7.24c_I1	12-1	SJAG_02414_I1	12-1
SPOG_03059_I2	30-0	SOCG_01317_I2	30-0	SPBP8B7.24c_I2	30-0	SJAG_02414_I2	30-0
SPOG_01336_I1	49-2	SOCG_04436_I1	49-2	SPBPJ4664.05_I1	49-2	SJAG_04570_I1	62-2
SPOG_03311_I1	11-0	SOCG_03925_I1	11-0	SPCC1020.07_I1	11-0	SJAG_04262_I1	11-0
SPOG_03311_I2	26-1	SOCG_03925_I2	26-1	SPCC1020.07_I2	26-1	SJAG_04262_I2	26-1
SPOG_03311_I3	47-1	SOCG_03925_I3	47-1	SPCC1020.07_I3	47-1	SJAG_04262_I3	47-1
SPOG_05450_I2	104-1	SOCG_03922_I2	104-1	SPCC1020.11c_I2	106-1	SJAG_04294_I2	104-1
SPOG_03315_I2	256-1	SOCG_03920_I2	256-1	SPCC1020.13c_I2	258-1	SJAG_04291_I2	249-1
SPOG_03315_I3	501-1	SOCG_03920_I3	501-1	SPCC1020.13c_I3	505-1	SJAG_04291_I3	489-1
SPOG_03379_I2	65-0	SOCG_03858_I2	65-0	SPCC1183.01_I2	65-0	SJAG_03864_I2	65-0
SPOG_03379_I3	105-0	SOCG_03858_I3	105-0	SPCC1183.01_I3	105-0	SJAG_03864_I3	105-0
SPOG_03379_I4	252-1	SOCG_03858_I4	252-1	SPCC1183.01_I4	252-1	SJAG_03864_I4	252-1
SPOG_03379_I7	737-2	SOCG_03858_I7	737-2	SPCC1183.01_I5	738-2	SJAG_03864_I7	742-2
SPOG_03378_I1	51-0	SOCG_03859_I1	51-0	SPCC1183.02_I1	51-0	SJAG_03863_I1	51-0
SPOG_03377_I2	112-2	SOCG_03860_I2	112-2	SPCC1183.03c_I2	111-2	SJAG_03862_I2	109-2
SPOG_03375_I4	137-1	SOCG_03862_I4	137-1	SPCC1183.05c_I4	136-1	SJAG_02527_I4	131-1
SPOG_03375_I5	169-2	SOCG_03862_I5	169-2	SPCC1183.05c_I5	168-2	SJAG_02527_I5	163-2
SPOG_03375_I6	198-1	SOCG_03862_I6	198-1	SPCC1183.05c_I6	197-1	SJAG_02527_I6	192-1
SPOG_03374_I1	126-2	SOCG_03863_I1	76-2	SPCC1183.06_I1	76-2	SJAG_02528_I1	63-2
SPOG_03374_I2	237-2	SOCG_03863_I2	187-2	SPCC1183.06_I2	187-2	SJAG_02528_I2	174-2
SPOG_02477_I1	51-1	SOCG_02879_I1	51-1	SPCC11E10.07c_I1	52-1	SJAG_03678_I1	46-1
SPOG_02477_I2	97-0	SOCG_02879_I2	97-0	SPCC11E10.07c_I2	98-0	SJAG_03678_I2	92-0
SPOG_02477_I3	245-2	SOCG_02879_I3	245-2	SPCC11E10.07c_I3	246-2	SJAG_03678_I3	240-2
SPOG_02542_I2	104-1	SOCG_02940_I2	99-1	SPCC1223.01_I2	99-1	SJAG_02746_I2	100-1
SPOG_04797_I1	23-2	SOCG_04081_I1	41-2	SPCC1223.07c_I1	26-2	SJAG_01197_I1	26-2
SPOG_04800_I1	6-2	SOCG_04084_I1	6-2	SPCC1223.15c_I1	6-2	SJAG_05220_I1	6-2
SPOG_04800_I2	20-0	SOCG_04084_I2	20-0	SPCC1223.15c_I2	20-0	SJAG_05220_I2	20-0
SPOG_03527_I2	183-0	SOCG_03708_I2	183-0	SPCC1235.04c_I2	182-0	SJAG_01937_I2	182-0
SPOG_03523_I1	37-2	SOCG_03712_I1	37-2	SPCC1235.07_I1	39-2	SJAG_01928_I1	39-2
SPOG_03205_I1	47-2	SOCG_04044_I1	47-2	SPCC1259.04_I1	47-2	SJAG_00873_I1	46-2
SPOG_03199_I2	58-1	SOCG_04039_I2	58-1	SPCC1259.09c_I2	60-1	SJAG_00866_I2	61-1
SPOG_03199_I3	73-1	SOCG_04039_I3	73-1	SPCC1259.09c_I3	75-1	SJAG_00866_I3	76-1
SPOG_03194_I1	23-2	SOCG_04034_I1	23-2	SPCC1259.13_I1	23-2	SJAG_01680_I1	22-2
SPOG_03194_I3	247-1	SOCG_04034_I3	247-1	SPCC1259.13_I3	247-1	SJAG_01680_I2	246-1
SPOG_03194_I5	378-0	SOCG_04034_I5	378-0	SPCC1259.13_I5	379-0	SJAG_01680_I4	379-0
SPOG_03194_I6	477-0	SOCG_04034_I6	477-0	SPCC1259.13_I6	478-0	SJAG_01680_I5	478-0
SPOG_03195_I1	34-2	SOCG_04035_I1	34-2	SPCC1259.15c_I1	32-2	SJAG_01679_I1	34-2
SPOG_03195_I2	43-0	SOCG_04035_I2	43-0	SPCC1259.15c_I2	41-0	SJAG_01679_I2	43-0
SPOG_03195_I3	73-0	SOCG_04035_I3	73-0	SPCC1259.15c_I3	71-0	SJAG_01679_I3	73-0
SPOG_03195_I4	152-2	SOCG_04035_I4	152-2	SPCC1259.15c_I4	150-2	SJAG_01679_I4	152-2
SPOG_02451_I2	74-0	SOCG_02852_I2	74-0	SPCC126.02c_I2	72-0	SJAG_05372_I2	75-0
SPOG_02451_I4	502-0	SOCG_02852_I4	502-0	SPCC126.02c_I4	501-0	SJAG_05372_I5	501-0
SPOG_02450_I1	382-0	SOCG_02851_I1	363-0	SPCC126.03_I1	359-0	SJAG_00088_I1	322-0
SPOG_02450_I2	501-2	SOCG_02851_I2	482-2	SPCC126.03_I2	478-2	SJAG_00088_I2	441-2
SPOG_02448_I3	208-0	SOCG_02849_I3	208-0	SPCC126.05c_I3	217-0	SJAG_00086_I1	205-0
SPOG_05754_I1	7-2	SOCG_02845_I1	7-2	SPCC126.09_I1	7-2	SJAG_01990_I1	7-2
SPOG_00817_I1	44-0	SOCG_01216_I1	44-0	SPCC132.01c_I1	44-0	SJAG_01074_I1	44-0
SPOG_00818_I1	28-1	SOCG_01215_I1	28-1	SPCC132.02_I1	27-1	SJAG_01075_I1	24-1
SPOG_00826_I3	650-0	SOCG_01207_I3	650-0	SPCC1322.06_I3	650-0	SJAG_01083_I1	353-0
SPOG_00826_I7	930-0	SOCG_01207_I7	930-0	SPCC1322.06_I4	930-0	SJAG_01083_I5	636-0
SPOG_00824_I1	172-1	SOCG_01209_I1	170-1	SPCC1322.09_I1	182-1	SJAG_01085_I1	167-1
SPOG_00816_I1	102-1	SOCG_01217_I1	102-1	SPCC1322.16_I1	102-1	SJAG_01073_I1	103-1
SPOG_00816_I2	191-1	SOCG_01217_I2	191-1	SPCC1322.16_I2	191-1	SJAG_01073_I2	192-1
SPOG_00816_I3	214-1	SOCG_01217_I3	214-1	SPCC1322.16_I3	214-1	SJAG_01073_I3	215-1
SPOG_03296_I1	22-1	SOCG_03940_I1	22-1	SPCC1393.09c_I1	22-1	SJAG_06367_I1	22-1
SPOG_03296_I2	45-1	SOCG_03940_I2	45-1	SPCC1393.09c_I2	45-1	SJAG_06367_I2	45-1
SPOG_00427_I1	39-1	SOCG_04115_I1	39-1	SPCC1442.06_I1	39-1	SJAG_02502_I1	39-1
SPOG_00427_I2	73-0	SOCG_04115_I2	73-0	SPCC1442.06_I2	73-0	SJAG_02502_I2	73-0
SPOG_00425_I1	18-1	SOCG_04117_I1	18-1	SPCC1442.08c_I1	18-1	SJAG_02504_I1	14-1
SPOG_00425_I2	23-2	SOCG_04117_I2	23-2	SPCC1442.08c_I2	23-2	SJAG_02504_I2	19-2
SPOG_00425_I3	32-1	SOCG_04117_I3	32-1	SPCC1442.08c_I3	32-1	SJAG_02504_I3	28-1
SPOG_00425_I4	68-1	SOCG_04117_I4	68-1	SPCC1442.08c_I4	68-1	SJAG_02504_I4	64-1
SPOG_00423_I1	27-2	SOCG_04119_I1	27-2	SPCC1442.10c_I1	27-2	SJAG_02506_I1	27-2
SPOG_00423_I2	44-1	SOCG_04119_I2	44-1	SPCC1442.10c_I2	44-1	SJAG_02506_I2	44-1
SPOG_00452_I1	111-0	SOCG_04090_I1	111-0	SPCC1442.17c_I1	111-0	SJAG_05303_I1	38-0
SPOG_00438_I3	362-1	SOCG_04104_I3	362-1	SPCC1450.12_I3	361-1	SJAG_02492_I2	362-1
SPOG_03571_I1	22-1	SOCG_03667_I1	22-1	SPCC1494.02c_I1	22-1	SJAG_04654_I1	22-1
SPOG_03571_I2	54-0	SOCG_03667_I2	54-0	SPCC1494.02c_I2	54-0	SJAG_04654_I2	54-0
SPOG_03319_I1	13-1	SOCG_03916_I1	13-1	SPCC14G10.01_I1	13-1	SJAG_04288_I1	13-1
SPOG_03317_I1	78-0	SOCG_03918_I1	78-0	SPCC14G10.03c_I1	78-0	SJAG_04290_I1	73-0
SPOG_03316_I1	32-2	SOCG_03919_I1	32-2	SPCC14G10.04_I1	32-2	SJAG_06377_I1	32-2
SPOG_03316_I3	71-1	SOCG_03919_I3	71-1	SPCC14G10.04_I3	70-1	SJAG_06377_I3	68-1
SPOG_02455_I1	1-0	SOCG_02857_I1	1-0	SPCC1620.05_I1	1-0	SJAG_03810_I1	1-0
SPOG_02455_I3	81-2	SOCG_02857_I3	81-2	SPCC1620.05_I3	81-2	SJAG_03810_I3	81-2
SPOG_02455_I4	144-1	SOCG_02857_I4	144-1	SPCC1620.05_I4	144-1	SJAG_03810_I4	144-1
SPOG_02455_I6	286-1	SOCG_02857_I6	286-1	SPCC1620.05_I6	286-1	SJAG_03810_I6	286-1
SPOG_02456_I1	24-2	SOCG_02858_I1	24-2	SPCC1620.06c_I1	24-2	SJAG_03809_I1	24-2
SPOG_02459_I1	181-0	SOCG_02861_I1	181-0	SPCC1620.09c_I1	180-0	SJAG_00095_I1	184-0
SPOG_02459_I2	213-0	SOCG_02861_I2	213-0	SPCC1620.09c_I2	212-0	SJAG_00095_I2	216-0
SPOG_02460_I1	302-2	SOCG_02862_I1	302-2	SPCC1620.10_I1	305-2	SJAG_00094_I1	299-2
SPOG_03391_I1	11-2	SOCG_03846_I1	11-2	SPCC1672.01_I1	11-2	SJAG_00248_I1	11-2
SPOG_03391_I2	53-0	SOCG_03846_I2	53-0	SPCC1672.01_I2	53-0	SJAG_00248_I2	53-0
SPOG_03385_I1	26-1	SOCG_03852_I1	26-1	SPCC1672.07_I1	26-1	SJAG_00245_I1	26-1
SPOG_03382_I1	33-1	SOCG_03855_I1	33-1	SPCC1672.10_I1	29-1	SJAG_03867_I1	26-1
SPOG_03382_I2	68-2	SOCG_03855_I2	68-2	SPCC1672.10_I2	64-2	SJAG_03867_I2	61-2
SPOG_03380_I2	32-2	SOCG_03857_I2	32-2	SPCC1672.12c_I2	29-2	SJAG_03865_I2	32-2
SPOG_03380_I3	86-1	SOCG_03857_I3	86-1	SPCC1672.12c_I3	83-1	SJAG_03865_I3	86-1
SPOG_03380_I4	111-2	SOCG_03857_I4	111-2	SPCC1672.12c_I4	108-2	SJAG_03865_I4	111-2
SPOG_03380_I5	135-1	SOCG_03857_I5	135-1	SPCC1672.12c_I5	132-1	SJAG_03865_I5	135-1
SPOG_03467_I2	30-2	SOCG_03770_I2	30-2	SPCC1682.01_I2	48-2	SJAG_01763_I2	29-2
SPOG_03467_I3	46-0	SOCG_03770_I3	46-0	SPCC1682.01_I3	64-0	SJAG_01763_I3	45-0
SPOG_03443_I1	73-2	SOCG_03794_I1	73-2	SPCC1682.07_I1	73-2	SJAG_00758_I1	74-2
SPOG_03447_I1	5-1	SOCG_03790_I1	5-1	SPCC1682.11c_I1	5-1	SJAG_00763_I1	5-1
SPOG_03447_I3	540-2	SOCG_03790_I3	540-2	SPCC1682.11c_I3	538-2	SJAG_00763_I3	556-2
SPOG_03275_I1	9-2	SOCG_03962_I1	9-2	SPCC16A11.02_I1	9-2	SJAG_06360_I1	9-2
SPOG_03274_I1	36-2	SOCG_03963_I1	48-2	SPCC16A11.03c_I1	36-2	SJAG_04220_I1	72-2
SPOG_03271_I1	12-2	SOCG_03966_I1	12-2	SPCC16A11.05c_I1	12-2	SJAG_06358_I1	12-2
SPOG_03271_I2	21-1	SOCG_03966_I2	21-1	SPCC16A11.05c_I2	21-1	SJAG_06358_I2	21-1
SPOG_03271_I3	34-0	SOCG_03966_I3	34-0	SPCC16A11.05c_I3	34-0	SJAG_06358_I3	34-0
SPOG_03271_I4	71-0	SOCG_03966_I4	71-0	SPCC16A11.05c_I4	71-0	SJAG_06358_I4	71-0
SPOG_03268_I1	53-0	SOCG_03969_I1	53-0	SPCC16A11.08_I1	48-0	SJAG_04219_I1	38-0
SPOG_03268_I2	90-1	SOCG_03969_I2	90-1	SPCC16A11.08_I2	85-1	SJAG_04219_I2	75-1
SPOG_03266_I1	50-1	SOCG_03971_I1	50-1	SPCC16A11.10c_I1	50-1	SJAG_04217_I1	49-1
SPOG_03260_I1	80-2	SOCG_03977_I1	44-2	SPCC16A11.16c_I1	44-2	SJAG_16199_I1	44-2
SPOG_03260_I2	108-0	SOCG_03977_I2	72-0	SPCC16A11.16c_I2	72-0	SJAG_16199_I2	72-0
SPOG_03352_I1	103-2	SOCG_03884_I1	103-2	SPCC16C4.01_I1	103-2	SJAG_02548_I1	103-2
SPOG_03352_I2	194-1	SOCG_03884_I2	194-1	SPCC16C4.01_I2	192-1	SJAG_02548_I2	192-1
SPOG_03352_I3	214-0	SOCG_03884_I3	214-0	SPCC16C4.01_I3	212-0	SJAG_02548_I3	212-0
SPOG_03344_I1	58-2	SOCG_03892_I1	58-2	SPCC16C4.08c_I1	58-2	SJAG_01821_I1	58-2
SPOG_03344_I2	188-0	SOCG_03892_I2	188-0	SPCC16C4.08c_I2	188-0	SJAG_01821_I2	188-0
SPOG_03341_I1	63-2	SOCG_03895_I1	63-2	SPCC16C4.10_I1	62-2	SJAG_01824_I1	62-2
SPOG_03340_I1	14-1	SOCG_03896_I1	10-1	SPCC16C4.11_I1	10-1	SJAG_01825_I1	10-1
SPOG_03339_I1	26-0	SOCG_03897_I1	26-0	SPCC16C4.12_I1	26-0	SJAG_01826_I1	73-0
SPOG_03335_I1	77-1	SOCG_03901_I1	77-1	SPCC16C4.16c_I1	74-1	SJAG_01830_I1	85-1
SPOG_03333_I1	44-0	SOCG_03903_I1	44-0	SPCC16C4.18c_I1	44-0	SJAG_04272_I1	44-0
SPOG_02386_I2	935-1	SOCG_02786_I2	925-1	SPCC1739.03_I2	934-1	SJAG_03193_I1	1030-1
SPOG_02374_I3	77-1	SOCG_02774_I3	78-1	SPCC1739.09c_I3	80-1	SJAG_01190_I3	89-1
SPOG_02374_I5	117-2	SOCG_02774_I5	118-2	SPCC1739.09c_I5	118-2	SJAG_01190_I5	132-2
SPOG_02365_I1	75-2	SOCG_02768_I1	74-2	SPCC1739.14_I1	75-2	SJAG_01185_I1	74-2
SPOG_02499_I1	41-0	SOCG_02899_I1	37-0	SPCC1753.01c_I1	42-0	SJAG_01698_I1	40-0
SPOG_03221_I1	117-2	SOCG_04061_I1	117-2	SPCC1795.02c_I1	122-2	SJAG_04698_I1	122-2
SPOG_03222_I1	32-0	SOCG_04062_I1	32-0	SPCC1795.03_I1	32-0	SJAG_04697_I1	31-0
SPOG_03223_I2	34-2	SOCG_04063_I2	34-2	SPCC1795.04c_I2	34-2	SJAG_00778_I2	44-2
SPOG_03223_I3	195-2	SOCG_04063_I3	195-2	SPCC1795.04c_I3	195-2	SJAG_00778_I3	205-2
SPOG_03226_I1	94-2	SOCG_04066_I1	94-2	SPCC1795.07_I1	94-2	SJAG_00782_I1	94-2
SPOG_02410_I1	791-2	SOCG_02810_I1	791-2	SPCC18.04_I1	783-2	SJAG_02753_I1	772-2
SPOG_02409_I1	68-0	SOCG_02809_I1	68-0	SPCC18.05c_I1	68-0	SJAG_02754_I1	68-0
SPOG_02409_I2	200-0	SOCG_02809_I2	200-0	SPCC18.05c_I2	200-0	SJAG_02754_I2	201-0
SPOG_02409_I3	299-0	SOCG_02809_I3	299-0	SPCC18.05c_I3	299-0	SJAG_02754_I3	300-0
SPOG_02402_I1	225-2	SOCG_02802_I1	213-2	SPCC18.13_I1	227-2	SJAG_04848_I1	234-2
SPOG_02401_I1	262-0	SOCG_02801_I1	262-0	SPCC18.14c_I1	262-0	SJAG_04847_I1	262-0
SPOG_02400_I1	59-2	SOCG_02800_I1	69-2	SPCC18.15_I1	59-2	SJAG_04846_I1	55-2
SPOG_02400_I2	75-2	SOCG_02800_I2	85-2	SPCC18.15_I2	75-2	SJAG_04846_I2	71-2
SPOG_02342_I1	152-1	SOCG_02747_I1	149-1	SPCC1840.04_I1	152-1	SJAG_00135_I1	161-1
SPOG_02342_I2	172-1	SOCG_02747_I2	169-1	SPCC1840.04_I2	172-1	SJAG_00135_I2	181-1
SPOG_02342_I3	204-0	SOCG_02747_I3	201-0	SPCC1840.04_I3	204-0	SJAG_00135_I3	213-0
SPOG_02342_I5	269-1	SOCG_02747_I5	266-1	SPCC1840.04_I5	269-1	SJAG_00135_I5	278-1
SPOG_02344_I1	46-1	SOCG_02749_I1	46-1	SPCC1840.06_I1	41-1	SJAG_00133_I1	44-1
SPOG_02357_I1	9-1	SOCG_02760_I1	9-1	SPCC1840.10_I1	9-1	SJAG_01819_I1	9-1
SPOG_02357_I2	65-2	SOCG_02760_I2	65-2	SPCC1840.10_I2	65-2	SJAG_01819_I2	65-2
SPOG_02480_I3	113-1	SOCG_02882_I3	113-1	SPCC188.02_I3	112-1	SJAG_03681_I3	102-1
SPOG_02480_I4	364-0	SOCG_02882_I4	364-0	SPCC188.02_I4	363-0	SJAG_03681_I4	354-0
SPOG_02480_I5	464-2	SOCG_02882_I5	464-2	SPCC188.02_I5	463-2	SJAG_03681_I5	454-2
SPOG_02482_I1	26-0	SOCG_02884_I1	26-0	SPCC188.06c_I1	26-0	SJAG_03684_I1	26-0
SPOG_02486_I1	10-2	SOCG_02887_I1	10-2	SPCC188.11_I1	10-2	SJAG_03687_I1	10-2
SPOG_02486_I4	521-0	SOCG_02887_I4	522-0	SPCC188.11_I2	527-0	SJAG_03687_I4	522-0
SPOG_03325_I1	27-2	SOCG_03910_I1	27-2	SPCC18B5.06_I1	27-2	SJAG_04281_I1	27-2
SPOG_03325_I2	45-2	SOCG_03910_I2	45-2	SPCC18B5.06_I2	45-2	SJAG_04281_I2	45-2
SPOG_03325_I3	145-1	SOCG_03910_I3	145-1	SPCC18B5.06_I3	145-1	SJAG_04281_I3	145-1
SPOG_03325_I4	180-0	SOCG_03910_I4	180-0	SPCC18B5.06_I4	180-0	SJAG_04281_I4	180-0
SPOG_03324_I1	56-2	SOCG_03911_I1	40-2	SPCC18B5.07c_I1	40-2	SJAG_04284_I1	40-2
SPOG_03321_I2	101-1	SOCG_03914_I2	101-1	SPCC18B5.10c_I2	101-1	SJAG_05328_I2	101-1
SPOG_03321_I3	131-0	SOCG_03914_I3	131-0	SPCC18B5.10c_I3	131-0	SJAG_05328_I3	131-0
SPOG_03321_I4	154-0	SOCG_03914_I4	154-0	SPCC18B5.10c_I4	154-0	SJAG_05328_I4	154-0
SPOG_03321_I5	236-2	SOCG_03914_I5	236-2	SPCC18B5.10c_I5	236-2	SJAG_05328_I5	236-2
SPOG_03320_I2	103-1	SOCG_03915_I2	102-1	SPCC18B5.11c_I2	103-1	SJAG_04287_I2	101-1
SPOG_03320_I3	113-0	SOCG_03915_I3	112-0	SPCC18B5.11c_I3	113-0	SJAG_04287_I3	111-0
SPOG_03320_I5	228-0	SOCG_03915_I5	227-0	SPCC18B5.11c_I5	228-0	SJAG_04287_I5	227-0
SPOG_03320_I6	298-0	SOCG_03915_I6	297-0	SPCC18B5.11c_I6	298-0	SJAG_04287_I6	297-0
SPOG_03320_I7	368-2	SOCG_03915_I7	367-2	SPCC18B5.11c_I7	368-2	SJAG_04287_I7	368-2
SPOG_00415_I1	12-1	SOCG_04127_I1	14-1	SPCC1902.02_I1	14-1	SJAG_02729_I1	17-1
SPOG_00415_I2	66-1	SOCG_04127_I2	68-1	SPCC1902.02_I2	68-1	SJAG_02729_I2	71-1
SPOG_02350_I1	67-0	SOCG_02755_I1	66-0	SPCC1919.01_I1	66-0	SJAG_03797_I1	72-0
SPOG_02350_I2	152-1	SOCG_02755_I2	151-1	SPCC1919.01_I2	151-1	SJAG_03797_I2	167-1
SPOG_02350_I3	192-1	SOCG_02755_I3	191-1	SPCC1919.01_I3	191-1	SJAG_03797_I3	207-1
SPOG_02348_I2	92-1	SOCG_02753_I2	92-1	SPCC1919.03c_I2	96-1	SJAG_03800_I1	91-1
SPOG_02348_I3	126-2	SOCG_02753_I3	126-2	SPCC1919.03c_I3	130-2	SJAG_03800_I2	125-2
SPOG_02348_I4	282-0	SOCG_02753_I4	282-0	SPCC1919.03c_I4	286-0	SJAG_03800_I3	281-0
SPOG_02330_I1	12-2	SOCG_02735_I1	12-2	SPCC1919.09_I1	12-2	SJAG_03012_I1	12-2
SPOG_02330_I2	36-2	SOCG_02735_I2	36-2	SPCC1919.09_I2	36-2	SJAG_03012_I2	36-2
SPOG_02331_I1	10-2	SOCG_02736_I1	10-2	SPCC1919.10c_I1	10-2	SJAG_03011_I1	10-2
SPOG_02331_I2	46-0	SOCG_02736_I2	46-0	SPCC1919.10c_I2	46-0	SJAG_03011_I2	46-0
SPOG_02335_I3	380-0	SOCG_02740_I3	378-0	SPCC1919.14c_I3	391-0	SJAG_03007_I3	746-0
SPOG_00836_I1	3-1	SOCG_01197_I1	3-1	SPCC23B6.01c_I1	3-1	SJAG_03718_I1	6-1
SPOG_00836_I2	18-0	SOCG_01197_I2	18-0	SPCC23B6.01c_I2	18-0	SJAG_03718_I2	22-0
SPOG_00836_I3	29-2	SOCG_01197_I3	29-2	SPCC23B6.01c_I3	29-2	SJAG_03718_I3	33-2
SPOG_00836_I4	55-2	SOCG_01197_I4	55-2	SPCC23B6.01c_I4	55-2	SJAG_03718_I4	59-2
SPOG_03253_I1	8-1	SOCG_03984_I1	8-1	SPCC24B10.07_I1	8-1	SJAG_04206_I1	8-1
SPOG_03251_I1	1-0	SOCG_03986_I1	1-0	SPCC24B10.09_I1	1-0	SJAG_04204_I1	1-0
SPOG_03249_I1	3-1	SOCG_03988_I1	3-1	SPCC24B10.11c_I1	3-1	SJAG_16201_I1	3-1
SPOG_03249_I3	126-2	SOCG_03988_I3	126-2	SPCC24B10.11c_I3	126-2	SJAG_16201_I3	123-2
SPOG_03243_I2	131-0	SOCG_03994_I2	131-0	SPCC24B10.17_I2	97-0	SJAG_16202_I2	99-0
SPOG_03242_I1	31-1	SOCG_03995_I1	31-1	SPCC24B10.18_I1	31-1	SJAG_04195_I1	30-1
SPOG_03242_I2	49-0	SOCG_03995_I2	49-0	SPCC24B10.18_I2	49-0	SJAG_04195_I2	48-0
SPOG_02536_I1	17-2	SOCG_02934_I1	17-2	SPCC285.12_I1	17-2	SJAG_05240_I1	17-2
SPOG_02538_I1	10-1	SOCG_02936_I1	10-1	SPCC285.14_I1	10-1	SJAG_02750_I1	10-1
SPOG_02541_I2	136-0	SOCG_02939_I2	136-0	SPCC285.17_I2	135-0	SJAG_02747_I1	166-0
SPOG_02541_I3	186-0	SOCG_02939_I3	186-0	SPCC285.17_I3	185-0	SJAG_02747_I2	216-0
SPOG_02396_I1	79-2	SOCG_02796_I1	79-2	SPCC290.02_I1	79-2	SJAG_03181_I1	79-2
SPOG_03458_I2	64-2	SOCG_03779_I2	64-2	SPCC306.07c_I2	66-2	SJAG_01752_I1	67-2
SPOG_03460_I1	20-2	SOCG_03777_I1	20-2	SPCC306.09c_I1	20-2	SJAG_01754_I1	20-2
SPOG_03365_I1	4-0	SOCG_03871_I1	4-0	SPCC31H12.04c_I1	4-0	SJAG_02535_I1	4-0
SPOG_03364_I1	15-1	SOCG_03872_I1	15-1	SPCC31H12.05c_I1	15-1	SJAG_02536_I1	15-1
SPOG_03364_I2	56-0	SOCG_03872_I2	56-0	SPCC31H12.05c_I2	56-0	SJAG_02536_I2	56-0
SPOG_03364_I3	290-0	SOCG_03872_I3	290-0	SPCC31H12.05c_I3	290-0	SJAG_02536_I3	290-0
SPOG_03362_I1	11-1	SOCG_03874_I1	11-1	SPCC31H12.07_I1	11-1	SJAG_02539_I1	11-1
SPOG_03362_I2	68-2	SOCG_03874_I2	68-2	SPCC31H12.07_I2	68-2	SJAG_02539_I2	68-2
SPOG_03362_I3	79-1	SOCG_03874_I3	79-1	SPCC31H12.07_I3	79-1	SJAG_02539_I3	79-1
SPOG_03532_I1	34-0	SOCG_03703_I1	34-0	SPCC320.04c_I1	34-0	SJAG_01929_I1	34-0
SPOG_03532_I2	60-1	SOCG_03703_I2	60-1	SPCC320.04c_I2	60-1	SJAG_01929_I2	60-1
SPOG_03532_I3	105-0	SOCG_03703_I3	105-0	SPCC320.04c_I3	105-0	SJAG_01929_I3	105-0
SPOG_03532_I4	157-0	SOCG_03703_I4	157-0	SPCC320.04c_I4	157-0	SJAG_01929_I4	157-0
SPOG_03532_I5	179-0	SOCG_03703_I5	179-0	SPCC320.04c_I5	179-0	SJAG_01929_I5	179-0
SPOG_03532_I6	194-1	SOCG_03703_I6	194-1	SPCC320.04c_I6	194-1	SJAG_01929_I6	194-1
SPOG_03532_I7	305-1	SOCG_03703_I7	305-1	SPCC320.04c_I7	305-1	SJAG_01929_I7	305-1
SPOG_03532_I8	434-0	SOCG_03703_I8	434-0	SPCC320.04c_I8	434-0	SJAG_01929_I8	434-0
SPOG_03532_I9	472-0	SOCG_03703_I9	472-0	SPCC320.04c_I9	468-0	SJAG_01929_I9	471-0
SPOG_03532_I10	515-0	SOCG_03703_I10	515-0	SPCC320.04c_I10	511-0	SJAG_01929_I10	514-0
SPOG_03532_I11	540-0	SOCG_03703_I11	540-0	SPCC320.04c_I11	536-0	SJAG_01929_I11	539-0
SPOG_03532_I12	576-0	SOCG_03703_I12	576-0	SPCC320.04c_I12	572-0	SJAG_01929_I12	575-0
SPOG_03537_I2	73-0	SOCG_03698_I2	74-0	SPCC320.09_I2	87-0	SJAG_01841_I2	77-0
SPOG_03538_I1	87-0	SOCG_03697_I1	87-0	SPCC320.10_I1	102-0	SJAG_01840_I1	89-0
SPOG_03539_I1	19-2	SOCG_03696_I1	19-2	SPCC320.11c_I1	19-2	SJAG_01839_I1	19-2
SPOG_03539_I2	48-2	SOCG_03696_I2	48-2	SPCC320.11c_I2	48-2	SJAG_01839_I2	48-2
SPOG_03542_I1	185-1	SOCG_03694_I1	185-1	SPCC320.12_I1	184-1	SJAG_01838_I1	174-1
SPOG_00513_I1	18-0	SOCG_04798_I1	38-0	SPCC338.07c_I1	18-0	SJAG_02920_I1	17-0
SPOG_00506_I2	81-1	SOCG_04805_I2	81-1	SPCC338.15_I2	81-1	SJAG_01069_I2	81-1
SPOG_03422_I2	55-1	SOCG_03815_I2	55-1	SPCC364.04c_I2	55-1	SJAG_02316_I2	52-1
SPOG_00412_I1	241-0	SOCG_04130_I1	241-0	SPCC417.06c_I1	203-0	SJAG_02736_I1	228-0
SPOG_00870_I1	8-1	SOCG_01163_I1	8-1	SPCC4B3.02c_I1	8-1	SJAG_04111_I1	8-1
SPOG_00870_I2	23-0	SOCG_01163_I2	23-0	SPCC4B3.02c_I2	23-0	SJAG_04111_I2	23-0
SPOG_00872_I2	125-0	SOCG_01161_I2	125-0	SPCC4B3.04c_I2	125-0	SJAG_06326_I2	126-0
SPOG_00873_I1	16-1	SOCG_01160_I1	16-1	SPCC4B3.05c_I1	16-1	SJAG_06325_I1	12-1
SPOG_00873_I2	27-0	SOCG_01160_I2	27-0	SPCC4B3.05c_I2	27-0	SJAG_06325_I2	23-0
SPOG_00873_I3	36-1	SOCG_01160_I3	36-1	SPCC4B3.05c_I3	36-1	SJAG_06325_I3	32-1
SPOG_00873_I4	205-0	SOCG_01160_I4	205-0	SPCC4B3.05c_I4	205-0	SJAG_06325_I4	201-0
SPOG_00885_I1	61-2	SOCG_01148_I1	61-2	SPCC4B3.20_I1	60-2	SJAG_01140_I1	62-2
SPOG_03439_I2	167-2	SOCG_03798_I2	167-2	SPCC4G3.15c_I2	166-2	SJAG_01053_I2	168-2
SPOG_03439_I3	240-2	SOCG_03798_I3	240-2	SPCC4G3.15c_I3	239-2	SJAG_01053_I3	241-2
SPOG_00865_I2	211-0	SOCG_01168_I2	211-0	SPCC550.02c_I2	211-0	SJAG_04117_I1	212-0
SPOG_00863_I3	306-2	SOCG_01170_I3	306-2	SPCC550.04c_I3	306-2	SJAG_06331_I1	318-2
SPOG_00856_I1	55-1	SOCG_01177_I1	55-1	SPCC550.11_I1	55-1	SJAG_03693_I1	55-1
SPOG_00855_I1	27-2	SOCG_01178_I1	29-2	SPCC550.12_I1	27-2	SJAG_03694_I1	27-2
SPOG_00855_I2	65-0	SOCG_01178_I2	67-0	SPCC550.12_I2	65-0	SJAG_03694_I2	65-0
SPOG_03482_I2	49-2	SOCG_03756_I2	49-2	SPCC553.02_I2	49-2	SJAG_02618_I2	42-2
SPOG_03482_I4	523-2	SOCG_03756_I4	520-2	SPCC553.02_I4	523-2	SJAG_02618_I4	518-2
SPOG_03495_I2	417-0	SOCG_03743_I2	416-0	SPCC553.09c_I2	415-0	SJAG_02172_I2	417-0
SPOG_03495_I3	520-0	SOCG_03743_I3	519-0	SPCC553.09c_I3	518-0	SJAG_02172_I3	520-0
SPOG_03497_I1	12-2	SOCG_03741_I1	12-2	SPCC553.11c_I1	12-2	SJAG_02174_I1	12-2
SPOG_03497_I2	14-2	SOCG_03741_I2	14-2	SPCC553.11c_I2	14-2	SJAG_02174_I2	14-2
SPOG_03497_I3	41-0	SOCG_03741_I3	41-0	SPCC553.11c_I3	41-0	SJAG_02174_I3	41-0
SPOG_02427_I2	274-0	SOCG_02828_I2	273-0	SPCC576.06c_I2	268-0	SJAG_04473_I2	268-0
SPOG_02433_I1	50-2	SOCG_02834_I1	50-2	SPCC576.12c_I1	50-2	SJAG_02465_I1	50-2
SPOG_02435_I1	87-2	SOCG_02836_I1	87-2	SPCC576.14_I1	87-2	SJAG_02467_I1	87-2
SPOG_02435_I2	164-1	SOCG_02836_I2	164-1	SPCC576.14_I2	164-1	SJAG_02467_I3	164-1
SPOG_02435_I3	208-1	SOCG_02836_I3	208-1	SPCC576.14_I3	208-1	SJAG_02467_I4	208-1
SPOG_02436_I1	193-0	SOCG_02837_I1	191-0	SPCC576.15c_I1	191-0	SJAG_02468_I2	199-0
SPOG_02498_I1	10-1	SOCG_02898_I1	10-1	SPCC584.05_I1	10-1	SJAG_01697_I1	10-1
SPOG_02498_I2	23-0	SOCG_02898_I2	23-0	SPCC584.05_I2	23-0	SJAG_01697_I2	22-0
SPOG_02490_I1	8-2	SOCG_02890_I1	8-2	SPCC584.11c_I1	8-2	SJAG_03690_I1	8-2
SPOG_03359_I1	103-1	SOCG_03877_I1	103-1	SPCC5E4.03c_I1	103-1	SJAG_02541_I1	103-1
SPOG_03359_I2	467-0	SOCG_03877_I2	467-0	SPCC5E4.03c_I2	467-0	SJAG_02541_I2	468-0
SPOG_00027_I1	29-1	SOCG_04766_I1	29-1	SPCC613.08_I1	29-1	SJAG_00753_I1	29-1
SPOG_00028_I1	34-2	SOCG_04765_I1	34-2	SPCC613.09_I1	34-2	SJAG_00754_I1	34-2
SPOG_04766_I1	56-0	SOCG_04023_I1	56-0	SPCC622.11_I1	113-0	SJAG_03265_I1	56-0
SPOG_04769_I1	96-0	SOCG_04020_I1	97-0	SPCC622.14_I2	97-0	SJAG_03268_I2	99-0
SPOG_03282_I1	79-2	SOCG_03955_I1	79-2	SPCC63.07_I1	79-2	SJAG_06361_I1	79-2
SPOG_03282_I2	179-0	SOCG_03955_I2	179-0	SPCC63.07_I2	179-0	SJAG_06361_I2	179-0
SPOG_00841_I1	437-0	SOCG_01192_I1	437-0	SPCC645.10_I1	437-0	SJAG_01704_I3	436-0
SPOG_02530_I1	13-2	SOCG_02928_I1	13-2	SPCC663.18_I1	13-2	SJAG_03365_I1	13-2
SPOG_02530_I2	24-1	SOCG_02928_I2	24-1	SPCC663.18_I2	24-1	SJAG_03365_I2	24-1
SPOG_03566_I1	51-1	SOCG_03672_I1	50-1	SPCC70.09c_I1	48-1	SJAG_04659_I1	53-1
SPOG_03478_I2	86-0	SOCG_03759_I1	46-0	SPCC736.11_I1	43-0	SJAG_02621_I1	49-0
SPOG_03477_I2	339-1	SOCG_03760_I2	340-1	SPCC736.12c_I2	349-1	SJAG_02622_I2	339-1
SPOG_03477_I3	377-0	SOCG_03760_I3	378-0	SPCC736.12c_I3	387-0	SJAG_02622_I3	377-0
SPOG_03477_I4	428-2	SOCG_03760_I4	429-2	SPCC736.12c_I4	437-2	SJAG_02622_I4	428-2
SPOG_02468_I3	278-2	SOCG_02870_I3	278-2	SPCC737.06c_I3	278-2	SJAG_03494_I4	276-2
SPOG_02362_I2	107-0	SOCG_02765_I2	107-0	SPCC74.01_I2	107-0	SJAG_03499_I3	106-0
SPOG_02362_I3	470-2	SOCG_02765_I3	470-2	SPCC74.01_I3	470-2	SJAG_03499_I4	469-2
SPOG_02362_I4	506-0	SOCG_02765_I4	506-0	SPCC74.01_I4	506-0	SJAG_03499_I5	505-0
SPOG_02364_I1	42-1	SOCG_02767_I1	42-1	SPCC74.03c_I1	50-1	SJAG_03501_I1	35-1
SPOG_02364_I2	119-0	SOCG_02767_I2	119-0	SPCC74.03c_I2	127-0	SJAG_03501_I2	112-0
SPOG_02364_I3	237-1	SOCG_02767_I3	237-1	SPCC74.03c_I3	245-1	SJAG_03501_I3	230-1
SPOG_00008_I1	55-2	SOCG_04783_I1	55-2	SPCC757.08_I1	55-2	SJAG_04824_I1	55-2
SPOG_00008_I2	95-2	SOCG_04783_I2	95-2	SPCC757.08_I2	95-2	SJAG_04824_I2	95-2
SPOG_00013_I1	142-0	SOCG_04779_I1	142-0	SPCC757.10_I1	141-0	SJAG_06514_I1	125-0
SPOG_02522_I1	201-2	SOCG_02921_I1	202-2	SPCC777.07_I1	202-2	SJAG_01021_I1	199-2
SPOG_02519_I1	31-1	SOCG_02918_I1	31-1	SPCC777.10c_I1	31-1	SJAG_01018_I1	31-1
SPOG_02519_I2	63-1	SOCG_02918_I2	63-1	SPCC777.10c_I2	63-1	SJAG_01018_I2	63-1
SPOG_02519_I3	92-0	SOCG_02918_I3	92-0	SPCC777.10c_I3	92-0	SJAG_01018_I3	92-0
SPOG_02519_I4	142-1	SOCG_02918_I4	142-1	SPCC777.10c_I4	142-1	SJAG_01018_I4	142-1
SPOG_02515_I1	534-0	SOCG_02915_I1	534-0	SPCC777.13_I1	536-0	SJAG_01039_I1	539-0
SPOG_02515_I3	689-2	SOCG_02915_I3	689-2	SPCC777.13_I3	691-2	SJAG_01039_I2	694-2
SPOG_02514_I1	329-1	SOCG_02914_I1	331-1	SPCC777.14_I1	332-1	SJAG_01040_I2	334-1
SPOG_02337_I1	82-1	SOCG_02742_I1	82-1	SPCC790.02_I1	84-1	SJAG_03005_I1	80-1
SPOG_03211_I2	62-1	SOCG_04051_I2	62-1	SPCC825.02_I2	62-1	SJAG_03535_I2	61-1
SPOG_03211_I3	75-1	SOCG_04051_I3	75-1	SPCC825.02_I3	75-1	SJAG_03535_I3	74-1
SPOG_03211_I6	413-2	SOCG_04051_I6	412-2	SPCC825.02_I6	413-2	SJAG_03535_I5	417-2
SPOG_02326_I1	56-0	SOCG_02731_I1	56-0	SPCC830.05c_I1	56-0	SJAG_03791_I1	56-0
SPOG_02325_I1	18-1	SOCG_02730_I1	18-1	SPCC830.06_I1	18-1	SJAG_03793_I1	18-1
SPOG_02325_I2	97-1	SOCG_02730_I2	97-1	SPCC830.06_I2	97-1	SJAG_03793_I2	97-1
SPOG_02325_I3	134-0	SOCG_02730_I3	134-0	SPCC830.06_I3	134-0	SJAG_03793_I3	134-0
SPOG_02323_I1	17-0	SOCG_02728_I1	17-0	SPCC830.08c_I1	17-0	SJAG_03794_I1	17-0
SPOG_02321_I2	37-1	SOCG_02726_I2	37-1	SPCC830.10_I2	37-1	SJAG_16258_I2	40-1
SPOG_02321_I3	58-0	SOCG_02726_I3	58-0	SPCC830.10_I3	58-0	SJAG_16258_I3	61-0
SPOG_02321_I4	83-2	SOCG_02726_I4	83-2	SPCC830.10_I4	83-2	SJAG_16258_I4	86-2
SPOG_02321_I5	94-1	SOCG_02726_I5	94-1	SPCC830.10_I5	94-1	SJAG_16258_I5	97-1
SPOG_02321_I6	150-0	SOCG_02726_I6	150-0	SPCC830.10_I6	150-0	SJAG_16258_I6	153-0
SPOG_03218_I1	43-0	SOCG_04058_I1	43-0	SPCC895.04c_I1	40-0	SJAG_04701_I1	44-0
SPOG_03213_I4	1041-0	SOCG_04053_I4	1027-0	SPCC895.09c_I4	1025-0	SJAG_03533_I1	1035-0
SPOG_03397_I1	43-0	SOCG_03840_I1	43-0	SPCC962.02c_I1	43-0	SJAG_04412_I1	40-0
SPOG_03408_I1	90-2	SOCG_03829_I1	90-2	SPCC970.01_I1	90-2	SJAG_02556_I1	89-2
SPOG_03408_I5	612-0	SOCG_03829_I5	612-0	SPCC970.01_I6	610-0	SJAG_02556_I5	594-0
SPOG_03408_I6	654-0	SOCG_03829_I6	654-0	SPCC970.01_I7	652-0	SJAG_02556_I6	637-0
SPOG_03408_I7	741-0	SOCG_03829_I7	741-0	SPCC970.01_I8	739-0	SJAG_02556_I7	724-0
SPOG_03410_I1	71-0	SOCG_03827_I1	71-0	SPCC970.02_I1	71-0	SJAG_05272_I1	70-0
SPOG_03410_I2	262-0	SOCG_03827_I2	262-0	SPCC970.02_I2	262-0	SJAG_05272_I2	261-0
SPOG_03410_I3	366-1	SOCG_03827_I3	366-1	SPCC970.02_I3	366-1	SJAG_05272_I3	365-1
SPOG_03417_I2	71-0	SOCG_03820_I2	71-0	SPCC970.09_I2	70-0	SJAG_02320_I2	72-0
SPOG_03409_I3	101-2	SOCG_03828_I3	101-2	SPCC970.12_I3	101-2	SJAG_05273_I3	103-2
SPOG_03554_I1	42-1	SOCG_03683_I1	42-1	SPCP1E11.02_I1	42-1	SJAG_04051_I1	42-1
SPOG_03554_I2	85-0	SOCG_03683_I2	85-0	SPCP1E11.02_I2	85-0	SJAG_04051_I2	85-0
SPOG_03554_I3	235-1	SOCG_03683_I3	235-1	SPCP1E11.02_I3	235-1	SJAG_04051_I3	235-1
SPOG_02314_I1	24-2	SOCG_02720_I1	24-2	SPCP1E11.08_I1	24-2	SJAG_01811_I1	24-2
SPOG_02314_I2	64-2	SOCG_02720_I2	64-2	SPCP1E11.08_I2	64-2	SJAG_01811_I2	64-2
SPOG_02316_I1	21-0	SOCG_02722_I1	21-0	SPCP1E11.10_I1	21-0	SJAG_01812_I1	21-0
SPOG_02316_I2	48-1	SOCG_02722_I2	48-1	SPCP1E11.10_I2	48-1	SJAG_01812_I2	48-1
SPOG_03403_I2	138-1	SOCG_03834_I2	139-1	SPCP31B10.04_I2	136-1	SJAG_06417_I2	133-1
SPOG_03235_I1	37-0	SOCG_04075_I1	37-0	SPCPB16A4.04c_I1	38-0	SJAG_04680_I1	38-0
SPOG_03235_I2	57-2	SOCG_04075_I2	57-2	SPCPB16A4.04c_I2	58-2	SJAG_04680_I2	58-2
